# Supplementary material for: Unusual C3-acetylation of quinoxalin-2(1H)-one via oxidative C–C and C–O bond cleavages of PEG-400
Source: Royal Society of Chemistry journal article supplement (doi:10.1039/d1ob00769f), 2021-01-01

## Supporting Information

For

### Unusual C<sub>3</sub>-Acetylation of Quinoxalin-2(1*H*)-one via Oxidative C–C and C–O Bond Cleavages of PEG-400.

Vishal Suresh Kudale,<sup>a</sup> Mohana Reddy Mutra,<sup>a</sup> Ching-Piao Chu<sup>a</sup> and Jeh-Jeng Wang\*<sup>ab</sup>

<sup>a</sup> Department of Medicinal and Applied Chemistry, Kaohsiung Medical University, No. 100, Shiquan 1st Rd, Sanmin District, Kaohsiung City, 807, Taiwan.

<sup>b</sup> Department of Medical Research, Kaohsiung Medical University Hospital, No. 100 Tzyou 1st Rd, Sanmin District, Kaohsiung City 807, Taiwan.

E-mail: [jjwang@kmu.edu.tw](mailto:jjwang@kmu.edu.tw)

## Table of Contents

|                                             |         |
|---------------------------------------------|---------|
| 1) General Information                      | S3      |
| 2) Mechanistic studies                      | S3-S4   |
| 3) Experimental Procedures                  | S5      |
| 4) Spectral Characterization                | S5-S14  |
| 5) References                               | S15     |
| 6) Copies of $^1\text{H}$ & $^{13}\text{C}$ | S16-S36 |
| 7) X-Ray crystallographic data              | S37-S44 |

## (1) General Information

$^1\text{H}$ ,  $^{13}\text{C}$ , and DEPT NMR spectra were recorded on a 400 MHz Varian Unity Plus or Varian Mercury plus spectrometer. The chemical shift ( $\delta$ ) values are reported in parts per million (ppm), and the coupling constants (J) are given in Hz. The spectra were recorded using  $\text{CDCl}_3$  as a solvent.  $^1\text{H}$  NMR chemical shifts are referenced to tetramethylsilane (TMS) (0 ppm).  $^{13}\text{C}$  NMR was referenced to  $\text{CDCl}_3$  (77.0 ppm) or  $\text{DMSO-d}_6$  (39.51 ppm). The abbreviations used are as follows: s, singlet; d, doublet; t, triplet; q, quartet; dd, doublet of doublet; ddd, doublet of doublet; dt, doublet of triplets; td, triplet of doublet; m, multiplet. Mass spectra and high-resolution mass spectra (HRMS) were measured using the ESI (FT-MS solariX) at National Sun Yat-Sen University, Kaohsiung, Taiwan. Melting points were determined on an EZ-Melt (Automated melting point apparatus). All products reported showed  $^1\text{H}$  NMR spectra in agreement with the assigned structures. Reaction progress and product mixtures were routinely monitored by TLC using Merck TLC aluminum sheets (silica gel 60 F254). Column chromatography was carried out with 230–400 mesh silica gel 60 (Merck) and a mixture of hexane/ethyl acetate or hexane as eluent. Preparative TLC was run on Merck TLC aluminum sheets (silica gel 60 F254).

## (2) Mechanistic studies:

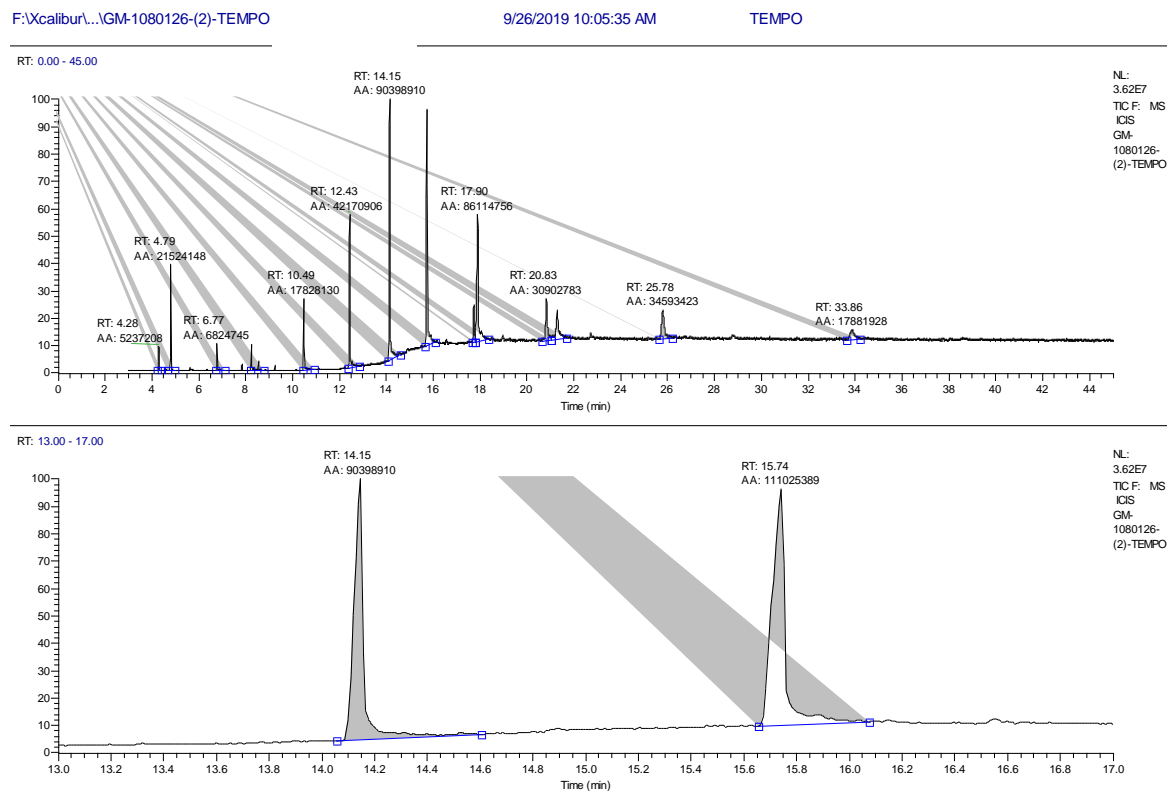

**Fig S1: GC-MS with different retention times generated from PEG-400 in the presence of oxidant & radical scavenger.**

GM-1080126-(2)-TEMPO #908-911 RT: 12.41-12.4

L: 5.38E6

T: + c Full ms [ 40.00-700.00]

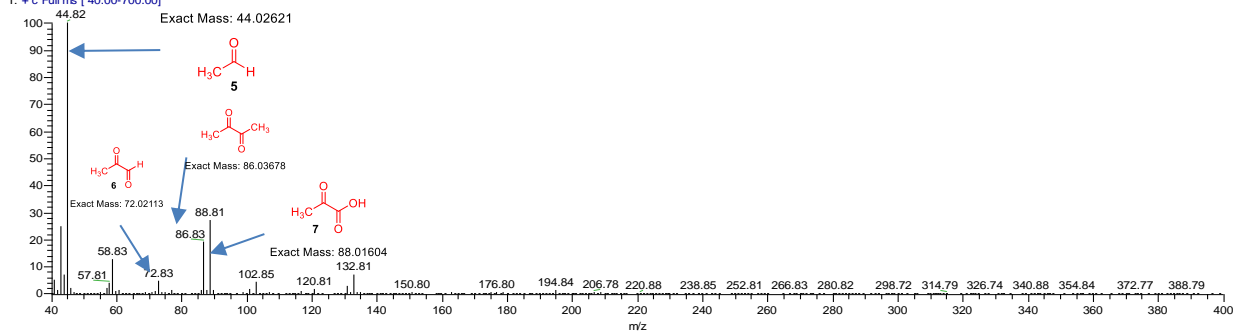

GM-1080126-(2)-TEMPO #1073-1077 RT: 14.12-14.16 AV: 5 SB: 11 14.20-14.30 NL: 8.18E6

T: + c Full ms [ 40.00-700.00]

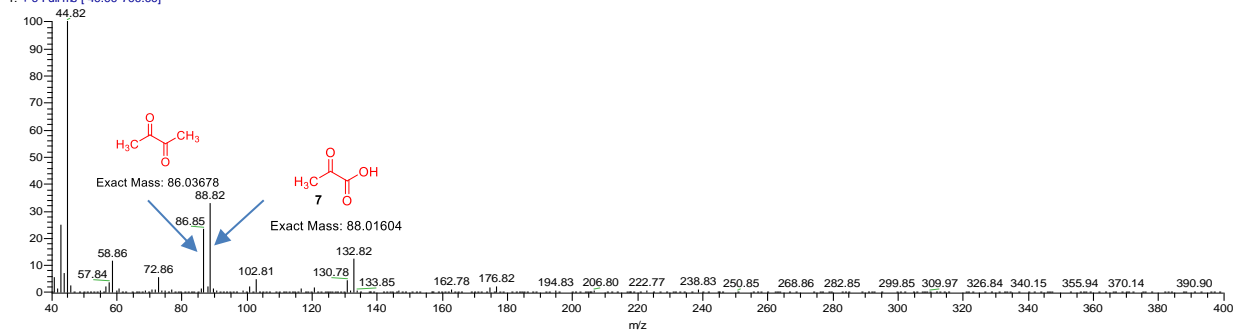

GM-1080126-(2)-TEMPO #1229-1234 RT: 15.70-15.7

:90 NL: 7.28E6

T: + c Full ms [ 40.00-700.00]

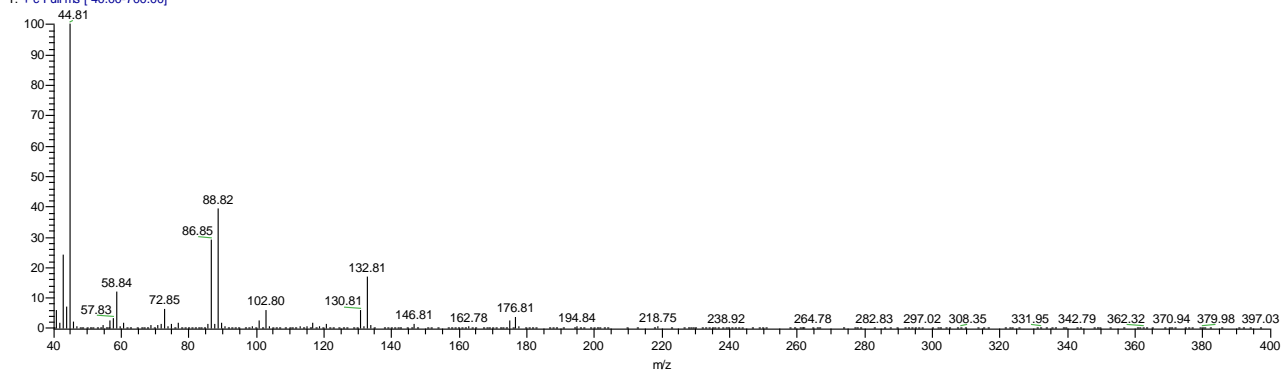

GM-1080126-(2)-TEMPO #1443-1449 RT: 17.86-17.92 AV: 7 SB: 11 18.00-18.10 NL: 3.65E6

T: + c Full ms [ 40.00-700.00]

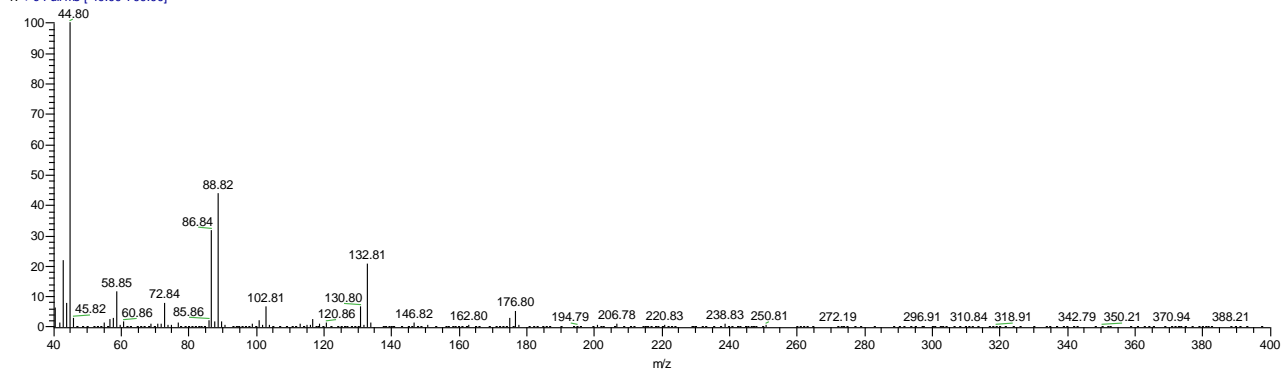

**Fig S2: GC-MS observed fragments of acetaldehyde, 2-oxopropanal, 2-oxopropanoic acid from PEG-400.**

### (3) Experimental Procedures

#### (i) General Experimental Procedure and Spectral Characterization for the Synthesis of 1-quinoxalin-2(1H)-one acetylation with PEG-400 as “CH<sub>3</sub>CO” Source

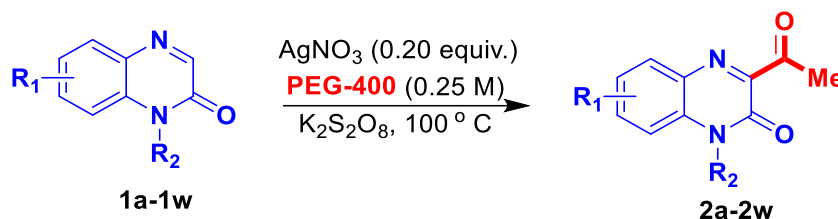

To an oven-dried sealed tube was charged with 1-methylquinoxalin-2(1H)-one **1a-1w**<sup>1</sup> (0.25 mmol), PEG-400 (0.25 M), and AgNO<sub>3</sub> (0.25 mmol) and allowed to stir at 100° C until the completion of the reaction (7 ~ 24 h) by TLC. After completion, the reaction mixture was cooled to room temperature and diluted with 5.0 mL of water. The water layer was extracted with (3X10 mL) of ethyl acetate, and the combined ethyl acetate layer was given brine wash (1X10 mL). The final ethyl acetate layer was dried over sodium sulfate and concentrated under reduced pressure to get the crude compound. The obtained crude was purified using column chromatography by eluting from (Hex/EA = 8/2) to afford pure heteroaryl acetylation **2a-2u** in 48%-76% yields.

#### (4) Spectral Characterization

**3-acetyl-1-methylquinoxalin-2(1H)-one (2a)**<sup>2</sup>: Following the general procedure, a 15 mL reaction tube was

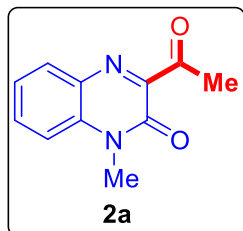

charged with 1-methylquinoxalin-2(1H)-one (1b) (35 mg, 0.2 mmol), PEG-400 (0.20 M), AgNO<sub>3</sub> (25 mol %) and K<sub>2</sub>S<sub>2</sub>O<sub>8</sub> (2.0 equiv) allowed to stir at 100° C until the completion of reaction by TLC. After completion, the reaction mixture was cooled to room temperature and diluted with 10 mL of water. The water layer was extracted with

(3X10 mL) of ethyl acetate and the combined ethyl acetate layer was given brine wash (1X10 mL). The final ethyl acetate layer was dried over sodium sulfate and concentrated under reduced pressure to get the crude compound. The obtained crude was purified using column chromatography by eluting from (Hex/EA = 8/2) to afford the corresponding 3-acetyl-1-methylquinoxalin-2(1H)-one (2a) as a yellow solid (30 mg, yield = 76 %); Mp. 116.2-116.9 °C; <sup>1</sup>H NMR (CDCl<sub>3</sub>, 400 MHz) δ 7.97-7.94 (m, 1H), 7.69 (ddd, *J* = 8.4, 7.2, 1.6 Hz, 1H), 7.41 (ddd, *J* = 8.4, 7.2, 1.2 Hz, 1H), 7.36 (dd, *J* = 8.4, 0.8 Hz, 1H), 3.73 (s, 3H), 2.72 (s, 3H); <sup>13</sup>C NMR (CDCl<sub>3</sub>, 100 MHz) δ 198.16, 152.83, 151.77, 134.42, 132.77, 131.88, 131.52, 124.15, 113.84, 29.02, 28.51.

**3-acetyl-1-ethylquinoxalin-2(1H)-one (2b):** Following the general procedure, a 15 mL reaction tube was

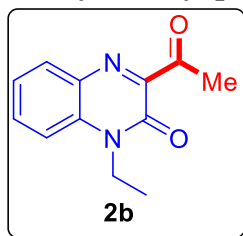

charged with 1-ethylquinoxalin-2(1H)-one (1b) (37 mg, 0.2 mmol), PEG-400 (0.25 M), AgNO<sub>3</sub> (20 mol %) and K<sub>2</sub>S<sub>2</sub>O<sub>8</sub> (2.0 equiv) allowed to stir at 100° C until the completion of reaction by TLC. After completion, the reaction mixture was cooled to room temperature and diluted with 10 mL of water. The water layer was extracted with

(3X10 mL) of ethyl acetate and the combined ethyl acetate layer was given brine wash (1X10 mL). The final ethyl acetate layer was dried over sodium sulfate and concentrated under reduced pressure to get the crude compound. The obtained crude was purified using column chromatography by eluting from (Hex/EA = 8/2) to afford the corresponding 3-acetyl-1-ethylquinoxalin-2(1H)-one (2b) as a yellow solid (31 mg, yield = 73 %); Mp. 122-122.5 °C; <sup>1</sup>H NMR (CDCl<sub>3</sub>, 400 MHz) δ 7.96 (dd, *J* = 8.0, 1.2 Hz, 1H), 7.70-7.65 (m, 1H), 7.41-7.37 (m, 2H), 4.35 (q, *J* = 7.2 Hz, 1H), 2.72 (s, 3H), 1.40 (t, *J* = 6.8 Hz, 3H); <sup>13</sup>C NMR (CDCl<sub>3</sub>, 100 MHz) δ 198.22, 152.34, 151.69, 133.42, 132.71, 132.17, 131.75, 123.93, 113.67, 37.39, 28.52, 12.34. HRMS (ESI) calcd for C<sub>12</sub> H<sub>12</sub> N<sub>2</sub> O<sub>2</sub> Na [M + Na]<sup>+</sup>: 239.0796; found: 239.0799.

**3-acetyl-1-allylquinoxalin-2(1H)-one (2c):** Following the general procedure, a 15 mL reaction tube was

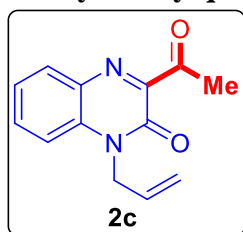

charged with 1-allylquinoxalin-2(1H)-one (1c) (40 mg, 0.2 mmol), PEG-400 (0.25 M), AgNO<sub>3</sub> (20 mol %) and K<sub>2</sub>S<sub>2</sub>O<sub>8</sub> (2.0 equiv) allowed to stir at 100° C until the completion of reaction by TLC. After completion, the reaction mixture was cooled to room temperature and diluted with 10 mL of water. The water layer was extracted with

(3X10 mL) of ethyl acetate and the combined ethyl acetate layer was given brine wash (1X10 mL). The final ethyl acetate layer was dried over sodium sulfate and concentrated under reduced pressure to get the crude compound. The obtained crude was purified using column chromatography by eluting from (Hex/EA = 8/2) to afford the corresponding 3-acetyl-1-allylquinoxalin-2(1H)-one (2c) as a yellow solid (29 mg, yield = 65 %); Mp. 136.1-137 °C; <sup>1</sup>H NMR (CDCl<sub>3</sub>, 400 MHz) δ 7.96 (ddd, *J* = 8.0, 1.2, 0.4 Hz, 1H), δ 7.65 (ddd, *J* = 8.4, 7.2, 1.2 Hz, 1H), 7.42-7.37 (m, 1H), 7.34 (dd, *J* = 8.4, 1.2, 1H), 5.97-5.90 (m, 1H), 5.32-5.28 (m, 1H), 5.23-5.18 (m, 1H), 4.93 (dt, *J* = 3.6, 2.0, 2H), 2.72 (s, 3H); <sup>13</sup>C NMR (CDCl<sub>3</sub>, 100 MHz) δ 198.01, 152.36, 151.61, 133.69, 132.68, 132.00, 131.56, 130.13, 124.11, 118.57, 114.39, 44.44, 28.51. HRMS (ESI) calcd for C<sub>13</sub> H<sub>12</sub> N<sub>2</sub> O<sub>2</sub> Na [M + Na]<sup>+</sup>: 251.0796; found: 251.0799.

**3-acetyl-1-(but-3-en-1-yl)quinoxalin-2(1H)-one (2d):** Following the general procedure, a 15 mL reaction

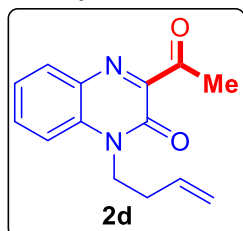

tube was charged with 1-(but-3-en-1-yl)quinoxalin-2(1H)-one (1d) (43 mg, 0.2 mmol), PEG-400 (0.25 M), AgNO<sub>3</sub> (20 mol %) and K<sub>2</sub>S<sub>2</sub>O<sub>8</sub> (2.0 equiv) allowed to stir at 100° C until the completion of reaction by TLC. After completion, the reaction mixture was cooled to room temperature and diluted with 10 mL of water. The water layer was

extracted with (3X10 mL) of ethyl acetate and the combined ethyl acetate layer was given brine wash (1X10

mL). The final ethyl acetate layer was dried over sodium sulfate and concentrated under reduced pressure to get the crude compound. The obtained crude was purified using column chromatography by eluting from (Hex/EA = 8/2) to afford the corresponding 3-acetyl-1-(but-3-en-1-yl)quinoxalin-2(1*H*)-one (2d) as a yellow solid (30 mg, yield = 63 %); Mp. 140.5-141.2°C; <sup>1</sup>H NMR (CDCl<sub>3</sub>, 400 MHz) δ 7.96 (dd, *J* = 8.0, 1.2 Hz, 1H), δ 7.68 (ddd, *J* = 8.4, 7.8, 1.6 Hz, 1H), 7.42-7.35 (m, 2H), 5.93-5.83 (m, 1H), 5.15-5.09 (m, 2H), 4.39-4.33 (m, 2H), 2.72 (s, 3H) 2.56-2.50 (m, 2H); <sup>13</sup>C NMR (CDCl<sub>3</sub>, 100 MHz) δ 198.11, 152.53, 151.68, 133.56, 132.70, 132.14, 131.81, 124.01, 117.92, 113.78, 41.60, 31.42, 28.51. HRMS (ESI) calcd for C<sub>12</sub> H<sub>12</sub> N<sub>2</sub> O<sub>2</sub> Na [M + Na]<sup>+</sup>: 265.0796; found: 265.0799.

**3-acetyl-1-(2-methylallyl)quinoxalin-2(1*H*)-one (2e):** Following the general procedure, a 15 mL reaction

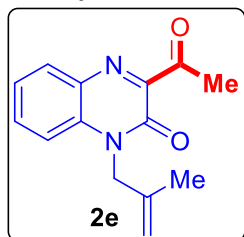

tube was charged with 1-(2-methylallyl)quinoxalin-2(1*H*)-one (1e) (43 mg, 0.2 mmol), PEG-400 (0.25 M), AgNO<sub>3</sub> (20 mol %) and K<sub>2</sub>S<sub>2</sub>O<sub>8</sub> (2.0 equiv) allowed to stir at 100° C until the completion of reaction by TLC. After completion, the reaction mixture was cooled to room temperature and diluted with 10 mL of water. The water layer was

extracted with (3X10 mL) of ethyl acetate and the combined ethyl acetate layer was given brine wash (1X10 mL). The final ethyl acetate layer was dried over sodium sulfate and concentrated under reduced pressure to get the crude compound. The obtained crude was purified using column chromatography by eluting from (Hex/EA = 8/2) to afford the corresponding 3-acetyl-1-(2-methylallyl)quinoxalin-2(1*H*)-one (2e) as a yellow solid (28 mg, yield = 58 %); Mp. 132.5-132.9 °C; <sup>1</sup>H NMR (CDCl<sub>3</sub>, 400 MHz) δ 7.96 (ddd, *J* = 8.0, 1.2, 0.4 Hz, 1H), δ 7.62 (ddd, *J* = 6.8, 3.6, 1.6 Hz, 1H), 7.41-7.37 (m, 1H), 7.28-7.26 (m, 1H), 4.84 (s, 2H), 4.62 (dt, *J* = 1.6, 0.8 Hz 1H), 2.73 (s, 3H), 1.83 (s, 3H); <sup>13</sup>C NMR (CDCl<sub>3</sub>, 100 MHz) δ 198.03, 152.56, 151.82, 137.82, 133.93, 132.61, 132.01, 131.50, 124.15, 114.68, 112.20, 77.31, 76.99, 76.68, 47.55, 28.58, 20.17. HRMS (ESI) calcd for C<sub>12</sub> H<sub>12</sub> N<sub>2</sub> O<sub>2</sub> Na [M + Na]<sup>+</sup>: 266.1693; found: 266.1696.

**3-acetyl-1-(prop-2-yn-1-yl)quinoxalin-2(1*H*)-one (2f):** Following the general procedure, a 15 mL reaction

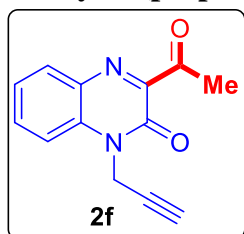

tube was charged with 1-(prop-2-yn-1-yl)quinoxalin-2(1*H*)-one (1f) (40 mg, 0.2 mmol), PEG-400 (0.25 M), AgNO<sub>3</sub> (20 mol %) and K<sub>2</sub>S<sub>2</sub>O<sub>8</sub> (2.0 equiv) allowed to stir at 100° C until the completion of reaction by TLC. After completion, the reaction mixture was cooled to room temperature and diluted with 10 mL of water. The water layer was

extracted with (3X10 mL) of ethyl acetate and the combined ethyl acetate layer was given brine wash (1X10 mL). The final ethyl acetate layer was dried over sodium sulfate and concentrated under reduced pressure to get the crude compound. The obtained crude was purified using column chromatography by eluting from (Hex/EA = 8/2) to afford the corresponding 3-acetyl-1-(prop-2-yn-1-yl)quinoxalin-2(1*H*)-one (2f) as a yellow solid (32 mg, yield = 71 %); Mp. 106.2-106.7 °C; <sup>1</sup>H NMR (CDCl<sub>3</sub>, 400 MHz) δ 7.97 (dd, *J* = 8.0, 1.6 Hz, 1H), 7.74-7.69 (m, 1H), 7.52 (d, *J* = 8.8, 1H), 7.46-7.42 (m, 1H), 5.08 (d, *J* = 2.8, 2H), 2.72 (s, 3H); <sup>13</sup>C NMR

(CDCl<sub>3</sub>, 100 MHz)  $\delta$  13C NMR (101 MHz, cdcl3)  $\delta$  197.64, 151.75, 151.42, 132.95, 132.91, 132.05, 131.66, 124.52, 114.39, 76.27, 73.58, 31.33, 28.46. HRMS (ESI) calcd for C<sub>13</sub> H<sub>10</sub> N<sub>2</sub> O<sub>2</sub> Na [M + Na]<sup>+</sup>: 249.0640; found: 249.0642.

**ethyl 2-(3-acetyl-2-oxoquinoxalin-1(2H)-yl)acetate (2g)**<sup>2</sup>: Following the general procedure, a 15 mL

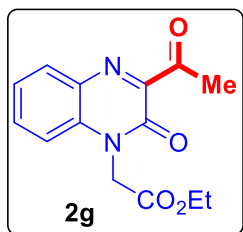

reaction tube was charged with ethyl 2-(2-oxoquinoxalin-1(2H)-yl)acetate (1g) (49 mg, 0.2 mmol), PEG-400 (0.25 M), AgNO<sub>3</sub> (20 mol %) and K<sub>2</sub>S<sub>2</sub>O<sub>8</sub> (2.0 equiv) allowed to stir at 100° C until the completion of reaction by TLC. After completion, the reaction mixture was cooled to room temperature and diluted with 10 mL of water. The water layer was extracted with (3X10 mL) of ethyl acetate and the combined ethyl acetate

layer was given brine wash (1X10 mL). The final ethyl acetate layer was dried over sodium sulfate and concentrated under reduced pressure to get the crude compound. The obtained crude was purified using column chromatography by eluting from (Hex/EA = 8/2) to afford the corresponding ethyl 2-(3-acetyl-2-oxoquinoxalin-1(2H)-yl)acetate (2g) as a yellow solid (37 mg, yield = 67 %); Mp. 107.1-107.6 °C; <sup>1</sup>H NMR (CDCl<sub>3</sub>, 400 MHz)  $\delta$  7.98 (dd, *J* = 8.0, 1.2 Hz, 1H), 7.65 (ddd, *J* = 8.4, 7.2, 1.6 Hz, 1H), 7.42 (ddd, *J* = 8.47, 1.2 Hz, 1H), 7.12 (dd, *J* = 8.4, 0.8 Hz, 1H), 5.02 (s, 2H), 4.26 (q, *J* = 7.2 Hz, 2H), 2.72 (s, 3H), 1.28 (t, *J* = 7.2 Hz, 3H); <sup>13</sup>C NMR (CDCl<sub>3</sub>, 100 MHz)  $\delta$  197.57, 166.65, 152.30, 151.14, 133.68, 133.00, 131.90, 131.85, 124.42, 113.34, 62.24, 43.30, 28.41, 14.06.

**3-acetyl-1-(2-oxo-2-phenylethyl)quinoxalin-2(1H)-one (2h)**: Following the general procedure, a 15 mL

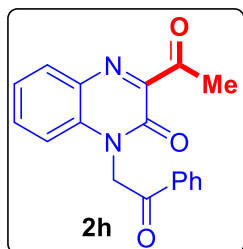

reaction tube was charged with 1-(2-oxo-2-phenylethyl)quinoxalin-2(1H)-one (1h) (55 mg, 0.2 mmol), PEG-400 (0.25 M), AgNO<sub>3</sub> (20 mol %) and K<sub>2</sub>S<sub>2</sub>O<sub>8</sub> (2.0 equiv) allowed to stir at 100° C until the completion of reaction by TLC. After completion, the reaction mixture was cooled to room temperature and diluted with 10 mL of water. The water layer was extracted with (3X10 mL) of ethyl acetate and the combined ethyl acetate

layer was given brine wash (1X10 mL). The final ethyl acetate layer was dried over sodium sulfate and concentrated under reduced pressure to get the crude compound. The obtained crude was purified using column chromatography by eluting from (Hex/EA = 8/2) to afford the corresponding 3-acetyl-1-(2-oxo-2-phenylethyl)quinoxalin-2(1H)-one (2h) as a yellow solid (29 mg, yield = 48 %); Mp. 138.2-139.1 °C; <sup>1</sup>H NMR (CDCl<sub>3</sub>, 400 MHz)  $\delta$  8.07-8.05 (m, 1H), 8.02-8.00 (m, 2H), 7.68-7.57 (m, 4H), 7.53-7.50 (m, 2H), 5.86 (s, 2H), 2.85 (s, 3H); <sup>13</sup>C NMR (CDCl<sub>3</sub>, 100 MHz)  $\delta$  198.39, 192.77, 153.89, 141.67, 140.96, 137.93, 134.46, 133.74, 131.99, 129.65, 128.81, 127.80, 127.56, 126.79, 68.02, 28.43. HRMS (ESI) calcd for C<sub>18</sub>H<sub>14</sub>N<sub>2</sub>O<sub>3</sub> Na [M + Na]<sup>+</sup>: 329.0902; found: 329.0905.



**3-acetyl-1-benzylquinoxalin-2(1H)-one (2i):** Following the general procedure, a 15 mL reaction tube was

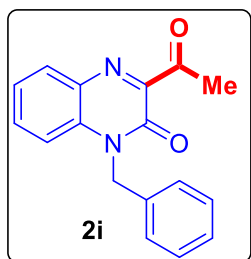

charged with 1-benzylquinoxalin-2(1H)-one (1i) (50 mg, 0.2 mmol), PEG-400 (0.25 M), AgNO<sub>3</sub> (20 mol %) and K<sub>2</sub>S<sub>2</sub>O<sub>8</sub> (2.0 equiv) allowed to stir at 100° C until the completion of reaction by TLC. After completion, the reaction mixture was cooled to room temperature and diluted with 10 mL of water. The water layer was extracted with

(3X10 mL) of ethyl acetate and the combined ethyl acetate layer was given brine wash (1X10 mL). The final ethyl acetate layer was dried over sodium sulfate and concentrated under reduced pressure to get the crude compound. The obtained crude was purified using column chromatography by eluting from (Hex/EA = 8/2) to afford the corresponding 3-acetyl-1-benzylquinoxalin-2(1H)-one (2i) as a yellow solid (38 mg, yield = 69 %); Mp. 129.7-130.1 °C; <sup>1</sup>H NMR (CDCl<sub>3</sub>, 400 MHz) δ 7.96 (ddd, *J* = 8.0, 1.6, 0.4 Hz, 1H), 7.55 (ddd, *J* = 8.8, 7.2, 1.6 Hz, 1H), 7.38-7.35 (m, 1H), 7.34-7.31 (m, 2H), 7.29-7.25 (m, 4H), 5.51 (s, 2H) 2.75 (s, 3H); <sup>13</sup>C NMR (CDCl<sub>3</sub>, 100 MHz) δ 198.01, 152.90, 151.70, 134.74, 133.82, 132.75, 132.12, 131.61, 128.96, 127.85, 126.96, 124.18, 114.63, 45.83, 28.52. HRMS (ESI) calcd for C<sub>17</sub> H<sub>14</sub> N<sub>2</sub> O<sub>2</sub> Na [M + Na]<sup>+</sup>: 301.0953; found: 301.0956.

**3-acetyl-1-(4-methylbenzyl)quinoxalin-2(1H)-one (2j):** Following the general procedure, a 15 mL reaction

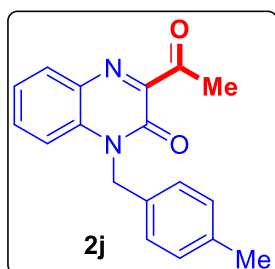

tube was charged with 1-(4-methylbenzyl)quinoxalin-2(1H)-one (1j) (53 mg, 0.2 mmol), PEG-400 (0.25 M), AgNO<sub>3</sub> (20 mol %) and K<sub>2</sub>S<sub>2</sub>O<sub>8</sub> (2.0 equiv) allowed to stir at 100° C until the completion of reaction by TLC. After completion, the reaction mixture was cooled to room temperature and diluted with 10 mL of water. The water layer was extracted with (3X10 mL) of ethyl acetate and the combined ethyl acetate

layer was given brine wash (1X10 mL). The final ethyl acetate layer was dried over sodium sulfate and concentrated under reduced pressure to get the crude compound. The obtained crude was purified using column chromatography by eluting from (Hex/EA = 8/2) to afford the corresponding 3-acetyl-1-(4-methylbenzyl)quinoxalin-2(1H)-one (2j) as a yellow solid (38 mg, yield = 66 %); Mp. 132.4-133.6 °C; <sup>1</sup>H NMR (CDCl<sub>3</sub>, 400 MHz) δ 7.96-7.93 (m, 1H), 7.55 (ddd, *J* = 8.8, 7.6, 1.6 Hz, 1H), 7.37-7.32 (m, 2H), 7.18-7.11 (m, 4H), 5.47 (s, 2H), 2.75 (s, 3H), 2.30 (s, 3H); <sup>13</sup>C NMR (CDCl<sub>3</sub>, 100 MHz) δ 198.07, 152.93, 151.76, 137.65, 133.86, 132.71, 132.14, 131.75, 131.59, 129.61, 127.01, 124.12, 114.66, 45.64, 28.55, 21.05. HRMS (ESI) calcd for C<sub>18</sub> H<sub>16</sub> N<sub>2</sub> O<sub>2</sub> Na [M + Na]<sup>+</sup>: 315.1109; found: 315.1109.

**3-acetyl-1-(3-methoxybenzyl)quinoxalin-2(1H)-one (2k):** Following the general procedure, a 15 mL

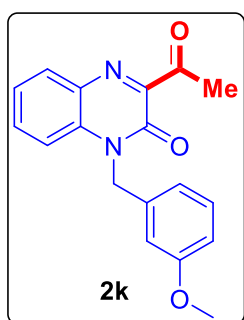

reaction tube was charged with 1-(3-methoxybenzyl)quinoxalin-2(1H)-one (1k) (56 mg, 0.2 mmol), PEG-400 (0.25 M), AgNO<sub>3</sub> (20 mol %) and K<sub>2</sub>S<sub>2</sub>O<sub>8</sub> (2.0 equiv) allowed to stir at 100° C until the completion of reaction by TLC. After completion, the reaction mixture was cooled to room temperature and diluted with 10 mL of water. The water

layer was extracted with (3X10 mL) of ethyl acetate and the combined ethyl acetate layer was given brine wash (1X10 mL). The final ethyl acetate layer was dried over sodium sulfate and concentrated under reduced pressure to get the crude compound. The obtained crude was purified using column chromatography by eluting from (Hex/EA = 8/2) to afford the corresponding 3-acetyl-1-(3-methoxybenzyl)quinoxalin-2(1*H*)-one (2k) as a yellow solid (34 mg, yield = 55 %); Mp. 142.1-143 °C; <sup>1</sup>H NMR (CDCl<sub>3</sub>, 400 MHz) δ 7.96 (dd, *J* = 7.6, 1.6 Hz, 1H), 7.57-7.53 (m, 1H), 7.38-7.34 (m, 1H), 7.31-7.29 (m, 1H), , 7.24-7.22 (m, 1H), , 6.84- 6.78 (m, 3H), 5.48 (s, 2H), 3.76 (s, 3H), 2.75 (s, 3H); <sup>13</sup>C NMR (CDCl<sub>3</sub>, 100 MHz) δ 198.00, 160.05, 151.73, 136.36, 133.88, 132.78, 132.15, 131.64, 130.08, 124.21, 119.14, 114.68, 113.04, 112.79, 77.31, 76.99, 76.67, 55.26, 45.81, 28.56. HRMS (ESI) calcd for C<sub>18</sub> H<sub>16</sub> N<sub>2</sub> O<sub>3</sub> Na [M + Na]<sup>+</sup>: 331.1059; found: 331.1060.

**3-acetyl-1-(3-chlorobenzyl)quinoxalin-2(1*H*)-one (2l):** Following the general procedure, a 15 mL reaction

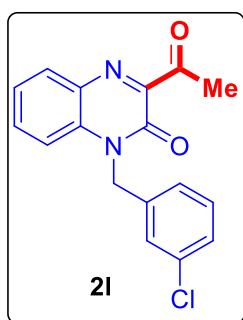

tube was charged with 1-(3-chlorobenzyl)quinoxalin-2(1*H*)-one (1l) (57 mg, 0.2 mmol), PEG-400 (0.25 M), AgNO<sub>3</sub> (20 mol %) and K<sub>2</sub>S<sub>2</sub>O<sub>8</sub> (2.0 equiv) allowed to stir at 100° C until the completion of reaction by TLC. After completion, the reaction mixture was cooled to room temperature and diluted with 10 mL of water. The water layer was extracted with (3X10 mL) of ethyl acetate and the combined ethyl acetate layer was given brine wash (1X10 mL). The final ethyl acetate layer was dried over sodium sulfate

and concentrated under reduced pressure to get the crude compound. The obtained crude was purified using column chromatography by eluting from (Hex/EA = 8/2) to afford the corresponding 3-acetyl-1-(3-chlorobenzyl)quinoxalin-2(1*H*)-one (2l) as a yellow solid (38 mg, yield = 61 %); Mp. 136.4-137 °C; <sup>1</sup>H NMR (CDCl<sub>3</sub>, 400 MHz) δ 7.98-7.95 (m, 1H), 7.59-7.54 (m, 1H), 7.40-7.36 (m, 1H), 7.30-7.26 (m, 3H), 7.23-7.20 (m, 2H), 5.47 (s, 2H), 2.75 (s, 3H); <sup>13</sup>C NMR (CDCl<sub>3</sub>, 100 MHz) <sup>13</sup>C NMR (101 MHz, cdcl<sub>3</sub>) <sup>13</sup>C NMR (101 MHz, cdcl<sub>3</sub>) δ 197.84, 152.80, 151.58, 133.83, 133.66, 133.29, 132.86, 132.13, 131.79, 129.18, 128.49, 124.35, 114.37, 45.26. 28.45. HRMS (ESI) calcd for C<sub>17</sub> H<sub>13</sub> N<sub>2</sub> O<sub>2</sub> Cl Na [M + Na]<sup>+</sup>: 335.0563; found: 335.0567.

**3-acetyl-1-(4-fluorobenzyl)quinoxalin-2(1*H*)-one (2m):** Following the general procedure, a 15 mL reaction

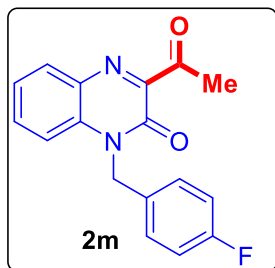

tube was charged with 1-(4-fluorobenzyl)quinoxalin-2(1*H*)-one (1m) (54 mg, 0.2 mmol), PEG-400 (0.25 M), AgNO<sub>3</sub> (20 mol %) and K<sub>2</sub>S<sub>2</sub>O<sub>8</sub> (2.0 equiv) allowed to stir at 100° C until the completion of reaction by TLC. After completion, the reaction mixture was cooled to room temperature and diluted with 10 mL of water. The water

layer was extracted with (3X10 mL) of ethyl acetate and the combined ethyl acetate layer was given brine wash (1X10 mL). The final ethyl acetate layer was dried over sodium sulfate and concentrated under reduced pressure to get the crude compound. The obtained crude was purified using column chromatography by eluting from (Hex/EA = 8/2) to afford the corresponding 3-acetyl-1-(4-

fluorobenzyl)quinoxalin-2(1*H*)-one (2m) as a yellow solid (32 mg, yield = 54 %); Mp. 129.1-130 °C; <sup>1</sup>H NMR (CDCl<sub>3</sub>, 400 MHz) δ 7.97 (dd, *J* = 8.0, 0.4 Hz, 1H), 7.58 (ddd, *J* = 8.8, 7.2, 0.4 Hz, 1H), 7.38 (ddd, *J* = 8.0, 7.2, 0.8 Hz, 1H), 7.31-7.25 (m, 3H), 7.03-6.99 (m, 2H), 5.47 (s, 2H), 2.74 (s, 3H); <sup>13</sup>C NMR (CDCl<sub>3</sub>, 100 MHz) δ 197.89, 163.51, (d, *J<sub>F</sub>* = 245 Hz), 161.06, 152.84 (d, *J<sub>F</sub>* = 119 Hz), 151.65, 133.72, 132.82, 132.15, 131.77, 130.56, 130.53, 128.97, (d, *J<sub>F</sub>* = 8 Hz), 128.89, 124.30, 116.06, (d, *J<sub>F</sub>* = 21.7 Hz), 115.85, 114.40, 45.22, 28.47. HRMS (ESI) calcd for C<sub>17</sub> H<sub>13</sub> N<sub>2</sub> O<sub>2</sub> F Na [M + Na]<sup>+</sup>: 319.0859; found: 319.0863

**3-acetyl-1-(4-(trifluoromethyl)benzyl)quinoxalin-2(1*H*)-one (2n):** Following the general procedure, a 15

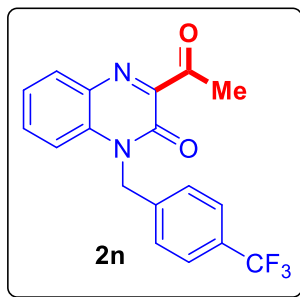

mL reaction tube was charged with 1-(4-(trifluoromethyl)benzyl)quinoxalin-2(1*H*)-one (1n) (64 mg, 0.2 mmol), PEG-400 (0.25 M), AgNO<sub>3</sub> (20 mol %) and K<sub>2</sub>S<sub>2</sub>O<sub>8</sub> (2.0 equiv) allowed to stir at 100° C until the completion of reaction by TLC. After completion, the reaction mixture was cooled to room temperature and diluted with 10 mL of water. The water layer was extracted with (3X10 mL) of ethyl acetate and the combined ethyl acetate layer was given brine wash (1X10 mL). The final ethyl

acetate layer was dried over sodium sulfate and concentrated under reduced pressure to get the crude compound. The obtained crude was purified using column chromatography by eluting from (Hex/EA = 8/2) to afford the corresponding 3-acetyl-1-(4-(trifluoromethyl)benzyl)quinoxalin-2(1*H*)-one (2n) as a yellow solid (36 mg, yield = 52 %); Mp. 130.1-131.3 °C; <sup>1</sup>H NMR (CDCl<sub>3</sub>, 400 MHz) δ 7.99 (dd, *J* = 8.0, 0.4 Hz, 1H), 7.58 (ddd, *J* = 8.4, 7.2, 1.2 Hz, 3H), 7.40 (ddd, *J* = 8.0, 7.2, 1.2 Hz, 3H), 7.23 (dd, *J* = 8.8, 1.2 Hz, 1H), 5.56 (s, 2H), 2.75 (s, 3H); <sup>13</sup>C NMR (CDCl<sub>3</sub>, 100 MHz) δ 197.74, 152.76, 151.51, 138.78, 133.61, 132.98, 132.12, 131.86, 130.44, 130.11(q, *J* = 28.6 Hz), 127.32, 126.05, 126.01, 125.98, 125.94 (q, *J* = 3.7 Hz), 124.47, 122.449 (q, *J* = 270.4 Hz), 114.25, 45.45, 29.67, 28.41. HRMS (ESI) calcd for C<sub>18</sub> H<sub>13</sub> N<sub>2</sub> F<sub>3</sub> O<sub>2</sub> Na [M + Na]<sup>+</sup>: 369.0827; found: 369.0831.

**3-acetyl-1-(2,4-dichlorobenzyl)quinoxalin-2(1*H*)-one (2o):** Following the general procedure, a 15 mL

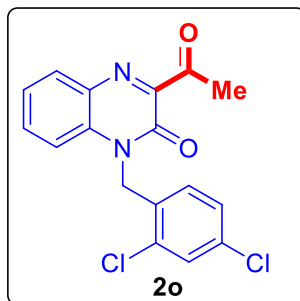

reaction tube was charged with 1-(2,4-dichlorobenzyl)quinoxalin-2(1*H*)-one (1o) (63 mg, 0.2 mmol), PEG-400 (0.25 M), AgNO<sub>3</sub> (20 mol %) and K<sub>2</sub>S<sub>2</sub>O<sub>8</sub> (2.0 equiv) allowed to stir at 100° C until the completion of reaction by TLC. After completion, the reaction mixture was cooled to room temperature and diluted with 10 mL of water. The water layer was extracted with (3X10 mL) of ethyl acetate and the combined ethyl acetate layer was given brine wash (1X10 mL). The final ethyl

acetate layer was dried over sodium sulfate and concentrated under reduced pressure to get the crude compound. The obtained crude was purified using column chromatography by eluting from (Hex/EA = 8/2) to afford the corresponding 3-acetyl-1-(2,4-dichlorobenzyl)quinoxalin-2(1*H*)-one (2o) as a yellow solid (42 mg, yield = 61 %); Mp. 125.2-126 °C; <sup>1</sup>H NMR (CDCl<sub>3</sub>, 400 MHz) δ 8.00-7.98 (m, 1H), 7.57 (ddd, *J* = 8.4,

7.2, 1.6 Hz, 1H), 7.48 (d,  $J=2.0$  Hz, 1H), 7.40 (ddd,  $J = 8.4, 7.6, 1.2$  Hz, 1H), 7.09 (ddd,  $J = 8.4, 7.2, 2.4$  Hz, 2H), 6.75 (dd,  $J = 8.4$  Hz, 1H), 5.53 (s, 2H), 2.75 (s, 3H);  $^{13}\text{C}$  NMR ( $\text{CDCl}_3$ , 100 MHz)  $\delta$  197.67, 152.81, 151.48, 134.28, 133.40, 133.29, 133.12, 132.10, 131.78, 130.54, 129.67, 128.04, 127.75, 124.58, 114.31, 77.31, 76.99, 76.67, 43.00, 28.44. HRMS (ESI) calcd for  $\text{C}_{12}\text{H}_{12}\text{N}_2\text{O}_2\text{Cl}_2\text{Na}$   $[\text{M} + \text{Na}]^+$ : 369.0174; found 369.0173.

**3-acetyl-1-(naphthalen-2-ylmethyl)quinoxalin-2(1H)-one (2p)**: Following the general procedure, a 15 mL

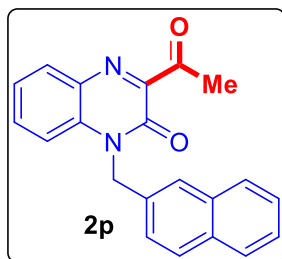

reaction tube was charged with 1-(naphthalen-2-ylmethyl)quinoxalin-2(1H)-one (1o) (60 mg, 0.2 mmol), PEG-400 (0.25 M),  $\text{AgNO}_3$  (20 mol %) and  $\text{K}_2\text{S}_2\text{O}_8$  (2.0 equiv) allowed to stir at  $100^\circ\text{C}$  until the completion of reaction by TLC. After completion, the reaction mixture was cooled to room temperature and diluted with 10 mL of water. The water layer was extracted with (3X10 mL) of ethyl acetate and the combined

ethyl acetate layer was given brine wash (1X10 mL). The final ethyl acetate layer was dried over sodium sulfate and concentrated under reduced pressure to get the crude compound. The obtained crude was purified using column chromatography by eluting from (Hex/EA = 8/2) to afford the corresponding 3-acetyl-1-(naphthalen-2-ylmethyl)quinoxalin-2(1H)-one (2p) as a yellow solid (43 mg, yield = 65 %); Mp  $167.9\text{-}168.3^\circ\text{C}$ ;  $^1\text{H}$  NMR ( $\text{CDCl}_3$ , 400 MHz)  $\delta$  7.98-7.95 (m, 1H), 7.82-7.79 (m, 2H), 7.75 (dd,  $J = 8.8, 3.2$  Hz, 1H), 7.66 (s, 1H) 7.54-7.49 (m, 1H), 7.47-7.45 (m, 2H), 7.41 (dd,  $J = 8.4, 1.6$  Hz, 1H), 7.37 (s, 1H), 7.35 (d,  $J=1.2$  Hz, 1H), 5.67 (s, 2H) 2.78 (s, 3H);  $^{13}\text{C}$  NMR ( $\text{CDCl}_3$ , 100 MHz)  $\delta$  198.03, 153.02, 151.75, 133.89, 133.26, 132.80, 132.25, 132.20, 131.67, 129.01, 127.71, 126.51, 126.24, 125.82, 124.71, 124.23, 46.10, 28.55. HRMS (ESI) calcd for  $\text{C}_{21}\text{H}_{16}\text{N}_2\text{O}_2\text{Na}$   $[\text{M} + \text{Na}]^+$ : 351.1109; found: 351.1108.

**3-acetyl-7-chloro-1-methylquinoxalin-2(1H)-one (2q)**: Following the general procedure, a 15 mL reaction

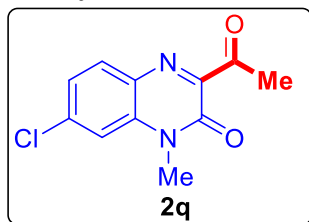

tube was charged with 7-chloro-1-methylquinoxalin-2(1H)-one (1p) (41 mg, 0.2 mmol), PEG-400 (0.25 M),  $\text{AgNO}_3$  (20 mol %) and  $\text{K}_2\text{S}_2\text{O}_8$  (2.0 equiv) allowed to stir at  $100^\circ\text{C}$  until the completion of reaction by TLC. After completion, the reaction mixture was cooled to room temperature and diluted with 10 mL of water.

The water layer was extracted with (3X10 mL) of ethyl acetate and the combined ethyl acetate layer was given brine wash (1X10 mL). The final ethyl acetate layer was dried over sodium sulfate and concentrated under reduced pressure to get the crude compound. The obtained crude was purified using column chromatography by eluting from (Hex/EA = 8/2) to afford the corresponding 3-acetyl-7-chloro-1-methylquinoxalin-2(1H)-one (2q) as a yellow solid (28 mg, yield = 59 %); Mp  $191.4\text{-}192^\circ\text{C}$ ;  $^1\text{H}$  NMR ( $\text{CDCl}_3$ , 400 MHz)  $\delta$  7.94 (d,  $J = 2.4$  Hz, 1H), 7.63 (dd,  $J = 9.2, 2.4$  Hz, 1H), 7.30 (d,  $J = 8.8$  Hz, 1H), 3.71 (s, 3H), 2.69 (s, 3H);  $^{13}\text{C}$  NMR ( $\text{CDCl}_3$ , 100 MHz)  $\delta$  197.72, 152.88, 152.38, 133.07, 132.68, 132.28, 130.51,

129.54, 115.03, 29.22, 28.38. HRMS (ESI) calcd for C<sub>11</sub> H<sub>9</sub> N<sub>2</sub> O<sub>2</sub> Cl Na [M + Na]<sup>+</sup>: 259.0250; found: 259.0252.

**3-acetyl-7-Bromo-1-methylquinoxalin-2(1H)-one (2r)**: Following the general procedure, a 15 mL reaction

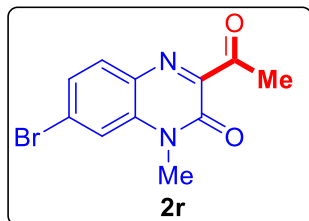

tube was charged with 7-Bromo-1-methylquinoxalin-2(1H)-one (1q) (51 mg, 0.2 mmol), PEG-400 (0.25 M), AgNO<sub>3</sub> (20 mol %) and K<sub>2</sub>S<sub>2</sub>O<sub>8</sub> (2.0 equiv) allowed to stir at 100° C until the completion of reaction by TLC. After completion, the reaction mixture was cooled to room temperature and diluted with 10 mL of water.

The water layer was extracted with (3X10 mL) of ethyl acetate, and the combined ethyl acetate layer was given brine wash (1X10 mL). The final ethyl acetate layer was dried over sodium sulfate and concentrated under reduced pressure to get the crude compound. The obtained crude was purified using column chromatography by eluting from (Hex/EA = 8/2) to afford the corresponding 3-acetyl-7-Bromo-1-methylquinoxalin-2(1H)-one (2r) as a yellow solid (35 mg, yield = 63 %); Mp 188-189.2 °C; <sup>1</sup>H NMR (CDCl<sub>3</sub>, 400 MHz) δ 8.10 (d, *J* = 2.4 Hz, 1H), 7.76 (dd, *J* = 8.8, 2.4 Hz, 1H), 7.24 (d, *J* = 9.2 Hz, 1H), 3.70 (s, 3H), 2.69 (s, 3H); <sup>13</sup>C NMR (CDCl<sub>3</sub>, 100 MHz) δ 197.65, 152.80, 152.38, 135.39, 133.62, 133.53, 132.59, 116.71, 115.29, 29.19, 28.35. HRMS (ESI) calcd for C<sub>11</sub> H<sub>9</sub> N<sub>2</sub> O<sub>2</sub> Br Na [M + Na]<sup>+</sup>: 302.9745; found: 302.9746.

**3-acetyl-1-methyl-7-(trifluoromethyl)quinoxalin-2(1H)-one (2s)**: Following the general procedure, a 15

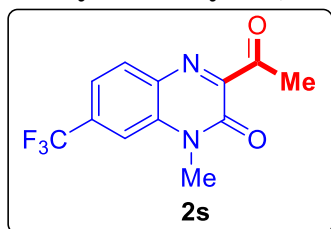

mL reaction tube was charged with 1-methyl-7-(trifluoromethyl)quinoxalin-2(1H)-one (1r) (48 mg, 0.2 mmol), PEG-400 (0.25 M), AgNO<sub>3</sub> (20 mol %) and K<sub>2</sub>S<sub>2</sub>O<sub>8</sub> (2.0 equiv) allowed to stir at 100° C until the completion of reaction by TLC. After completion, the reaction mixture was cooled to room temperature and

diluted with 10 mL of water. The water layer was extracted with (3X10 mL) of ethyl acetate and the combined ethyl acetate layer was given brine wash (1X10 mL). The final ethyl acetate layer was dried over sodium sulfate and concentrated under reduced pressure to get the crude compound. The obtained crude was purified using column chromatography by eluting from (Hex/EA = 8/2) to afford the corresponding 3-acetyl-1-methyl-7-(trifluoromethyl)quinoxalin-2(1H)-one (2s) as a yellow solid (32 mg, yield = 59 %); Mp. 170-170.6 °C; <sup>1</sup>H NMR (CDCl<sub>3</sub>, 400 MHz) δ 8.23 (d, *J* = 1.6 Hz, 1H), 7.89 (dd, *J* = 8.8, 2.0 Hz, 1H), 7.48 (d, *J* = 8.8 Hz, 1H), 3.75 (s, 3H), 2.70 (s, 3H); <sup>13</sup>C NMR (CDCl<sub>3</sub>, 100 MHz) δ 197.36, 153.07, 152.44, 136.61, 131.09, 128.85, 128.81, 128.77, 128.73 (q, *J* = 3.4 Hz), 127.44(q, *J* = 41.6 Hz), 126.66, 126.33, 124.72, 125.99 (q, *J* = 33.7 Hz), 122.02(q, *J* = 270.1 Hz), 114.66, 29.30, 28.25. HRMS (ESI) calcd for C<sub>12</sub> H<sub>10</sub> N<sub>2</sub> O<sub>2</sub> F<sub>3</sub> [M + H]<sup>+</sup>: 271.0694; found: 271.0697.

**3-acetyl-1-methyl-7-phenylquinoxalin-2(1H)-one (2t)**: Following the general procedure, a 15 mL reaction

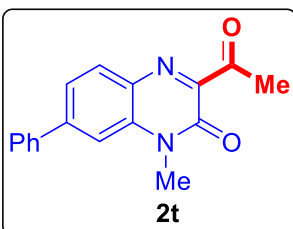

tube was charged with 1-methyl-7-phenylquinoxalin-2(1H)-one (1s) (50 mg, 0.2 mmol), PEG-400 (0.25 M), AgNO<sub>3</sub> (20 mol %) and K<sub>2</sub>S<sub>2</sub>O<sub>8</sub> (2.0 equiv) allowed to

stir at 100° C until the completion of reaction by TLC. After completion, the reaction mixture was cooled to room temperature and diluted with 10 mL of water. The water layer was extracted with (3X10 mL) of ethyl acetate and the combined ethyl acetate layer was given brine wash (1X10 mL). The final ethyl acetate layer was dried over sodium sulfate and concentrated under reduced pressure to get the crude compound. The obtained crude was purified using column chromatography by eluting from (Hex/EA = 8/2) to afford the corresponding 3-acetyl-1-methyl-7-phenylquinoxalin-2(1*H*)-one (2t) as a yellow solid (32 mg, yield = 58 %); Mp 178-178.9 °C; <sup>1</sup>H NMR (CDCl<sub>3</sub>, 400 MHz) δ 8.19 (d, *J* = 2.4 Hz, 1H), 7.93 (dd, *J* = 8.8, 2.4 Hz, 1H), 7.67-7.64 (m, 2H), 7.52-7.47 (m, 2H), 7.44-7.38 (m, 2H), 3.76 (s, 3H), 2.73 (s, 3H); <sup>13</sup>C NMR (CDCl<sub>3</sub>, 100 MHz) δ 198.07, 152.78, 152.12, 138.72, 137.34, 133.55, 132.17, 131.63, 129.29, 129.11, 127.95, 126.89, 114.28, 29.15, 28.54. HRMS (ESI) calcd for C<sub>12</sub> H<sub>12</sub> N<sub>2</sub> O<sub>2</sub> Na [M + Na]<sup>+</sup>: 301.1106; found: 301.1107.

**3-acetyl-1-methyl-7-(p-tolyl)quinoxalin-2(1*H*)-one (2u):** Following the general procedure, a 15 mL reaction

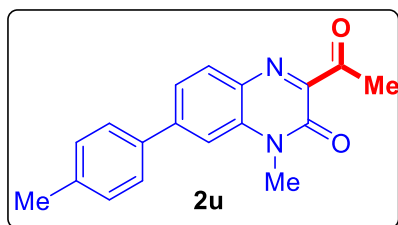

tube was charged with 1-methyl-7-(p-tolyl)quinoxalin-2(1*H*)-one (1t) (53 mg, 0.2 mmol), PEG-400 (0.25 M), AgNO<sub>3</sub> (20 mol %) and K<sub>2</sub>S<sub>2</sub>O<sub>8</sub> (2.0 equiv) and allowed to stir at 100° C until the completion of reaction by TLC. After completion, the reaction mixture was cooled to room temperature and diluted with 10 mL of water. The water layer was extracted with (3X10 mL)

of ethyl acetate and the combined ethyl acetate layer was given brine wash (1X10 mL). The final ethyl acetate layer was dried over sodium sulfate and concentrated under reduced pressure to get the crude compound. The obtained crude was purified using column chromatography by eluting from (Hex/EA = 8/2) to afford the corresponding 3-acetyl-1-methyl-7-(p-tolyl)quinoxalin-2(1*H*)-one (2u) as a yellow solid (35 mg, yield = 60 %); Mp 183-184.6 °C; <sup>1</sup>H NMR (CDCl<sub>3</sub>, 400 MHz) δ 8.16 (d, *J* = 2.4 Hz, 1H), 7.91 (dd, *J* = 8.8, 2.4 Hz, 1H), 7.56-7.54 (m, 2H), 7.40 (d, *J* = 8.8 Hz, 1H), 7.31-7.28 (m, 2H), 3.75 (s, 3H), 2.73 (s, 3H), 2.42 (s, 3H); <sup>13</sup>C NMR (CDCl<sub>3</sub>, 100 MHz) δ 198.09, 152.76, 152.04, 137.89, 137.28, 135.79, 133.32, 132.17, 131.48, 129.81, 128.95, 126.68, 114.20, 29.11, 28.54, 21.10. HRMS (ESI) calcd for C<sub>18</sub> H<sub>16</sub> N<sub>2</sub> O<sub>2</sub> Na [M + Na]<sup>+</sup>: 315.1109; found: 315.1111.

**(5) References:**

1. M. I. Shahin, D. A. Abou El Ella, N. S. M. Ismail, K. A. M. Abouzid. *Bioorg. Chem.* 2014, **56**, 16-26.
2. X. Zeng, C. Liu, X. Wang, J. Zhang, X. Wang, Y. Hu. *Organic & Biomolecular Chemistry.* 2017, **15**, 8929-8935.

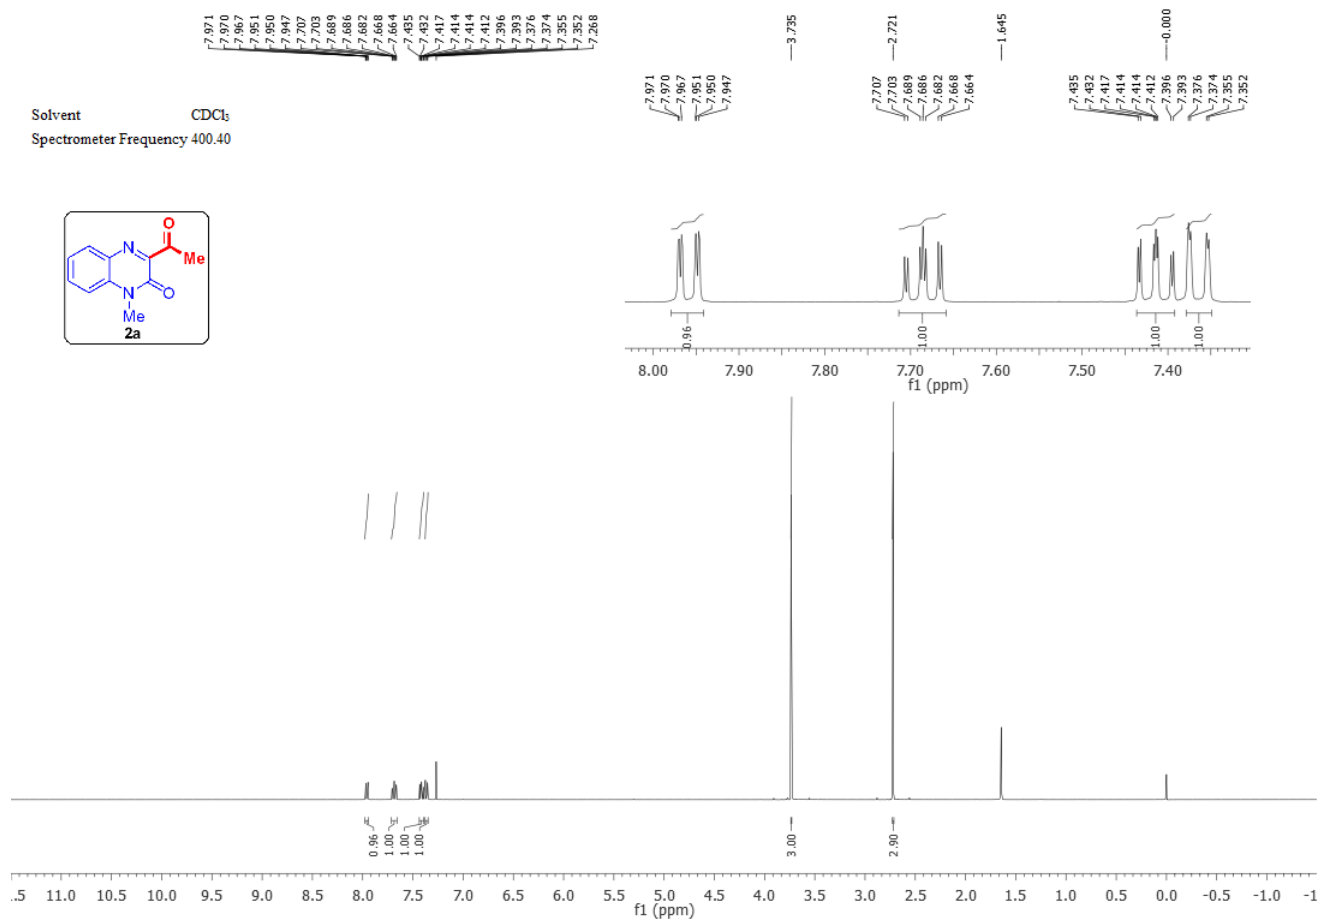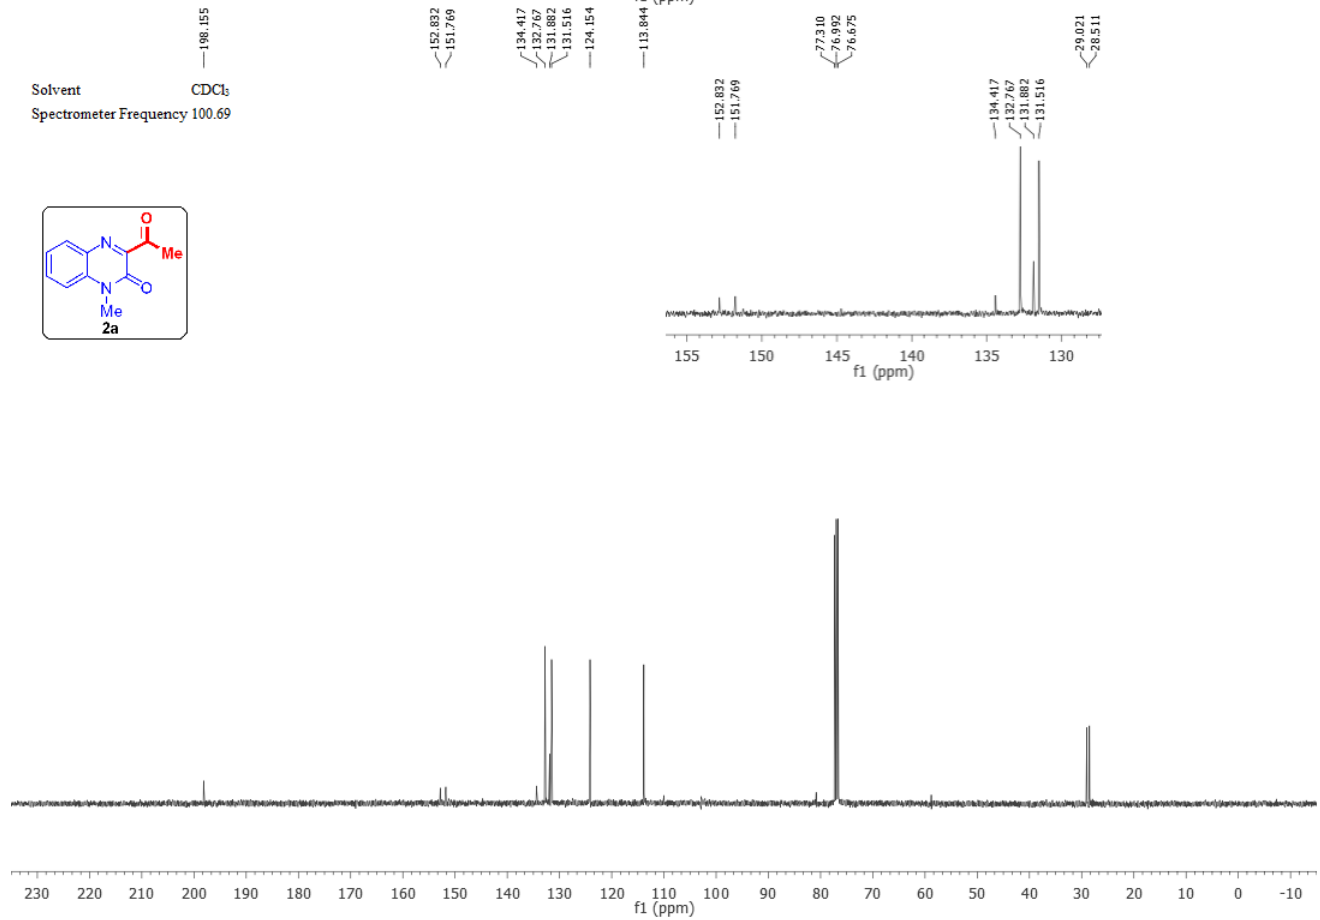



Solvent  $\text{CDCl}_3$   
Spectrometer Frequency 400.40

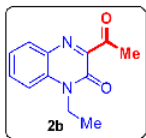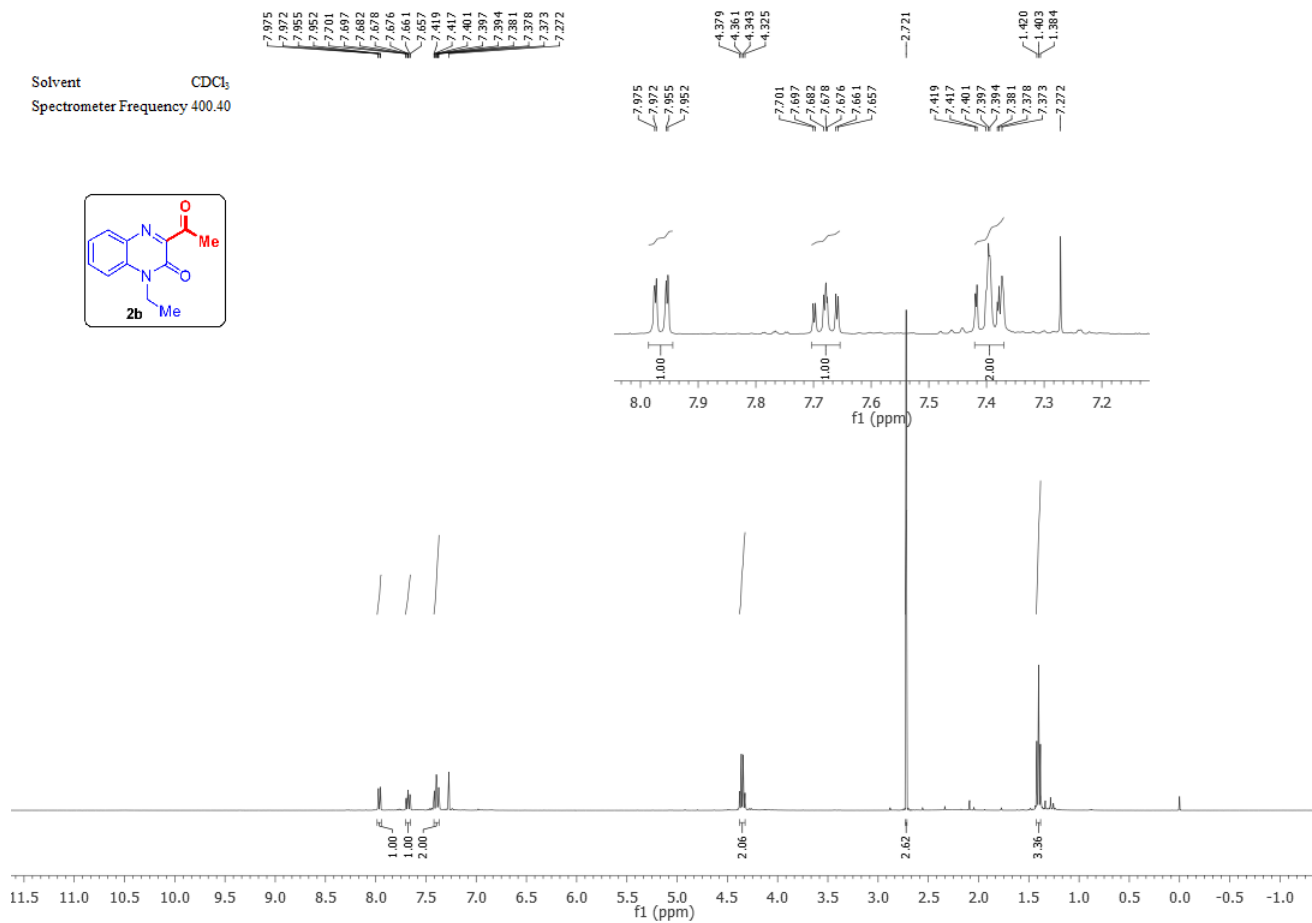

Solvent  $\text{CDCl}_3$   
Spectrometer Frequency 100.69

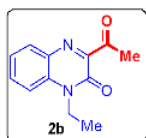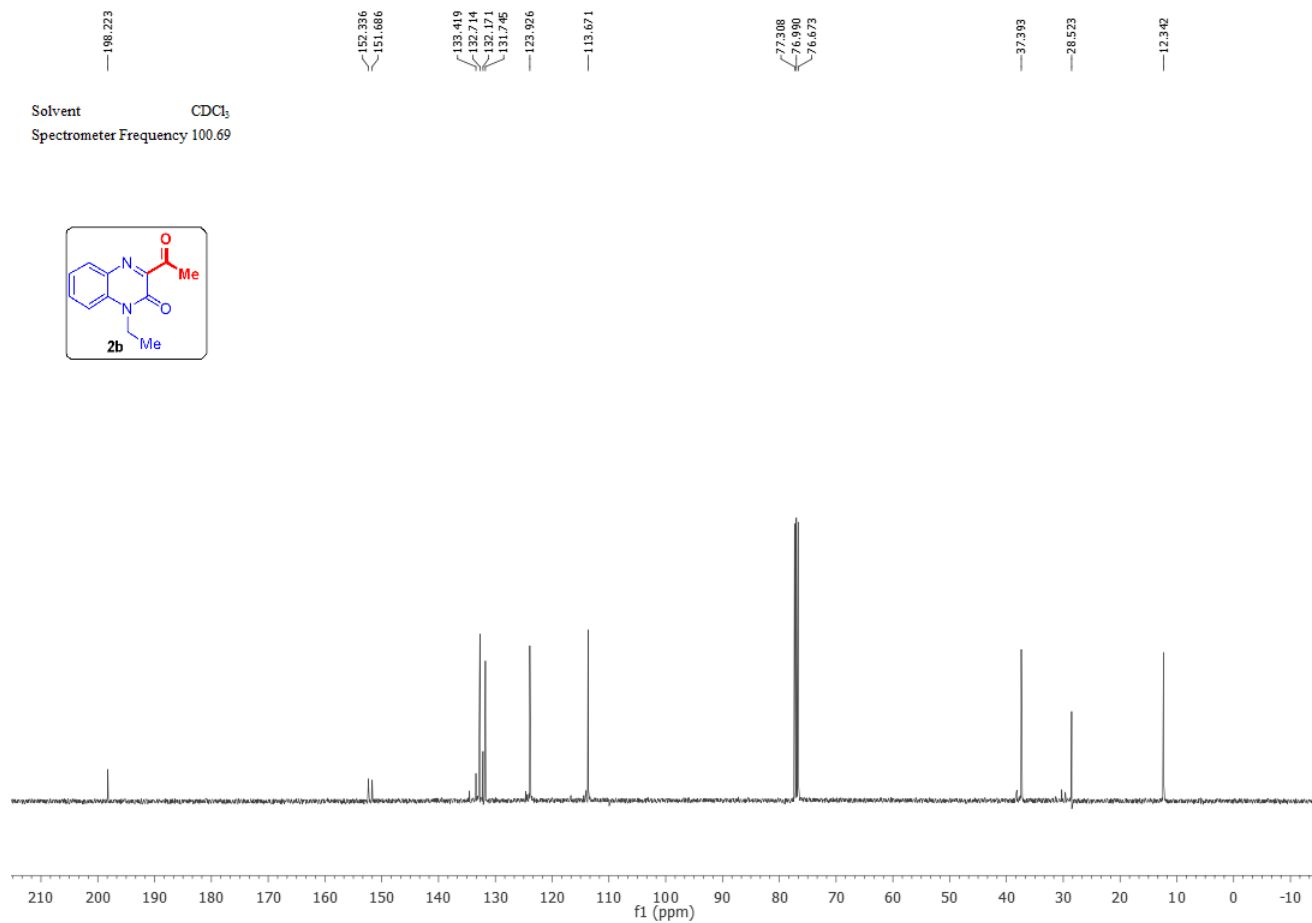

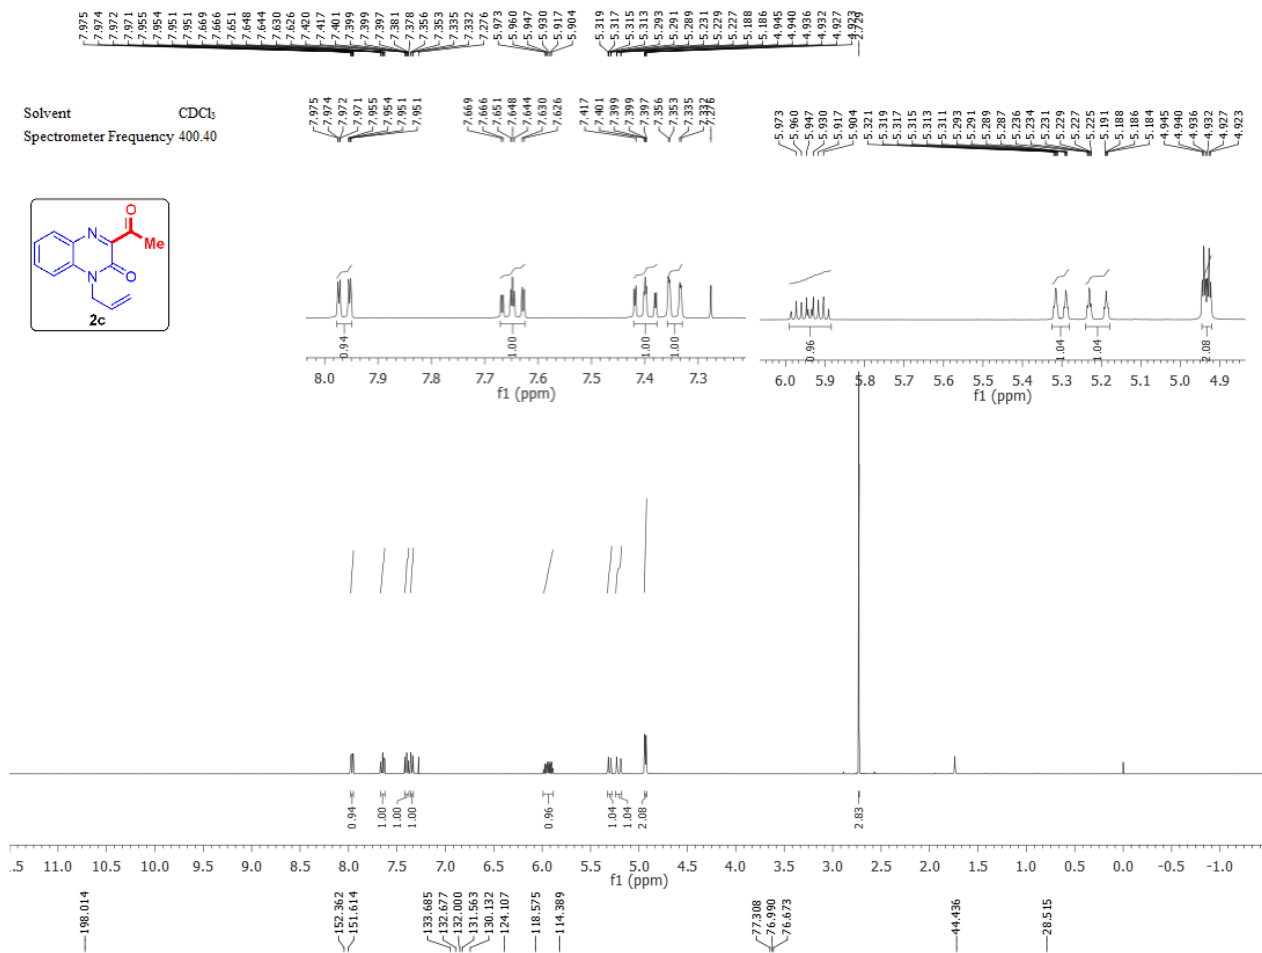

Solvent  $\text{CDCl}_3$   
Spectrometer Frequency 100.69

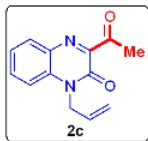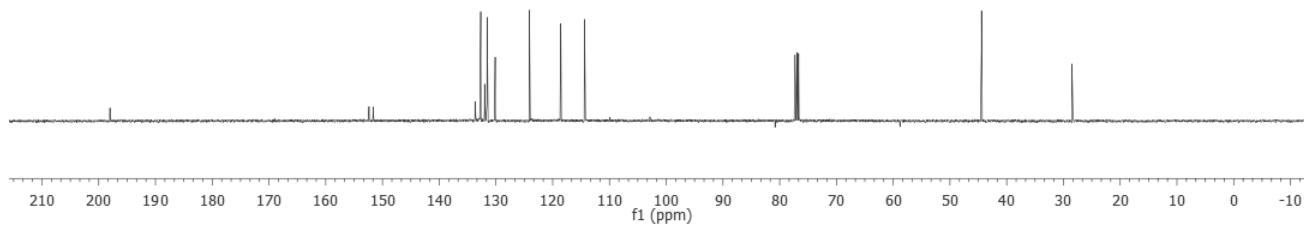

Solvent  $CDCl_3$   
Spectrometer Frequency 400.40

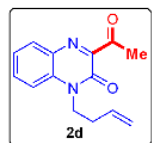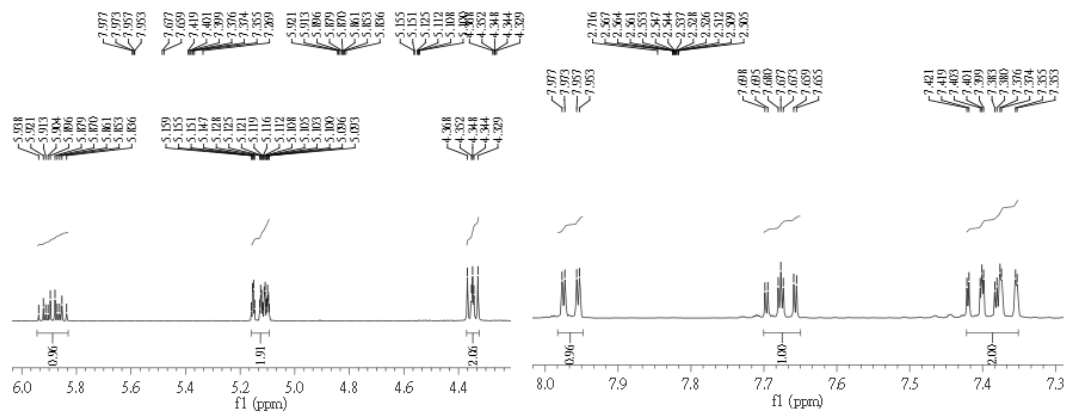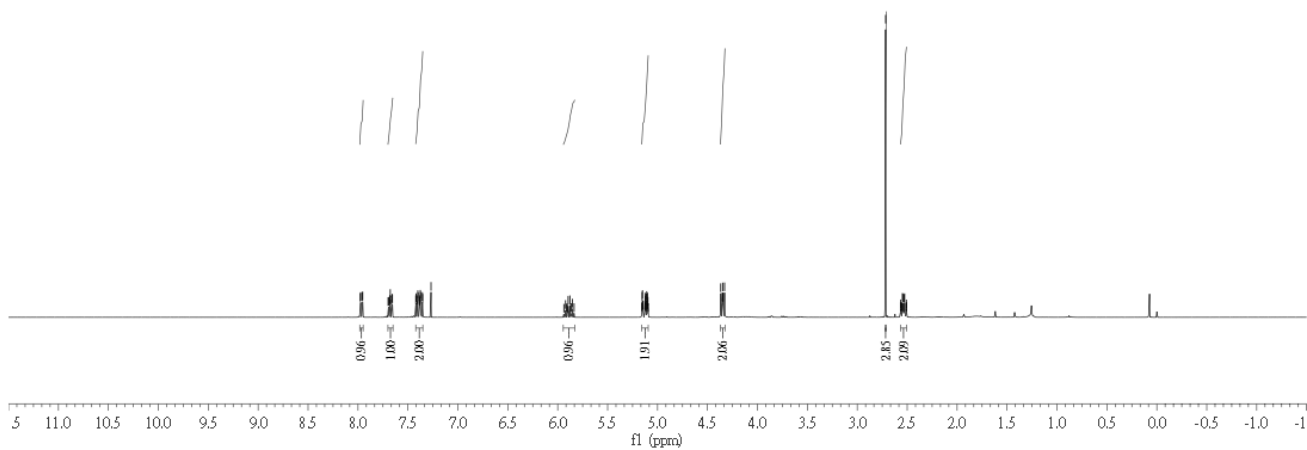

Solvent  $CDCl_3$   
Spectrometer Frequency 100.69

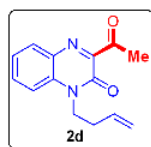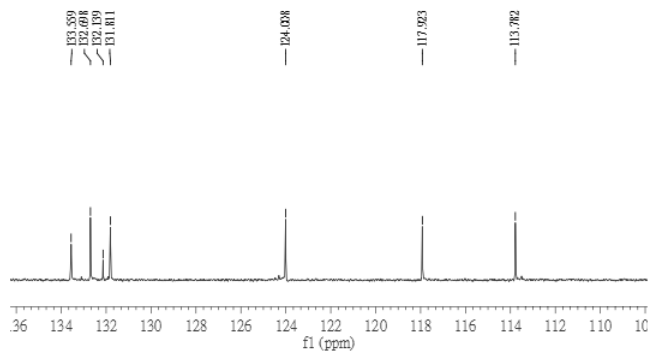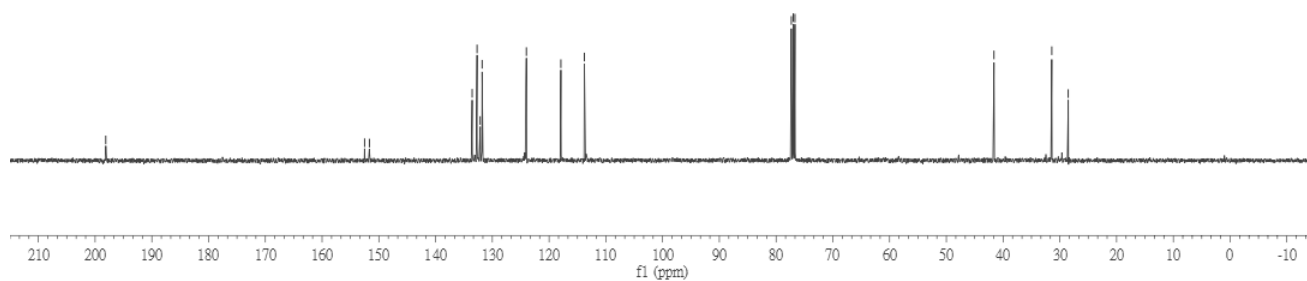

Solvent  $\text{CDCl}_3$   
Spectrometer Frequency 400.40

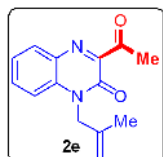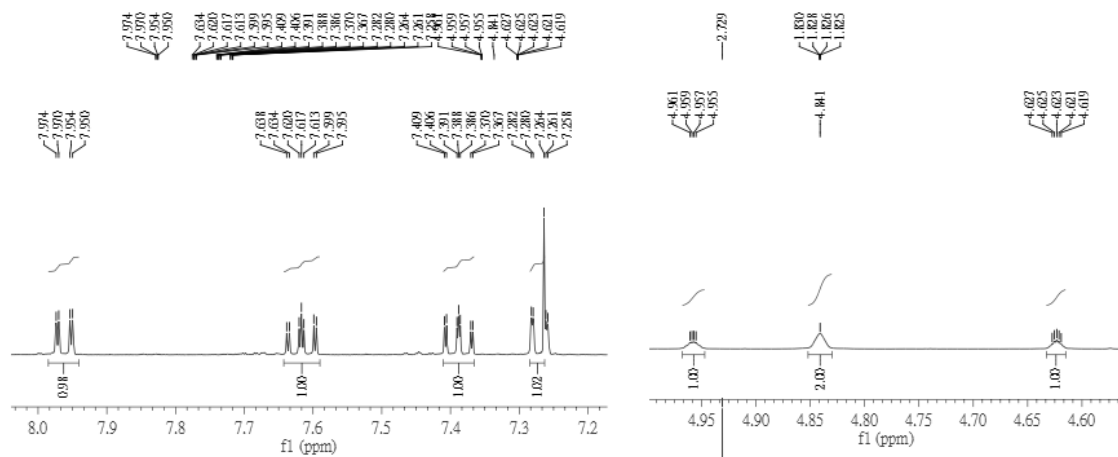

Solvent  $\text{CDCl}_3$   
Spectrometer Frequency 100.69

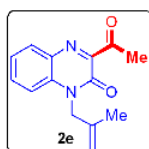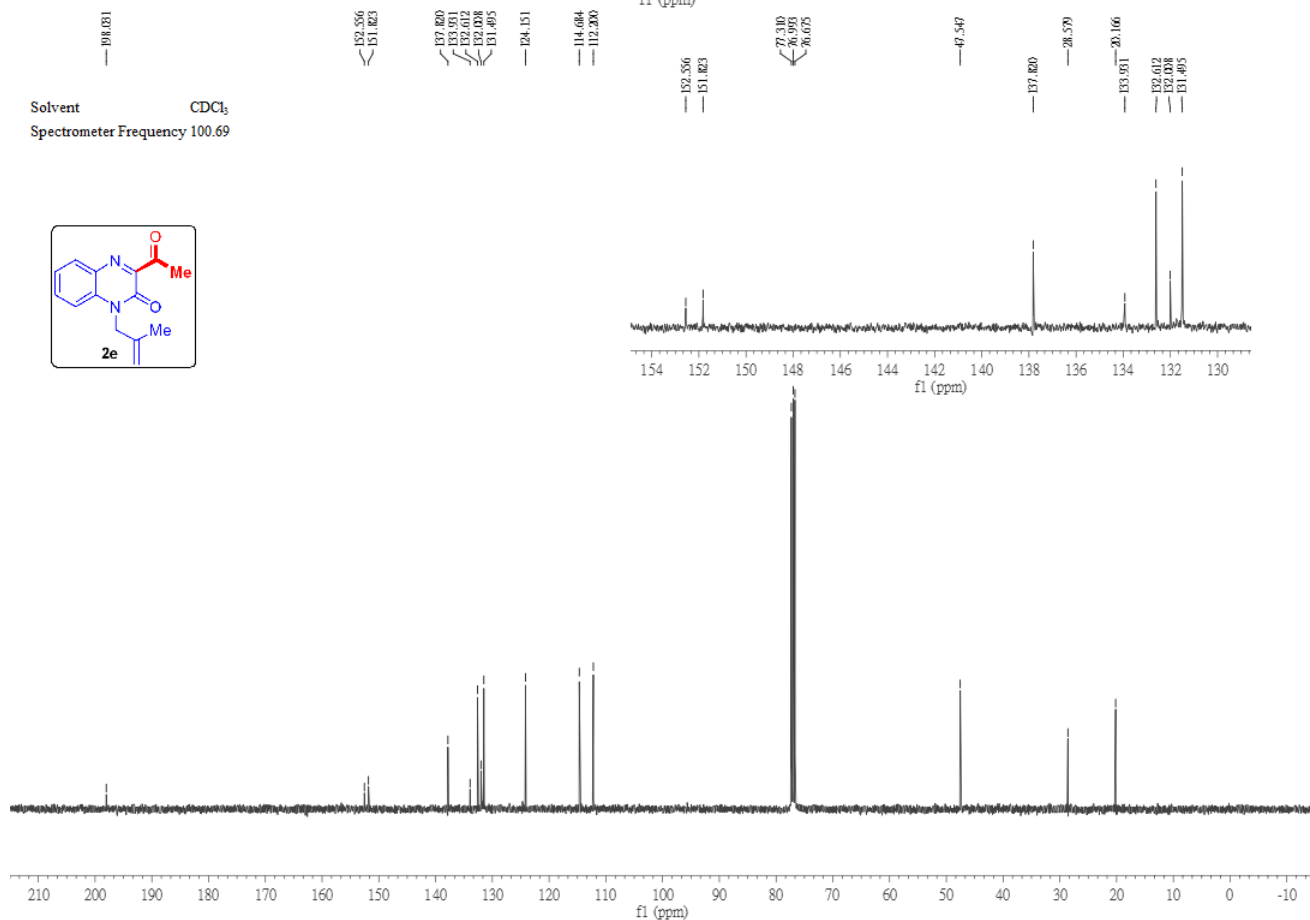

Solvent CDCl<sub>3</sub>  
Spectrometer Frequency 400.40

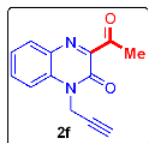

7.987  
7.983  
7.967  
7.963  
7.941  
7.931  
7.719  
7.716  
7.701  
7.698  
7.530  
7.508  
7.463  
7.461  
7.443  
7.425  
7.423  
7.268

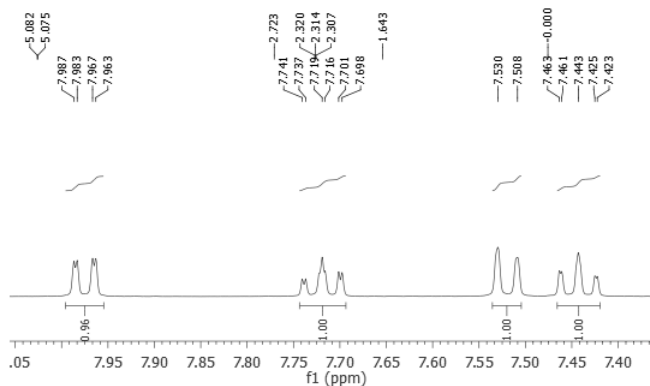

Solvent CDCl<sub>3</sub>  
Spectrometer Frequency 100.69

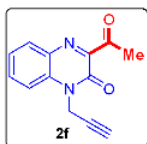

197.645  
151.52  
151.417  
132.947  
132.907  
132.045  
131.656  
124.522  
114.394

77.309  
76.992  
76.674  
76.272  
73.561

31.329  
28.462

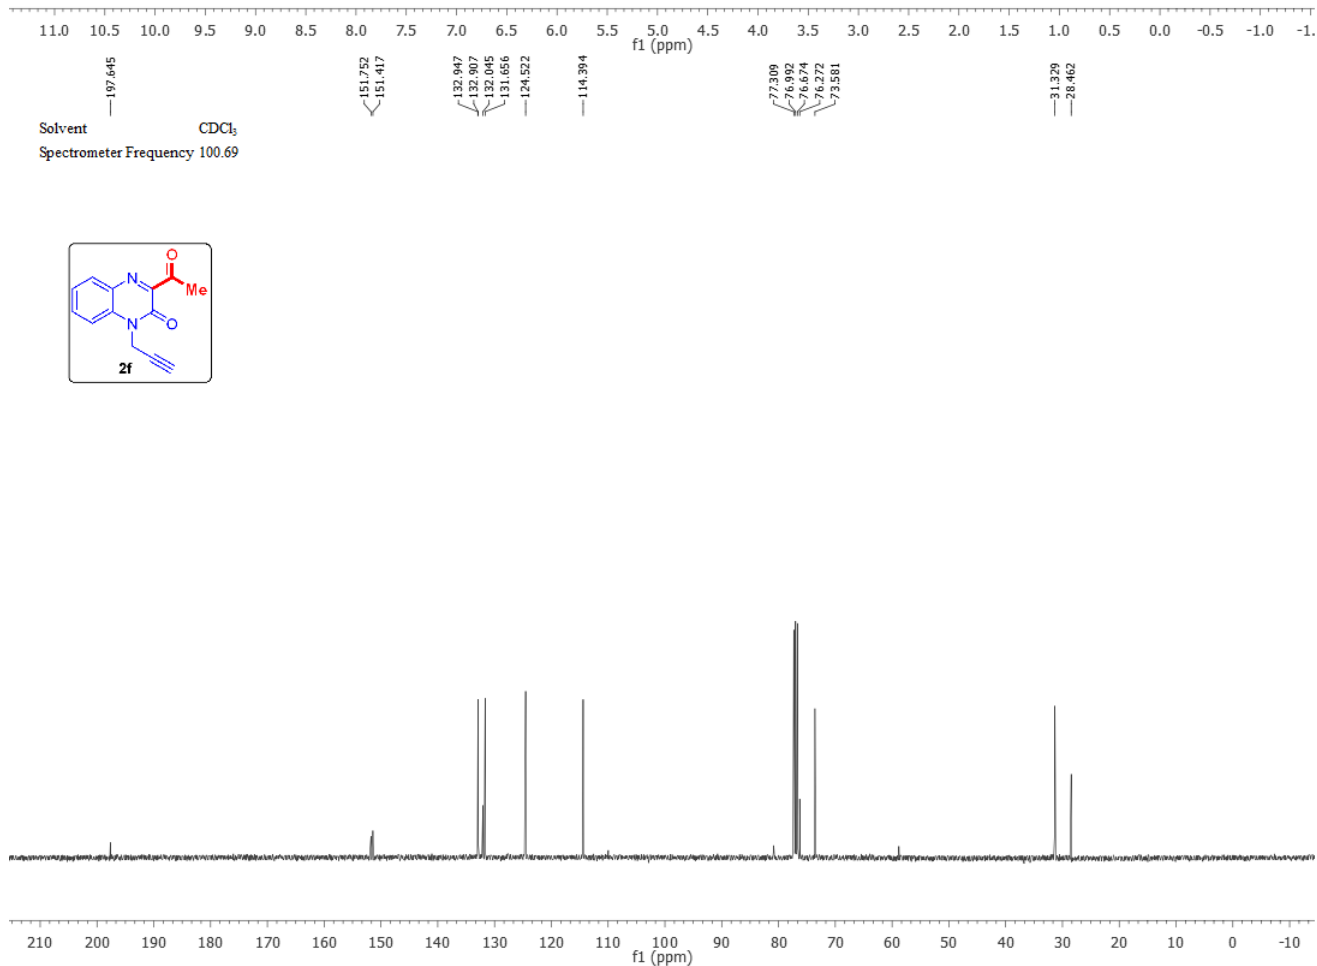

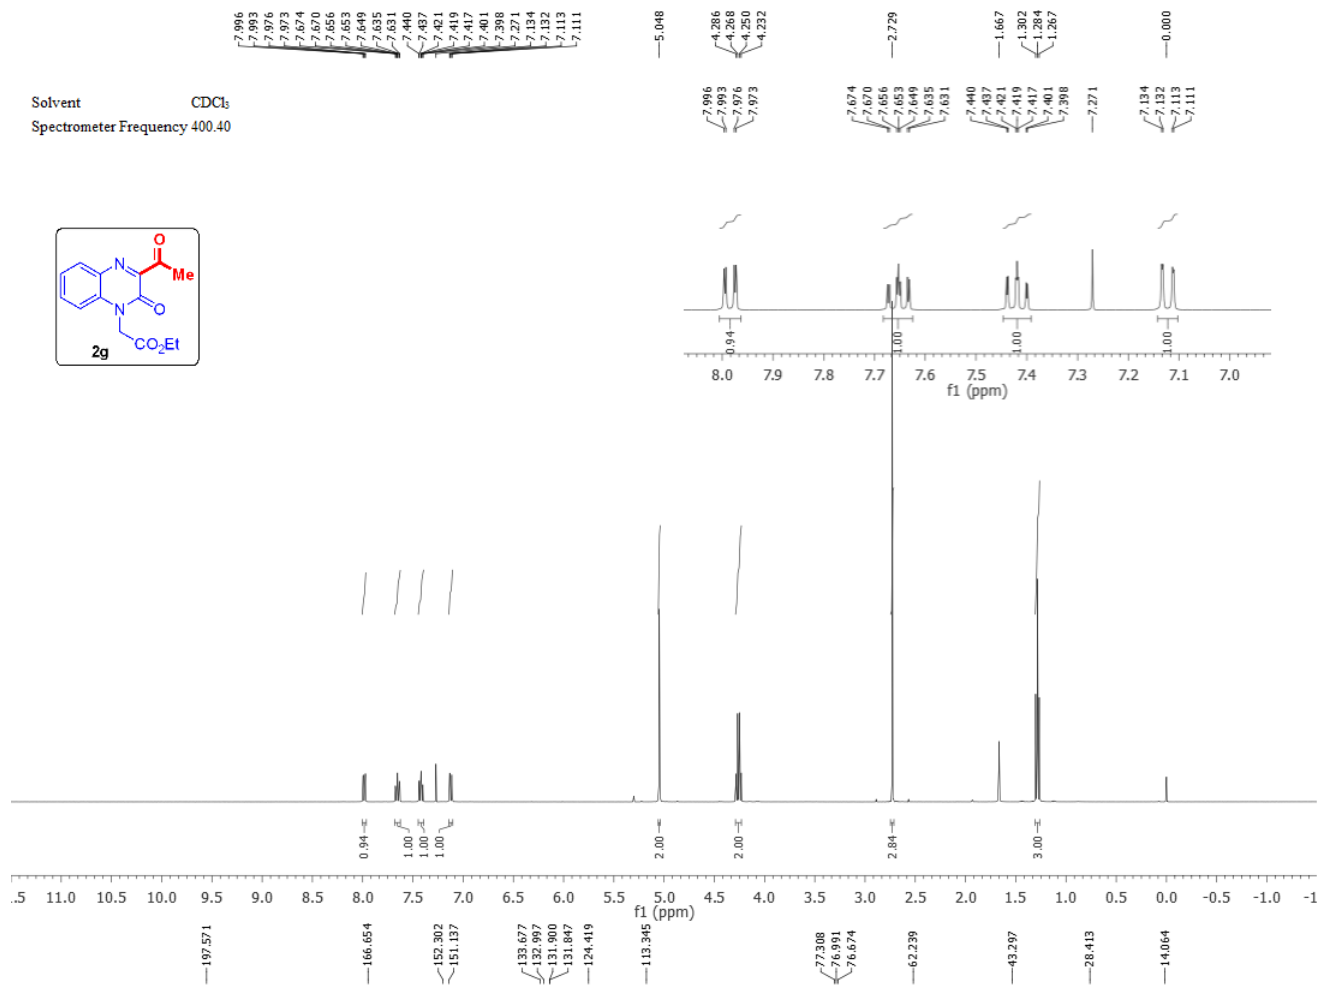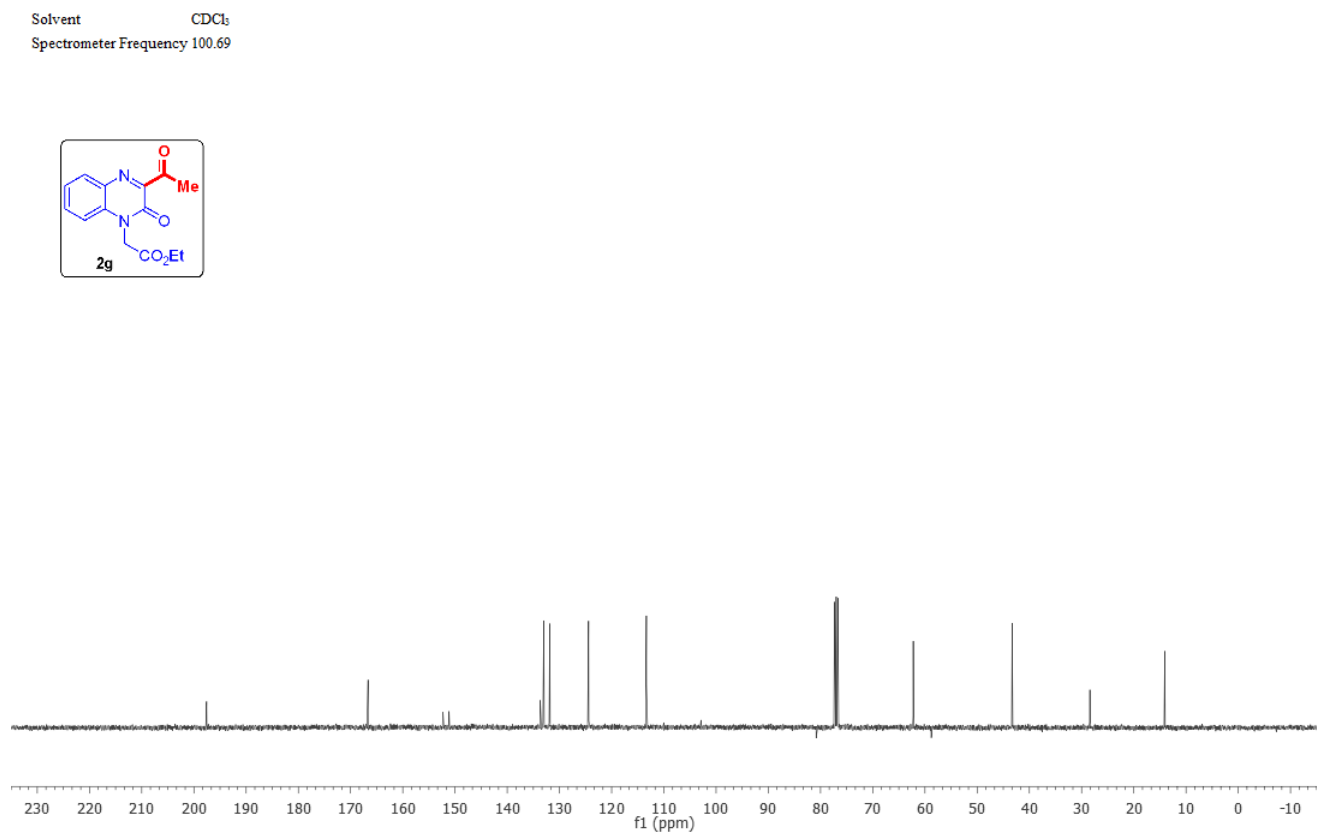

Solvent  $\text{CDCl}_3$   
Spectrometer Frequency 400.40

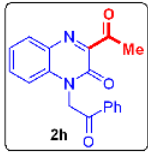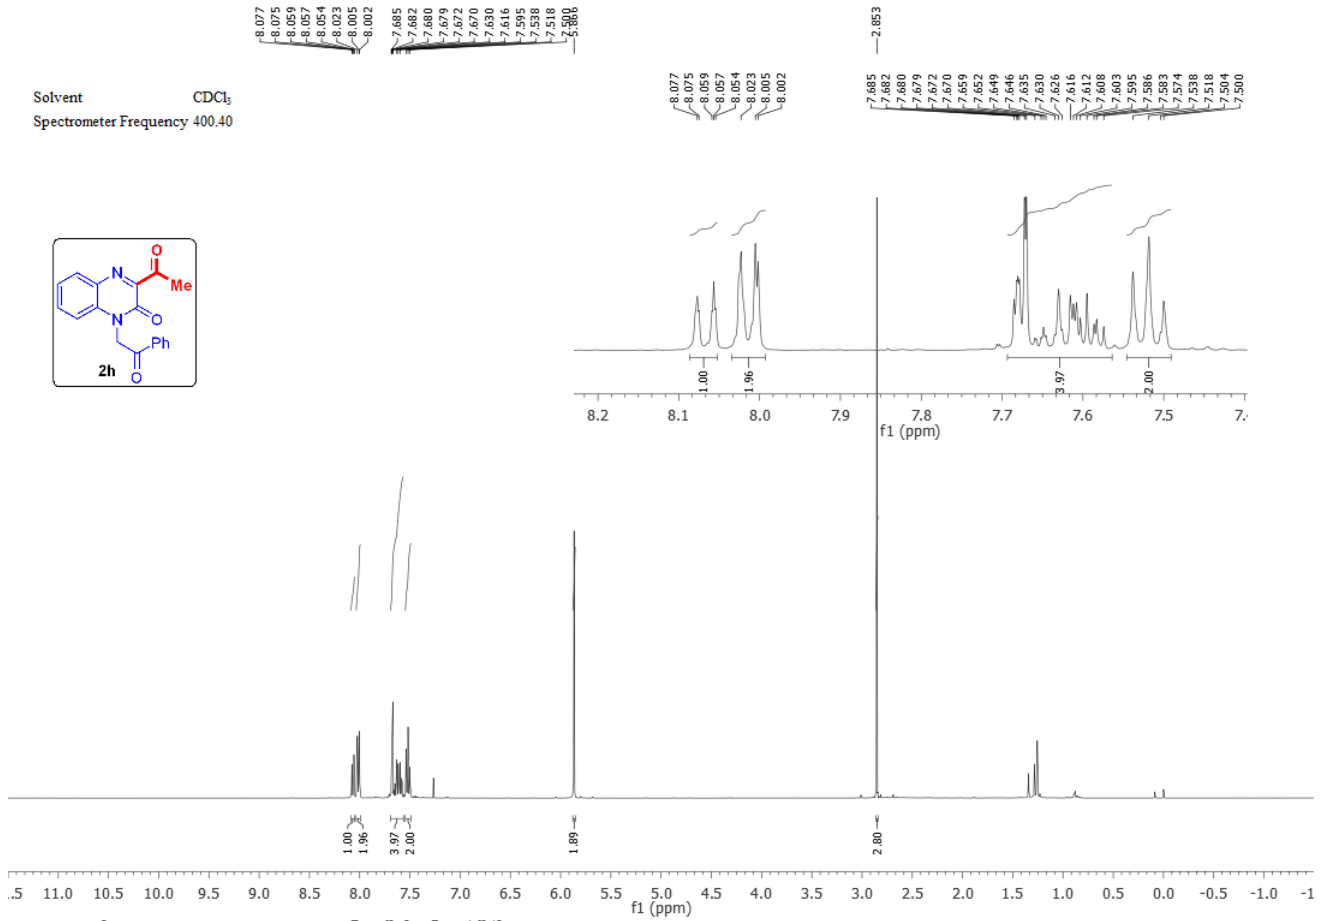

Solvent  $\text{CDCl}_3$   
Spectrometer Frequency 100.69

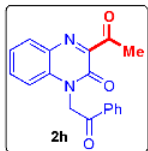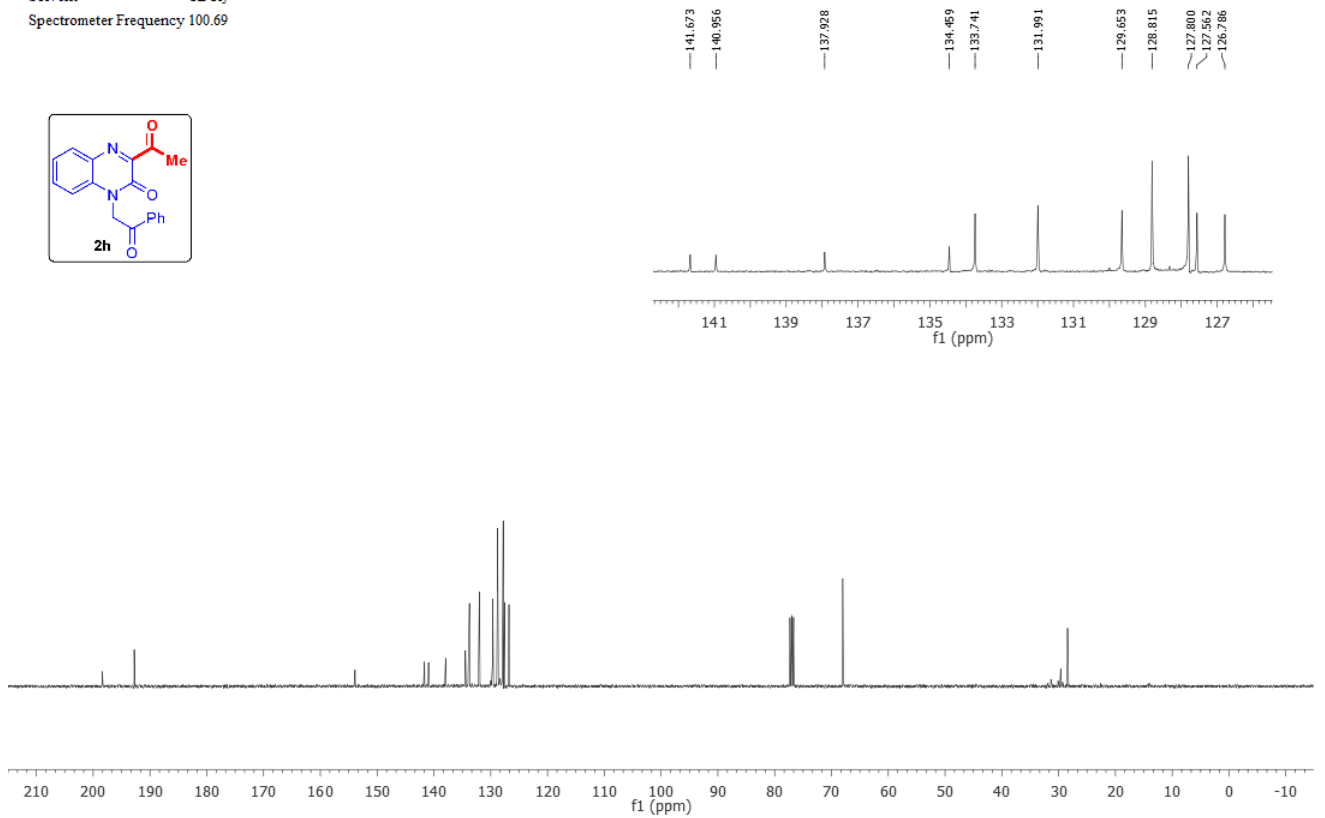

Solvent  $\text{CDCl}_3$   
Spectrometer Frequency 400.40

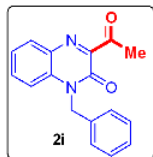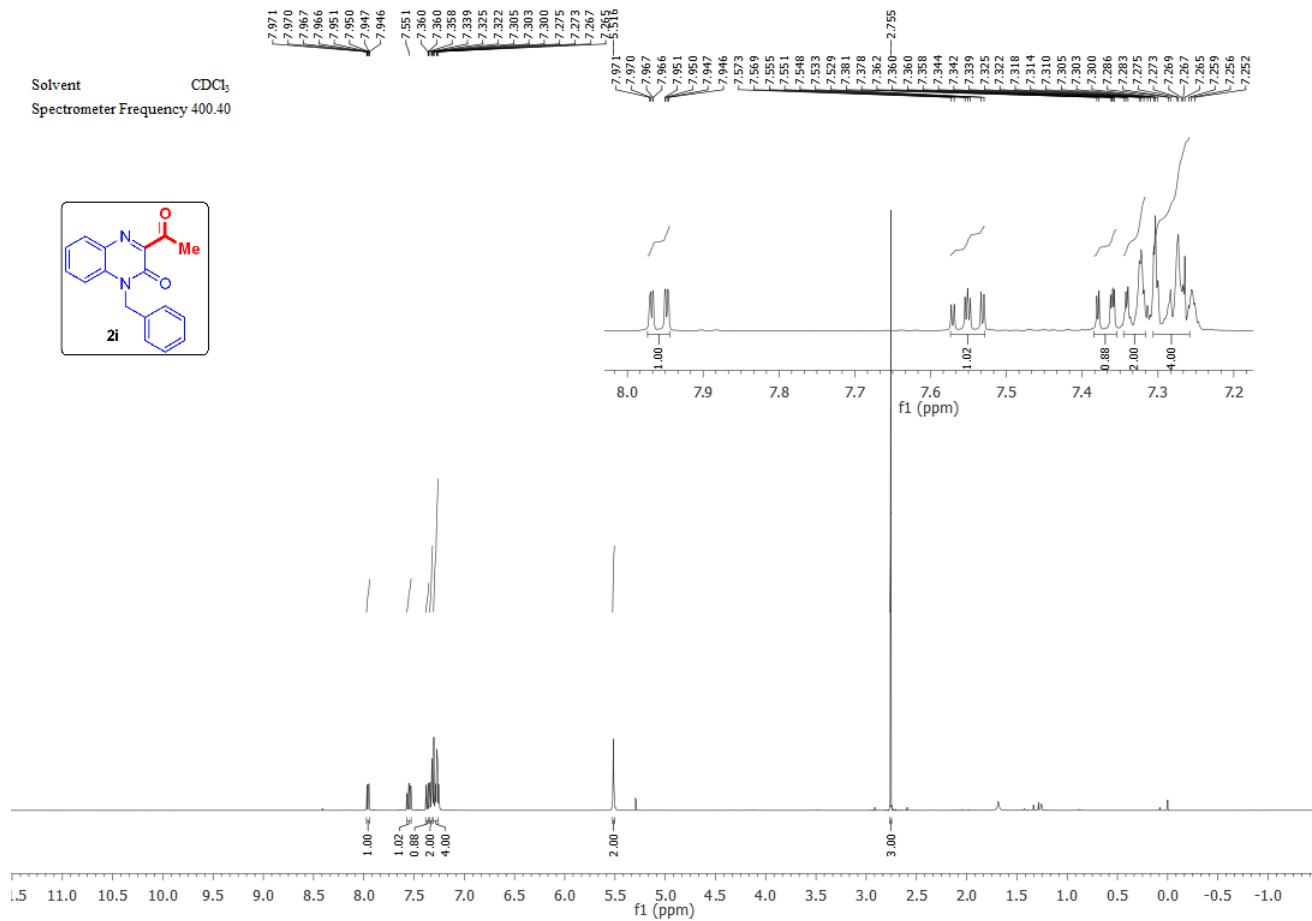

Solvent  $\text{CDCl}_3$   
Spectrometer Frequency 100.69

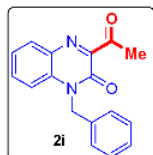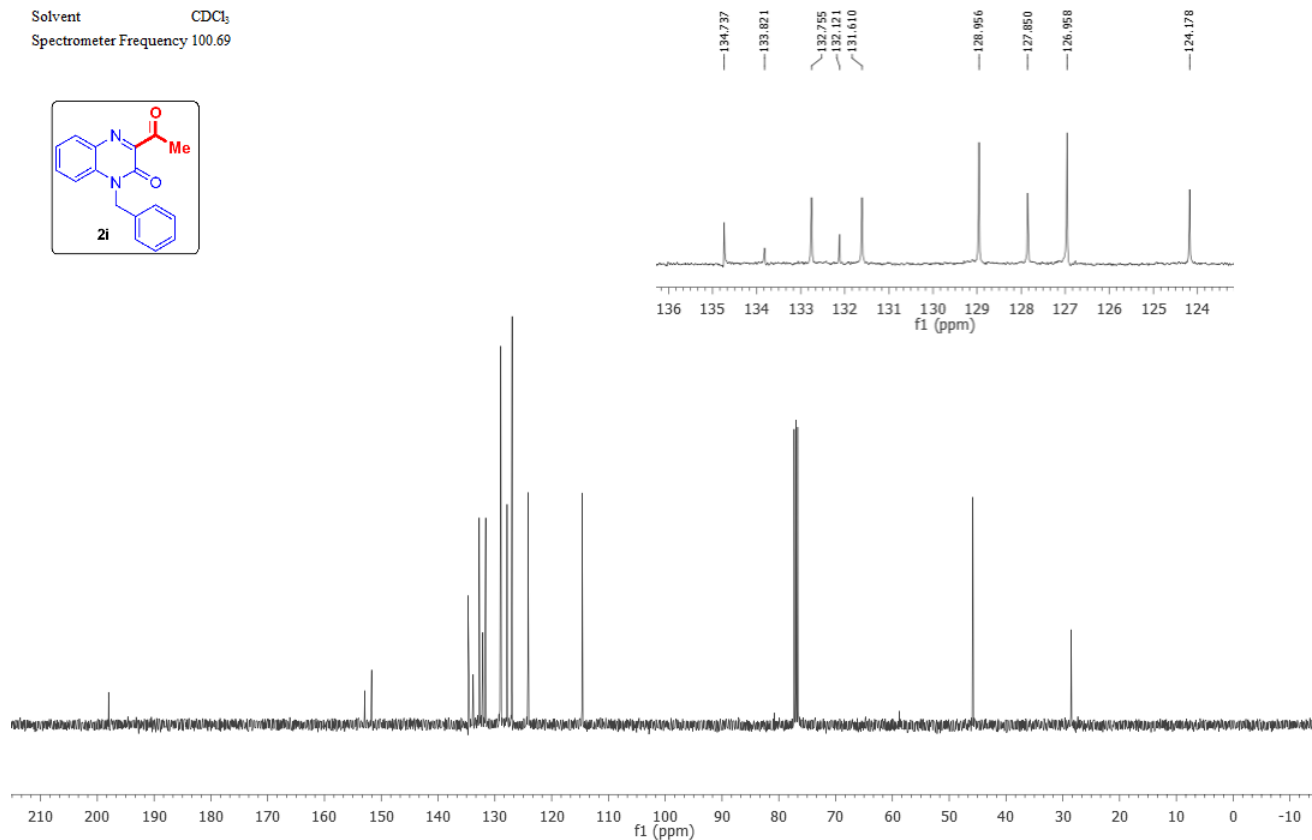



Solvent  $\text{CDCl}_3$   
Spectrometer Frequency 400.40

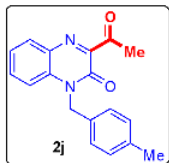

7.961  
7.960  
7.957  
7.941  
7.940  
7.937  
7.549  
7.531  
7.370  
7.354  
7.351  
7.346  
7.324  
7.322  
7.283  
7.180  
7.159  
7.130  
5.493

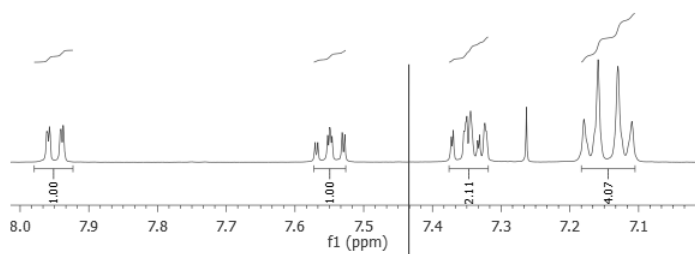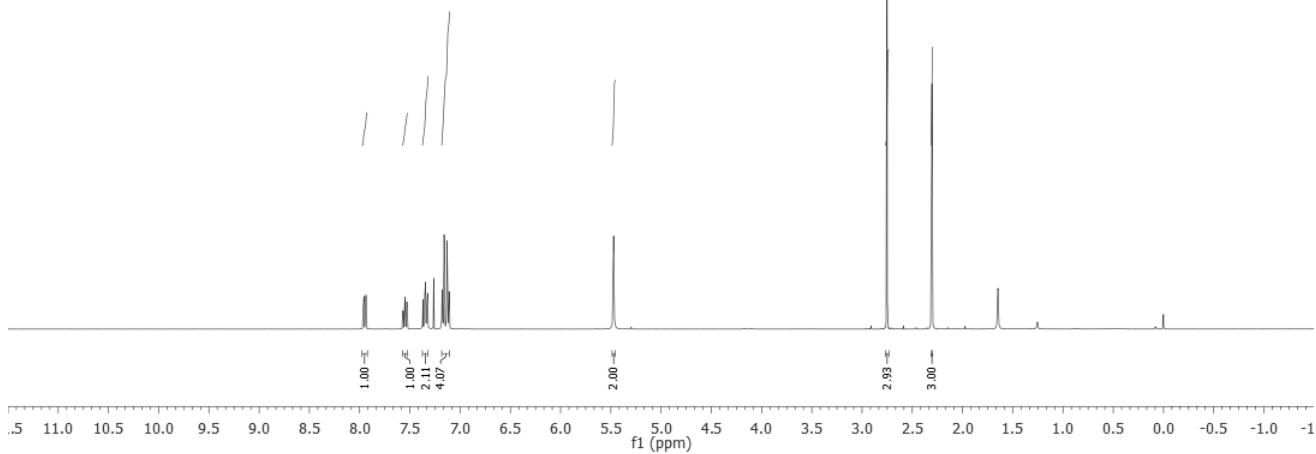

Solvent  $\text{CDCl}_3$   
Spectrometer Frequency 100.69

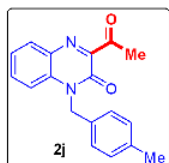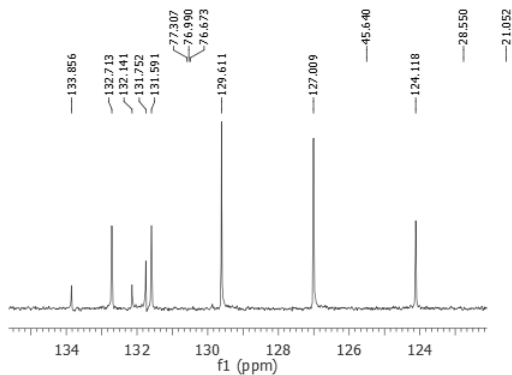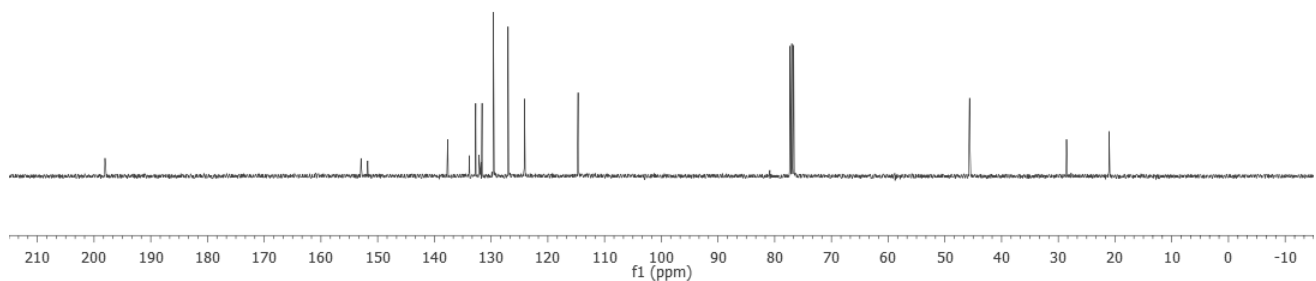

Solvent CDCl<sub>3</sub>  
Spectrometer Frequency 400.40

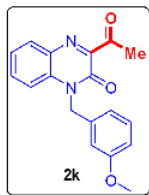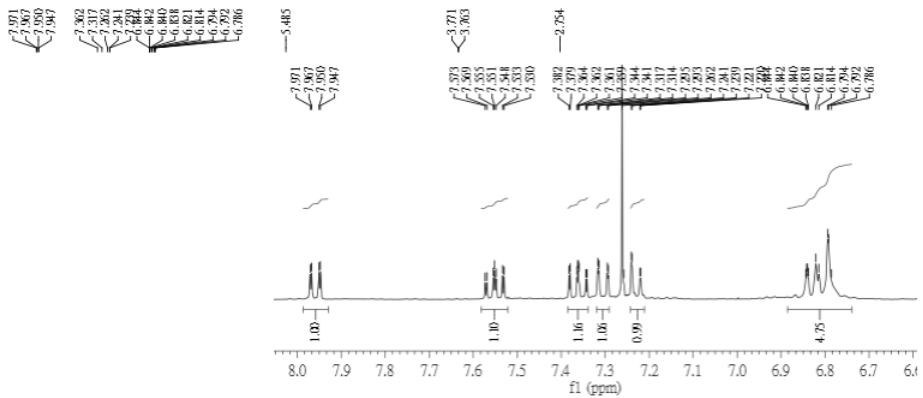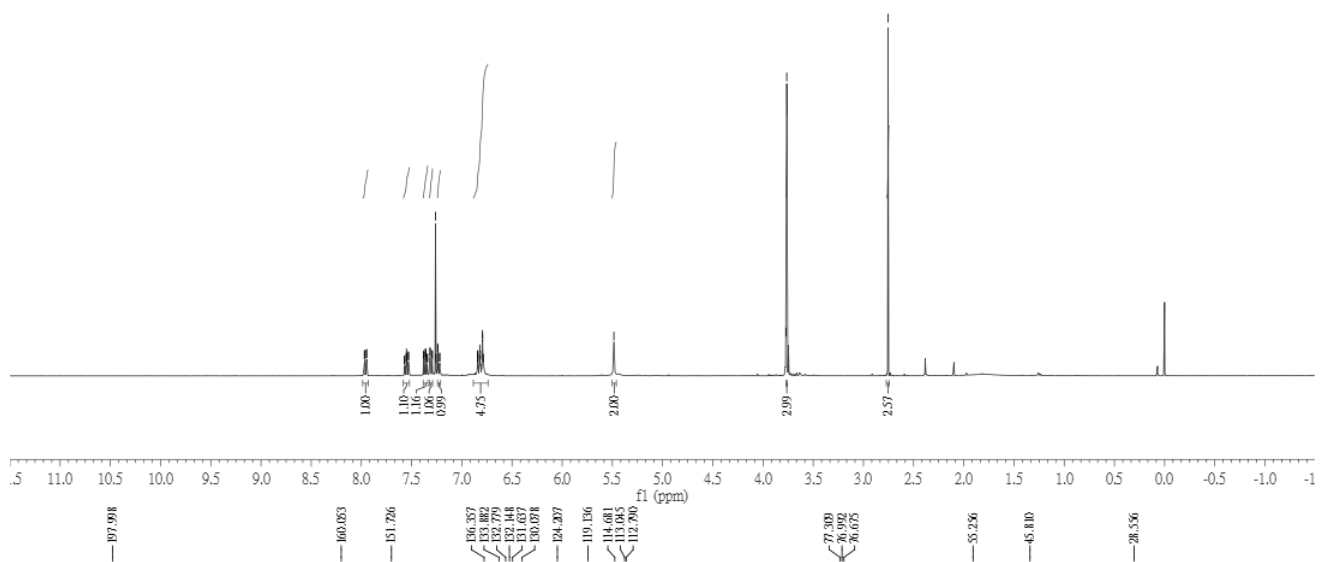

Solvent CDCl<sub>3</sub>  
Spectrometer Frequency 100.69

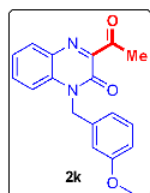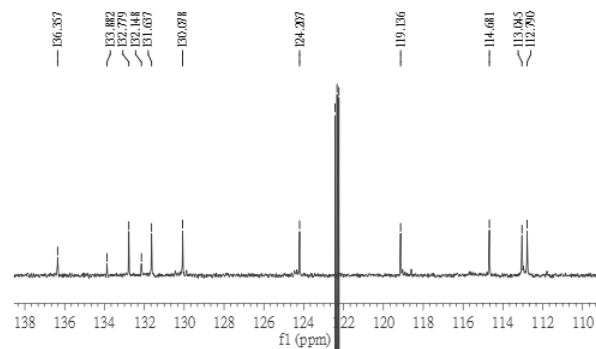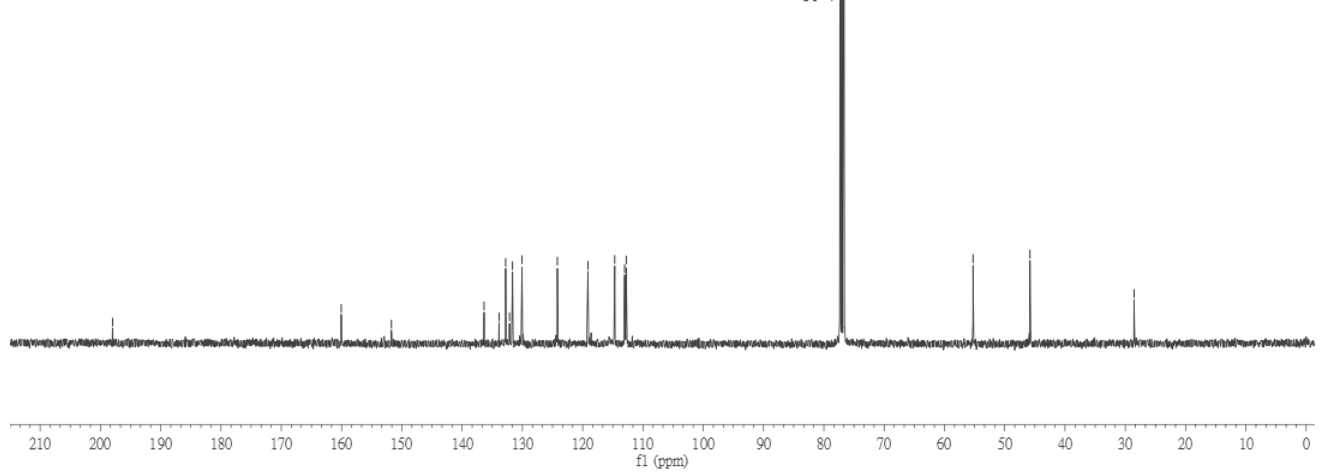

Solvent  $\text{CDCl}_3$   
Spectrometer Frequency 400.40

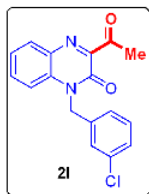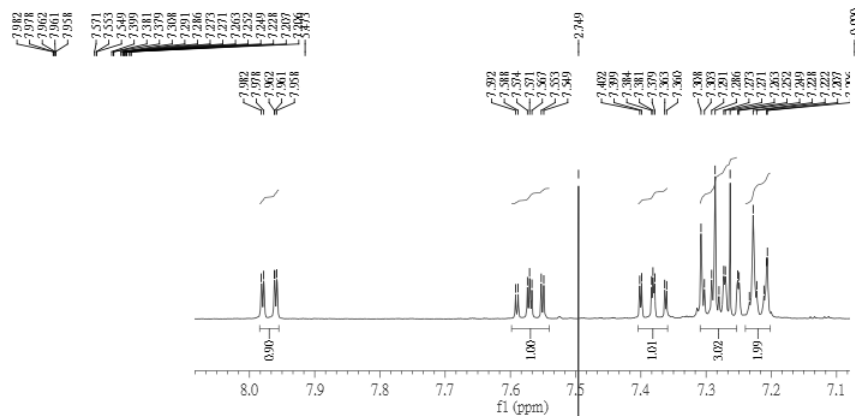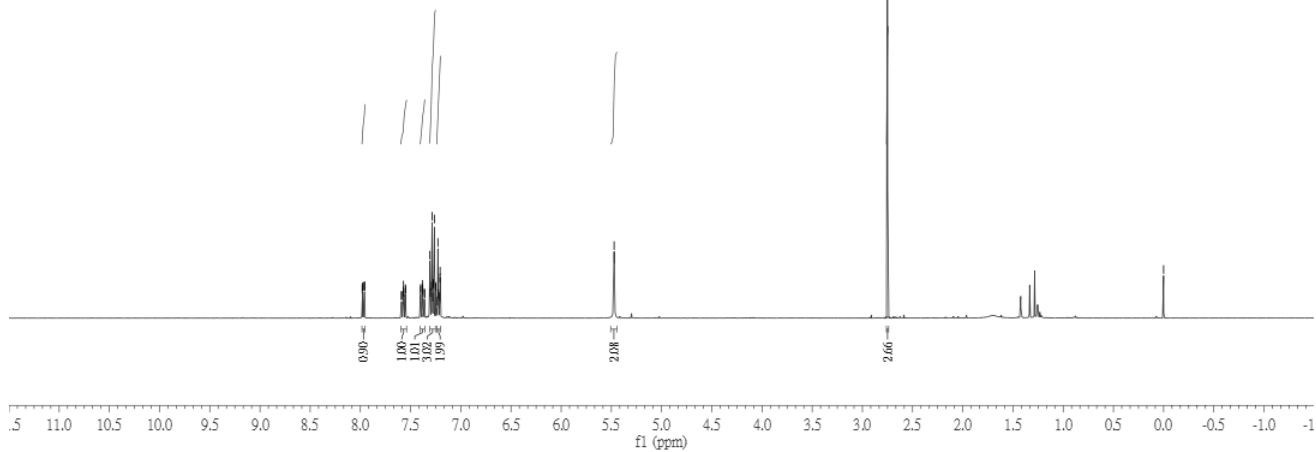

Solvent  $\text{CDCl}_3$   
Spectrometer Frequency 100.69

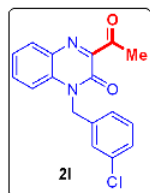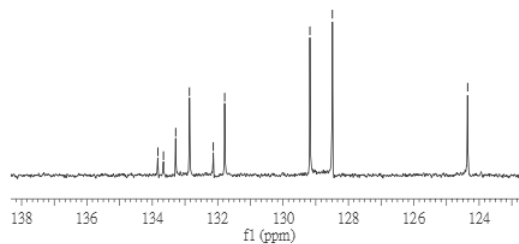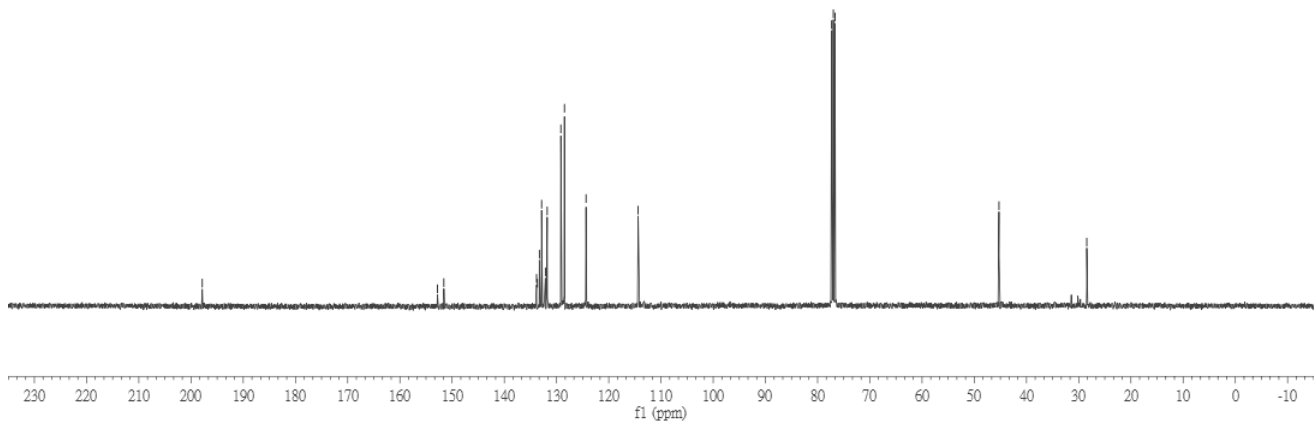

Solvent  $\text{CDCl}_3$   
Spectrometer Frequency 400.40

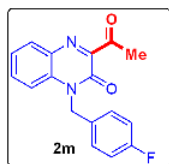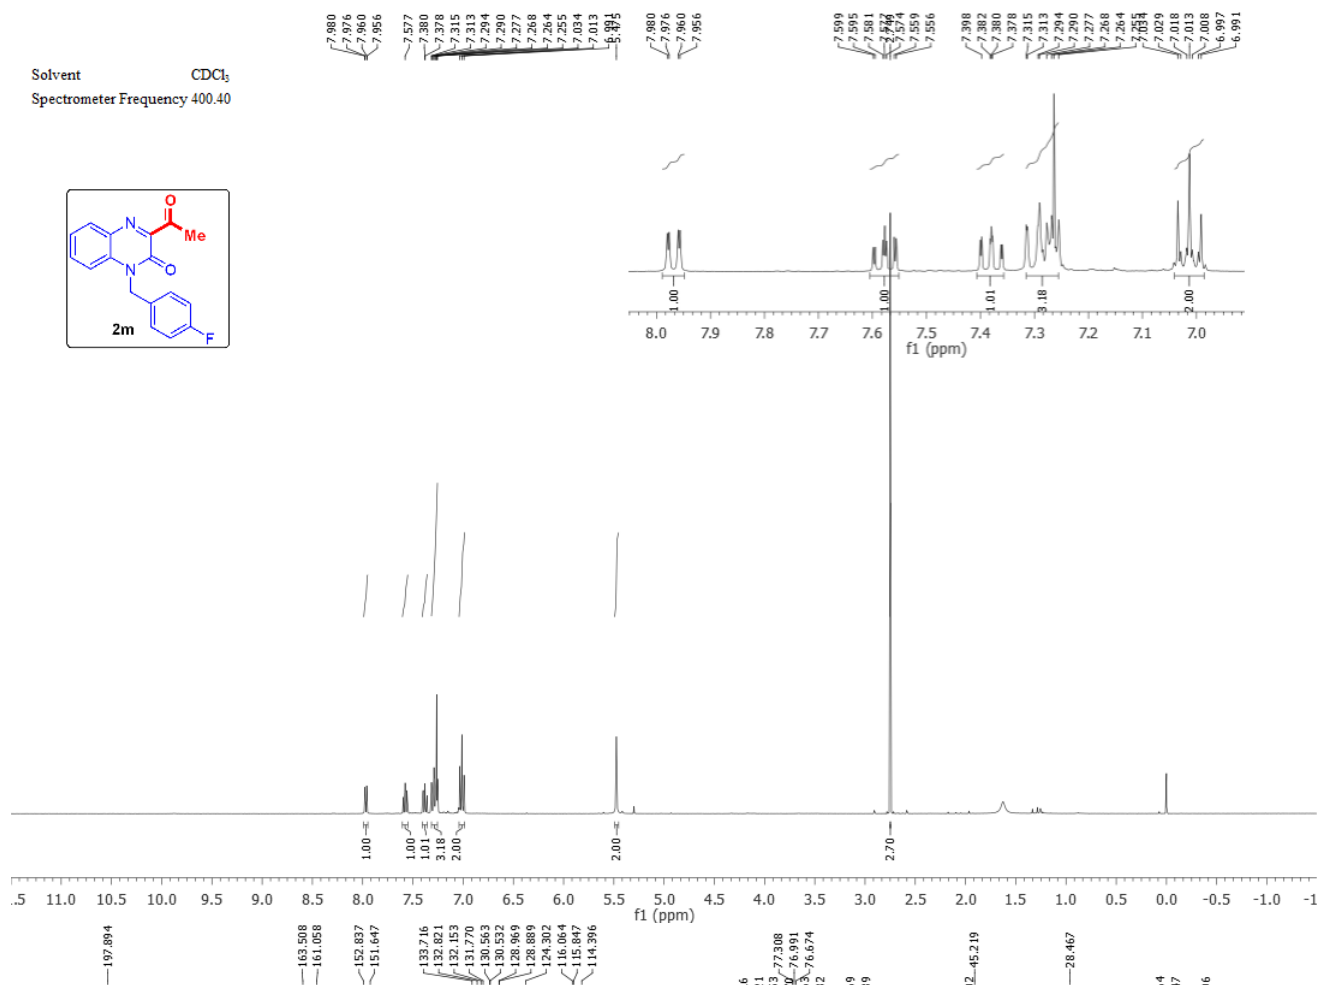

Solvent  $\text{CDCl}_3$   
Spectrometer Frequency 100.69

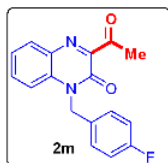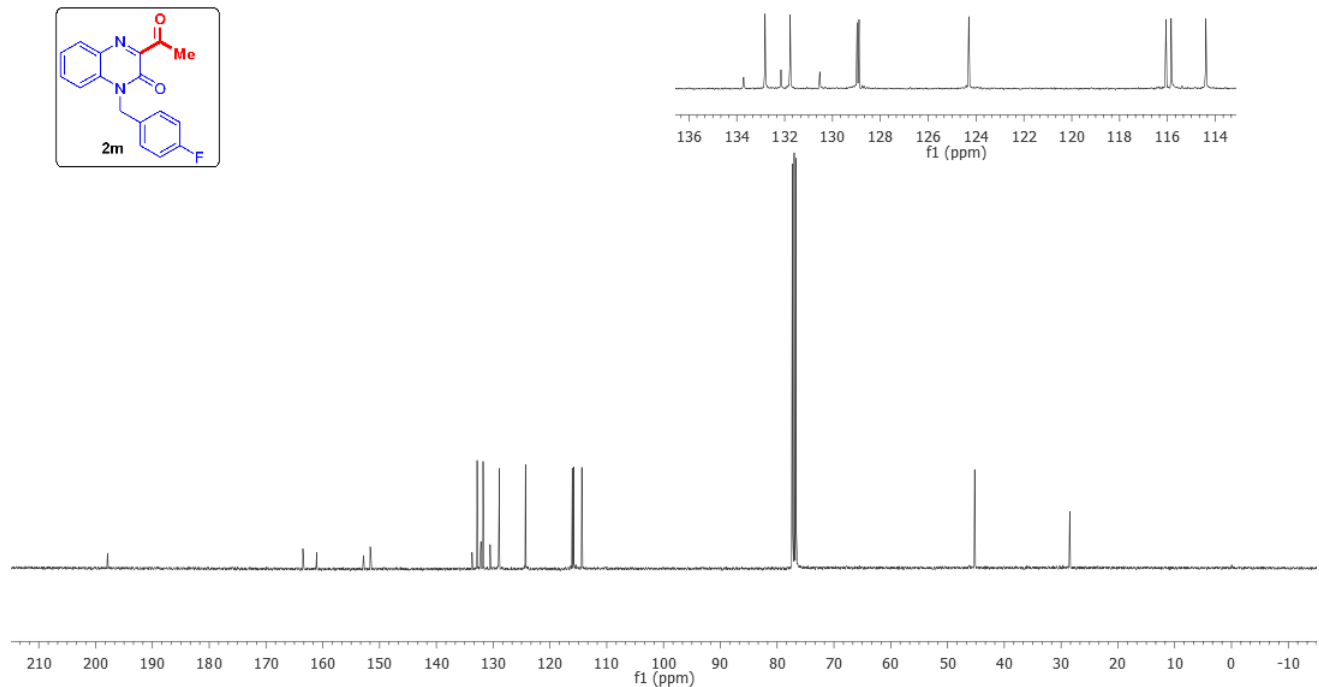

Solvent CDCl<sub>3</sub>  
Spectrometer Frequency 400.40

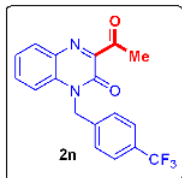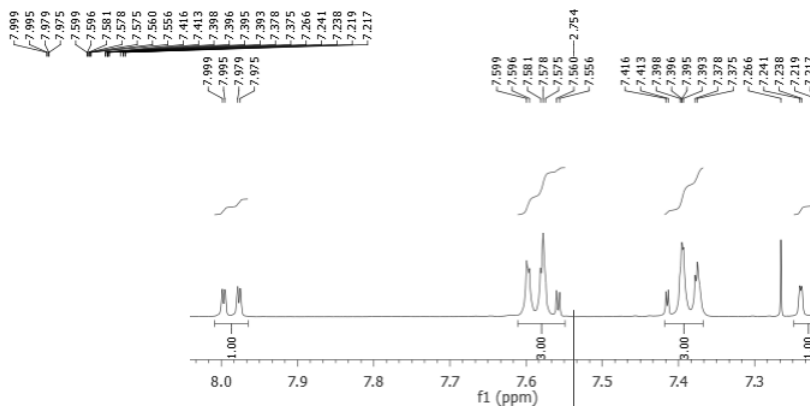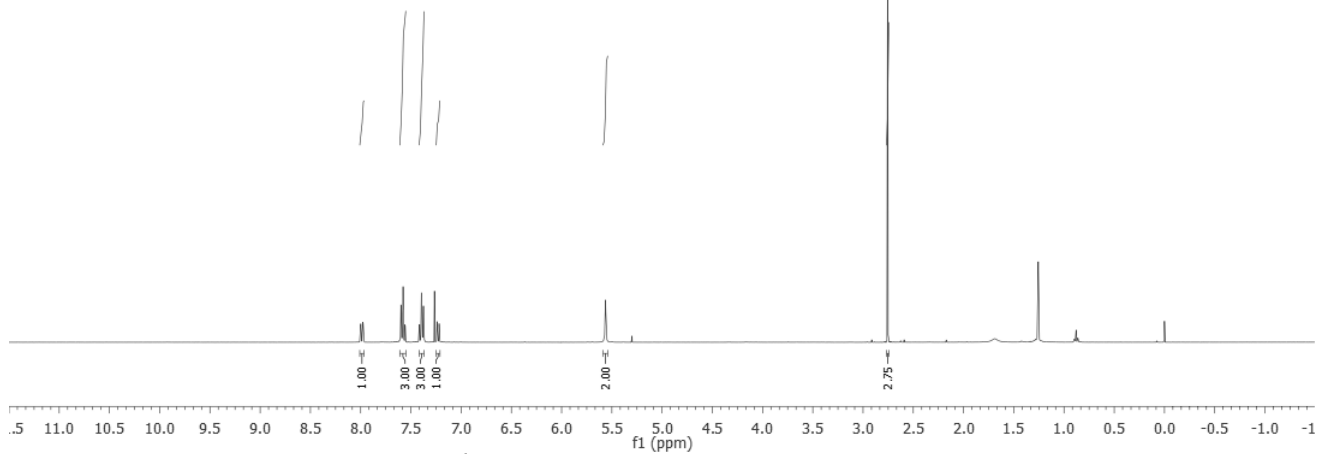

Solvent CDCl<sub>3</sub>  
Spectrometer Frequency 100.69

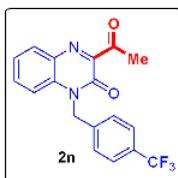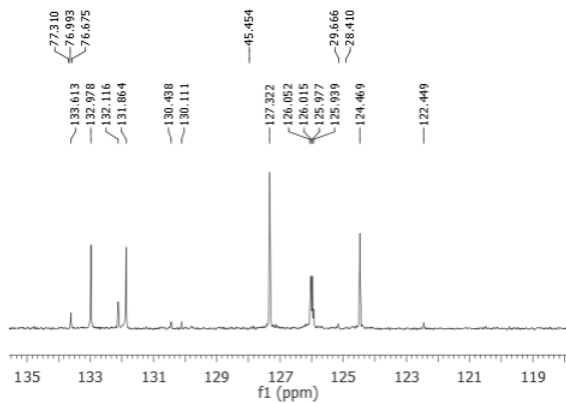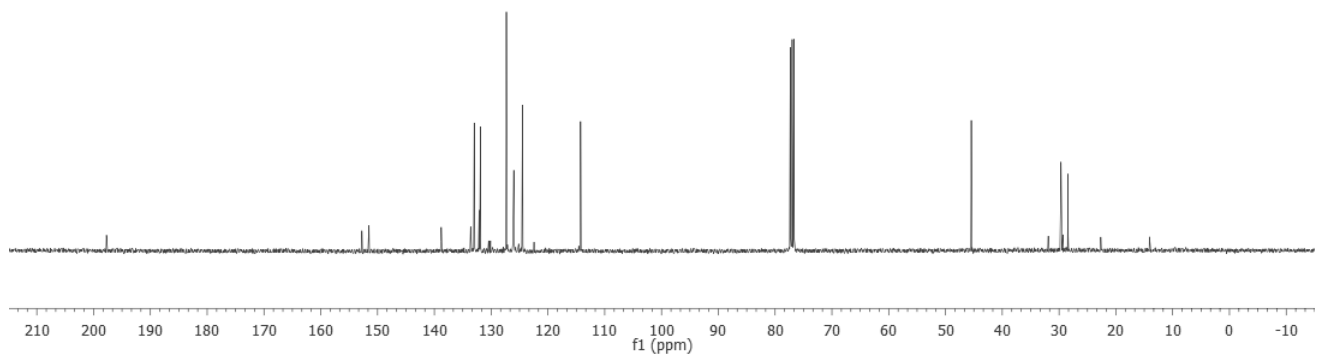

Solvent CDCl<sub>3</sub>  
Spectrometer Frequency 400.40

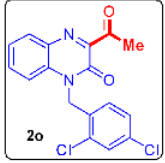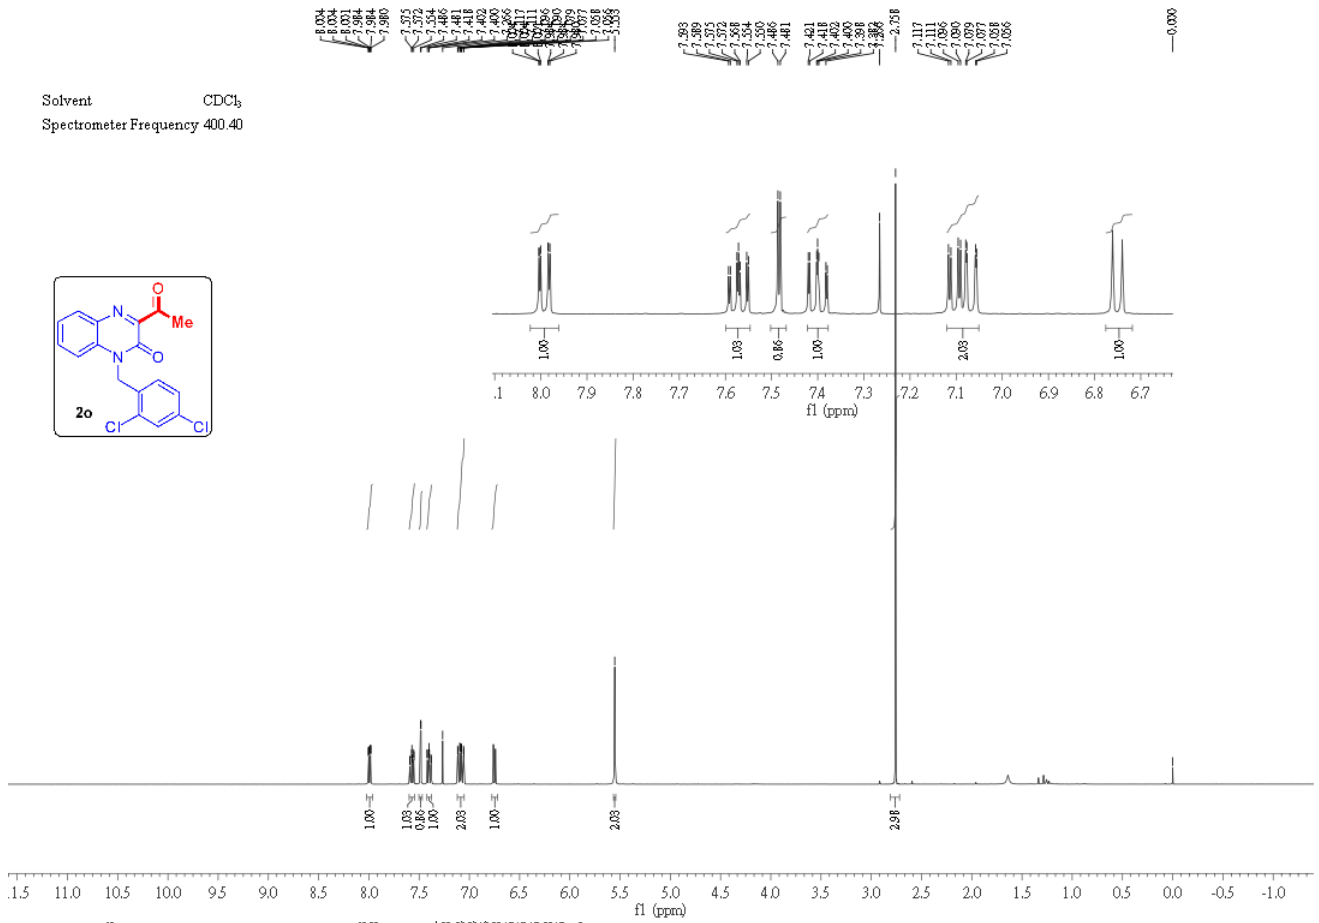

Solvent CDCl<sub>3</sub>  
Spectrometer Frequency 100.69

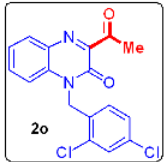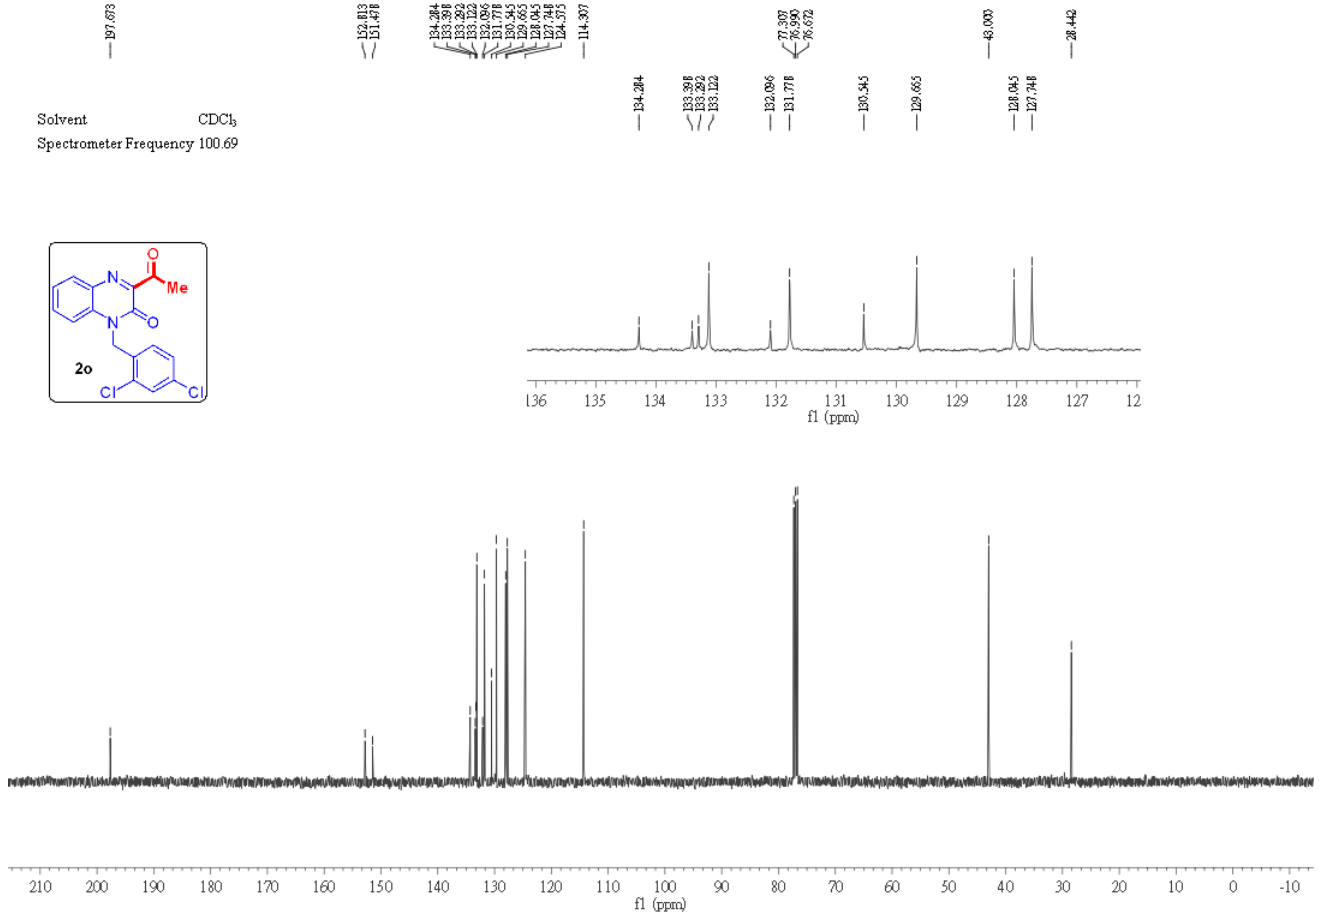

Solvent CDCl<sub>3</sub>  
Spectrometer Frequency 400.40

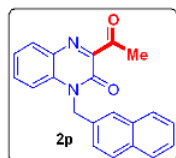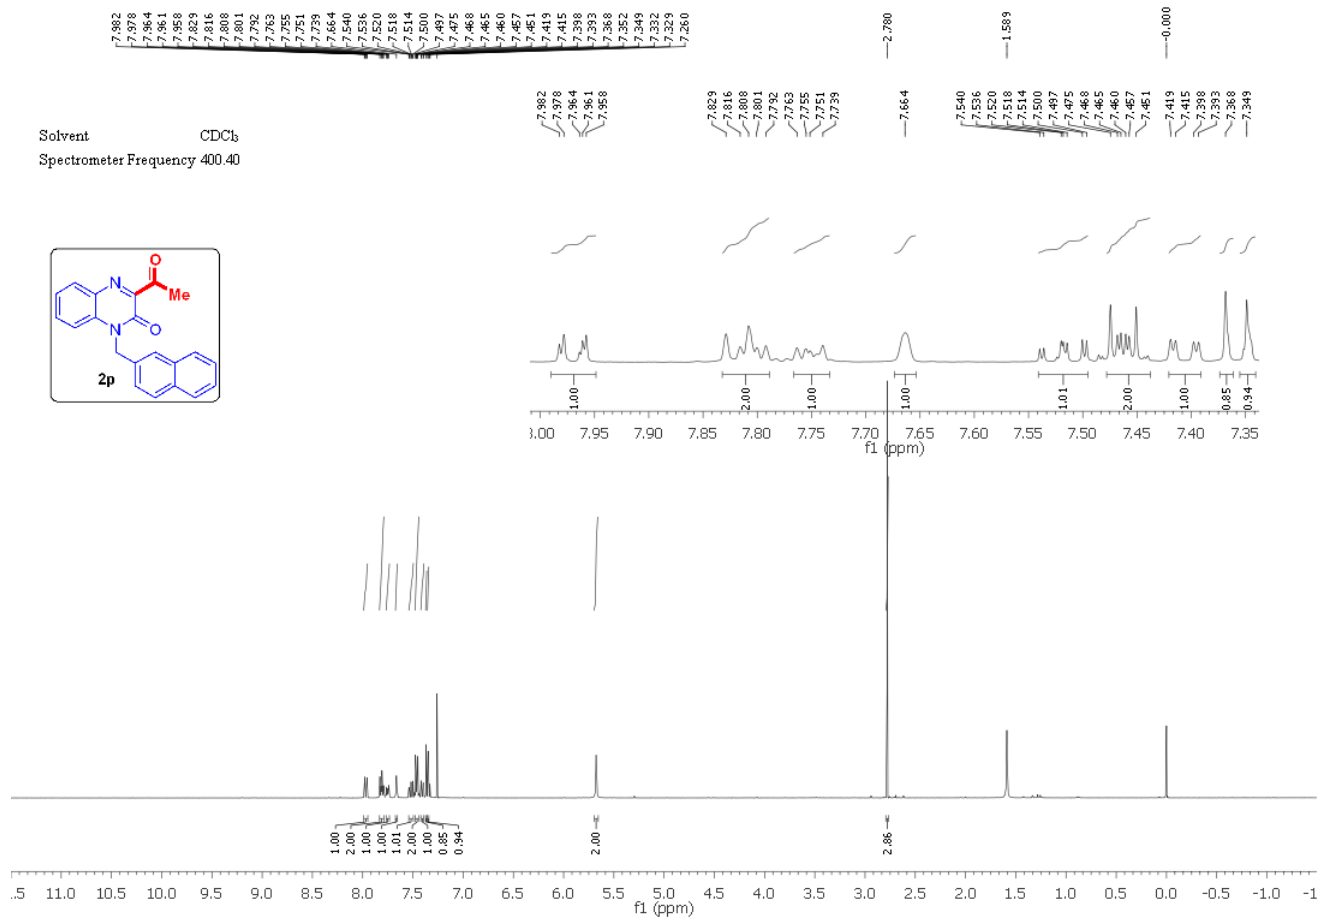

Solvent CDCl<sub>3</sub>  
Spectrometer Frequency 100.69

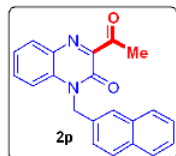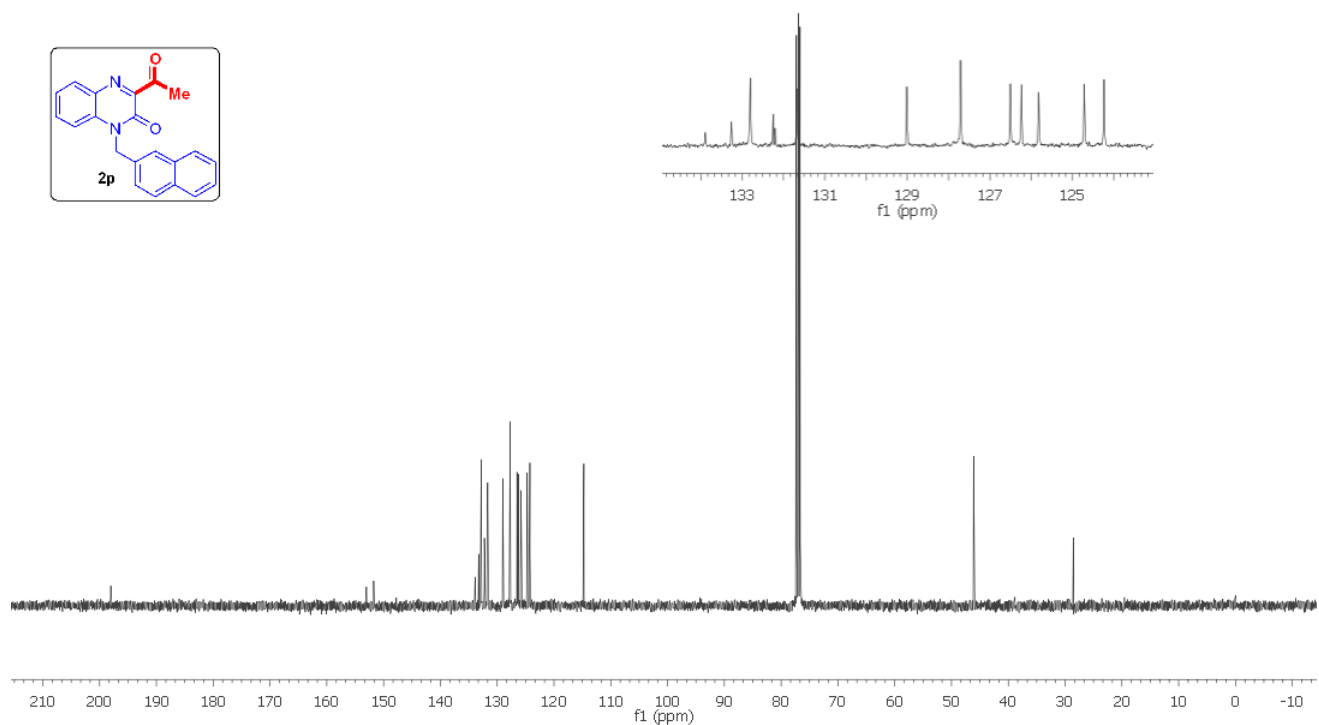

Solvent  $\text{CDCl}_3$   
Spectrometer Frequency 400.40

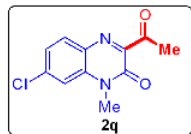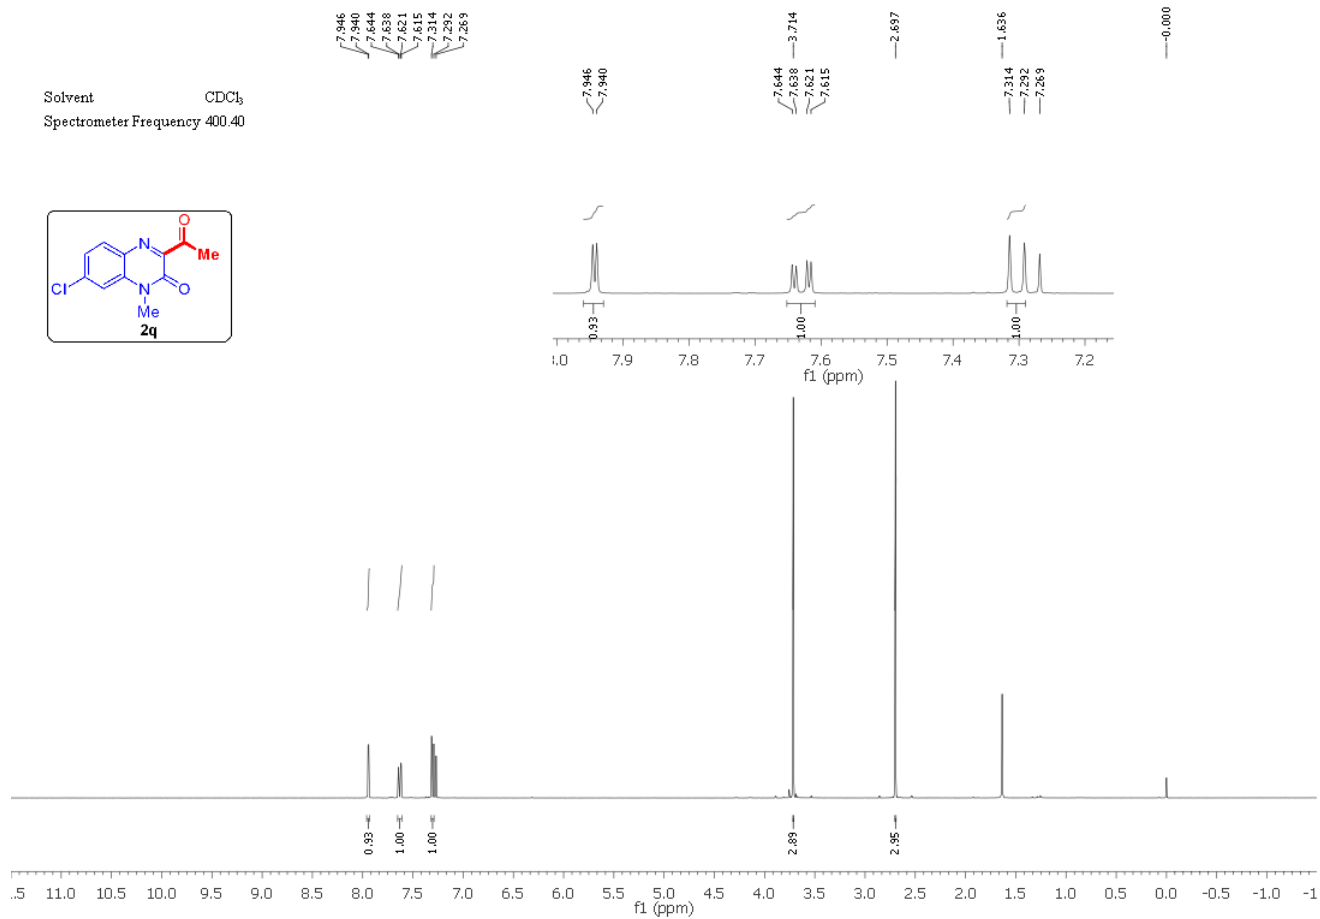

Solvent  $\text{CDCl}_3$   
Spectrometer Frequency 100.69

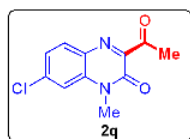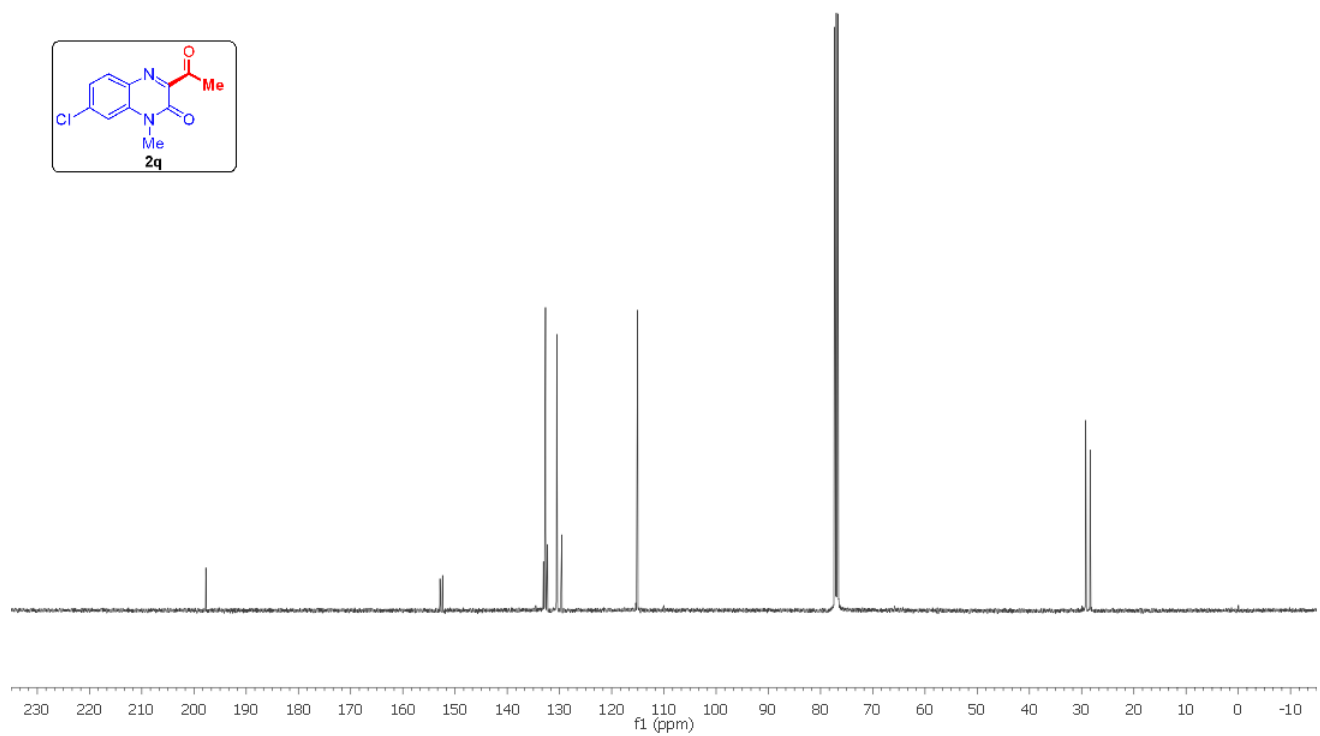



Solvent CDCl<sub>3</sub>  
Spectrometer Frequency 400.40

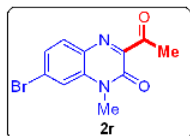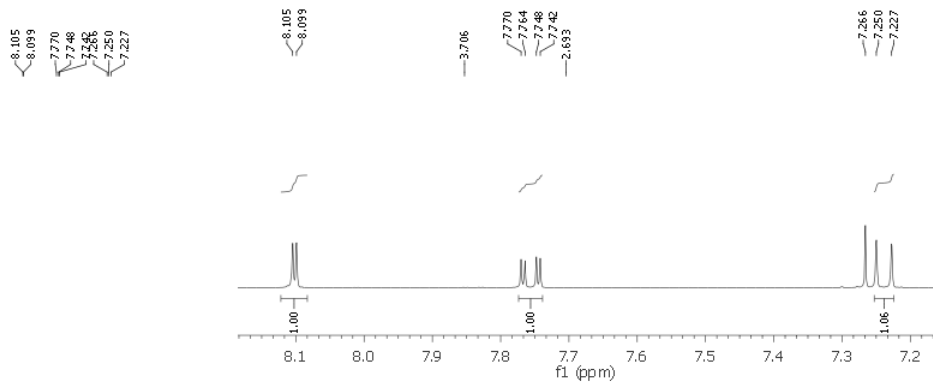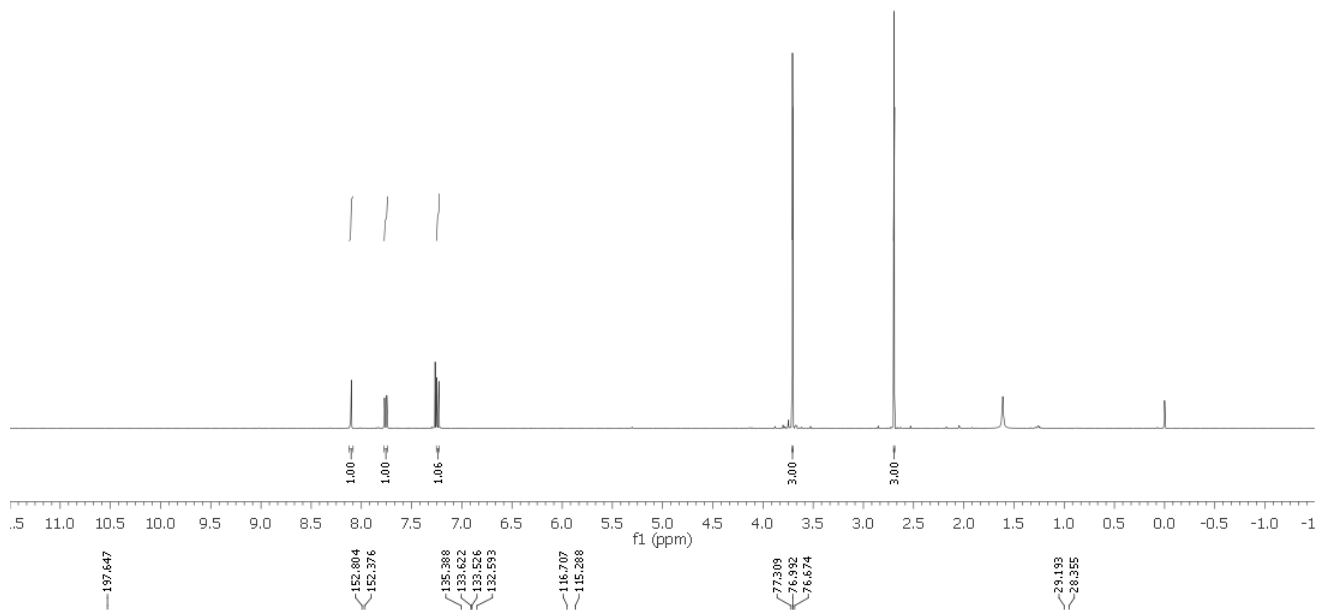

Solvent CDCl<sub>3</sub>  
Spectrometer Frequency 100.69

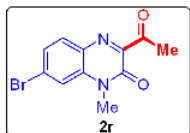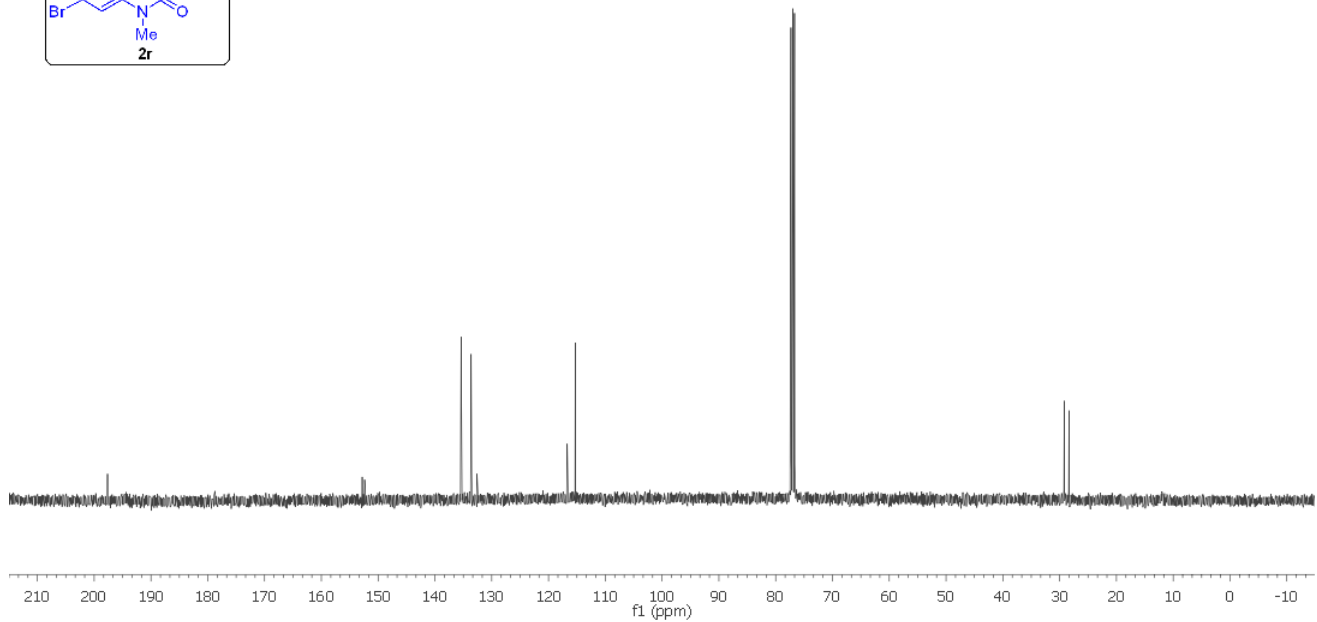

Solvent CDCl<sub>3</sub>  
Spectrometer Frequency 400.40

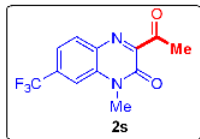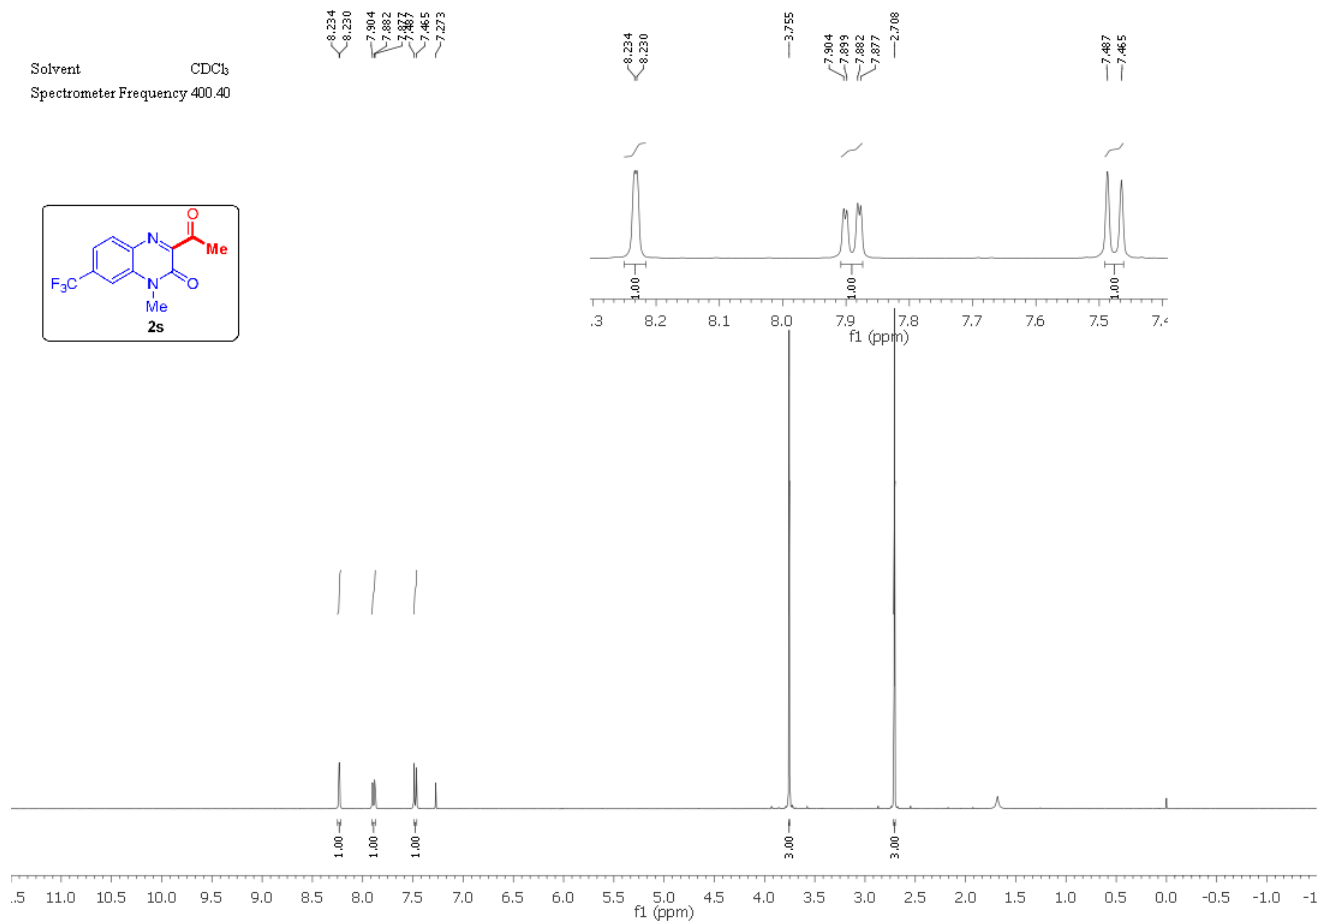

Solvent CDCl<sub>3</sub>  
Spectrometer Frequency 100.69

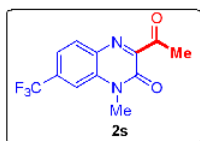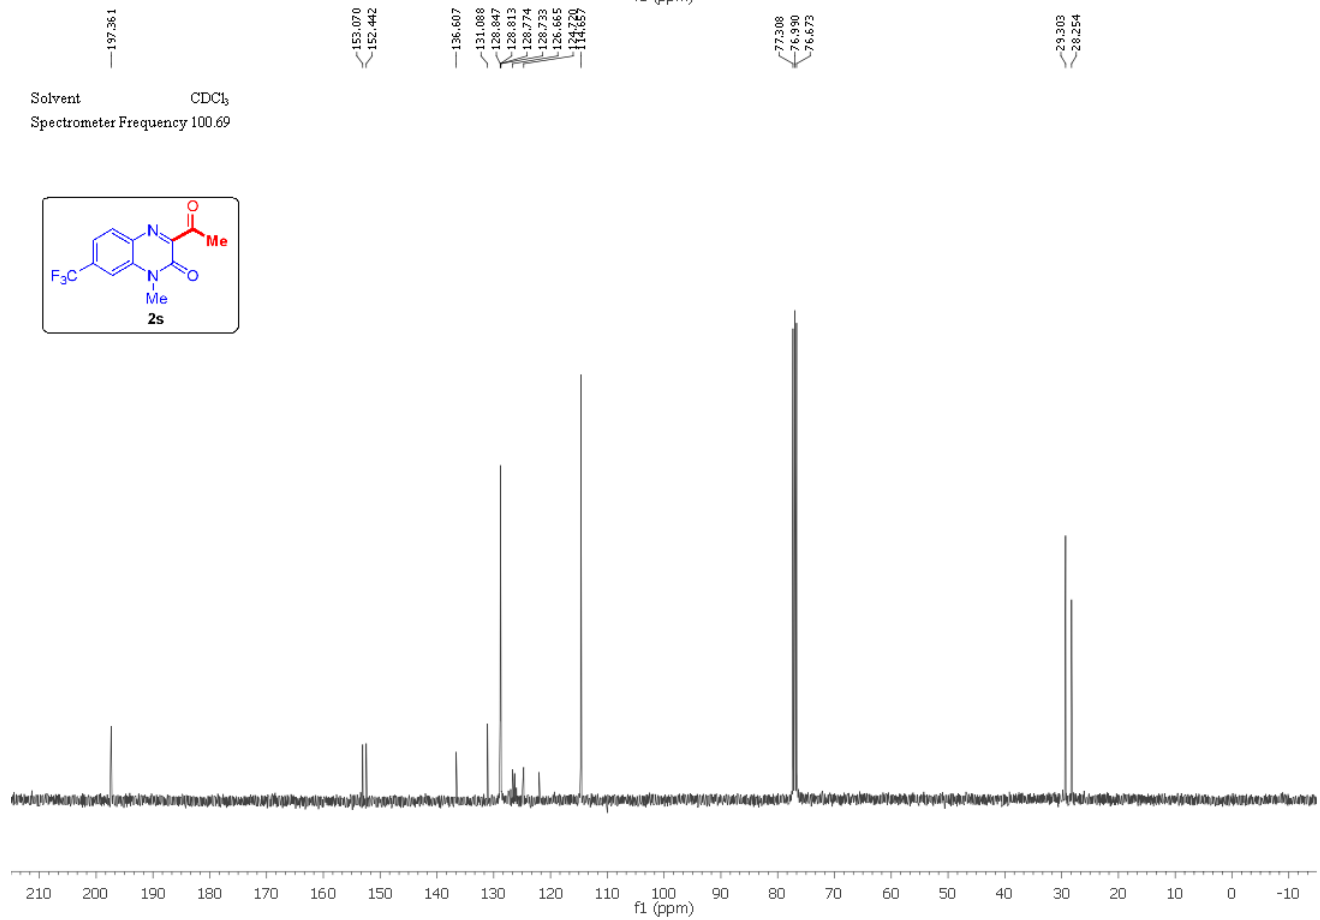

8.195  
8.189  
7.945  
7.940  
7.923  
7.918  
7.874  
7.871  
7.866  
7.853  
7.851  
7.850  
7.850  
7.845  
7.840  
7.835  
7.818  
7.808  
7.803  
7.803  
7.804  
7.804  
7.801  
7.800  
7.788  
7.845  
7.840  
7.835  
7.818  
7.763  
7.674  
7.671  
7.666  
7.656  
7.652  
7.651  
7.650  
7.645  
7.618  
7.616  
7.498  
7.494  
7.492  
7.440  
7.431  
7.428  
7.425  
7.419  
7.419

Solvent CDCl<sub>3</sub>  
Spectrometer Frequency 400.40

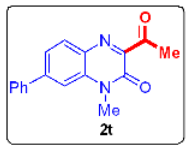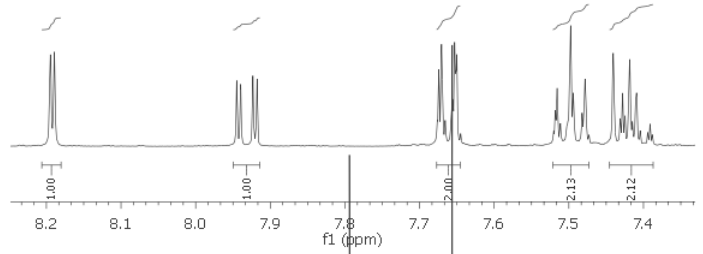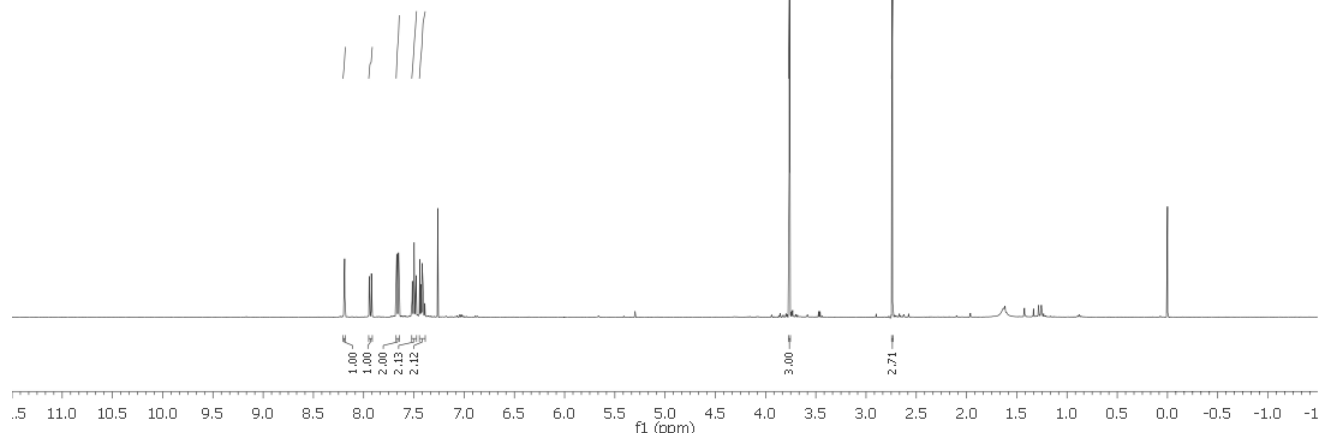

Solvent CDCl<sub>3</sub>  
Spectrometer Frequency 100.69

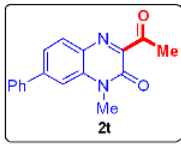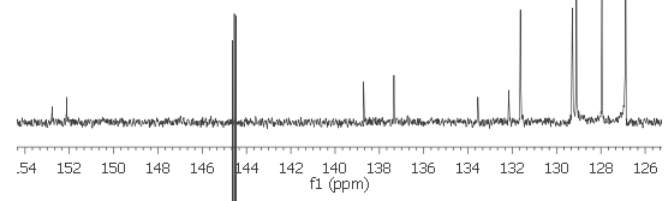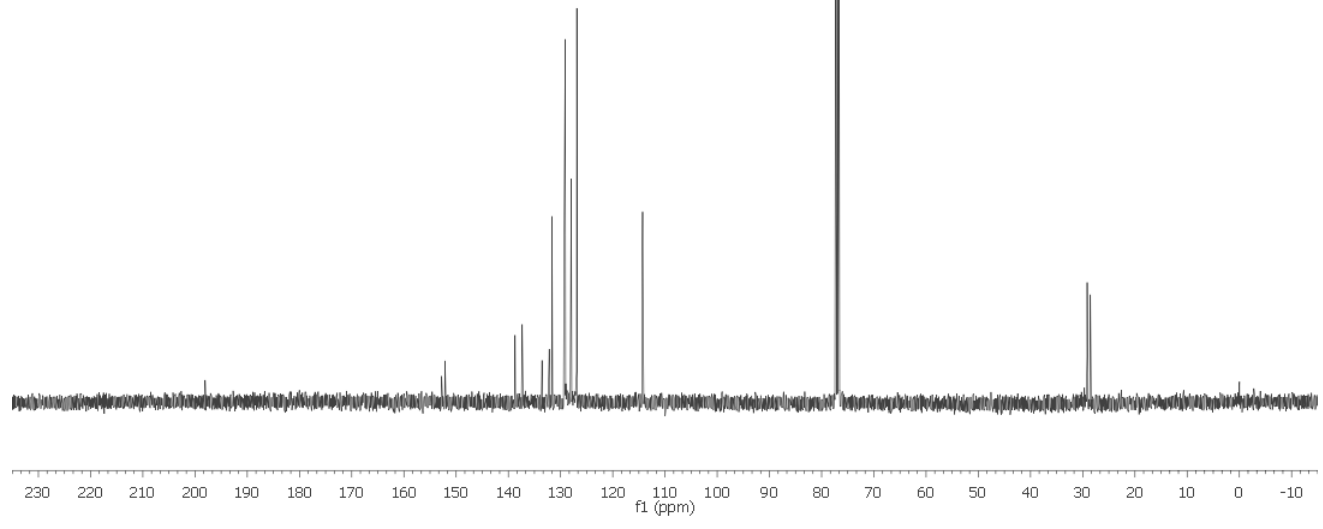

Solvent CDCl<sub>3</sub>  
Spectrometer Frequency 400.40

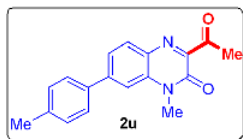

8.166  
8.161  
7.924  
7.918  
7.902  
7.896  
7.885  
7.880  
7.854  
7.844  
7.416  
7.394  
7.310  
7.309  
7.304  
7.294  
7.289  
7.288  
7.263  
8.166  
7.924  
7.918  
7.902  
7.896  
3.752  
2.734  
2.420  
7.555  
7.550  
7.549  
7.544  
7.416  
7.394  
7.310  
7.309  
7.304  
7.294  
7.289  
7.288  
7.263

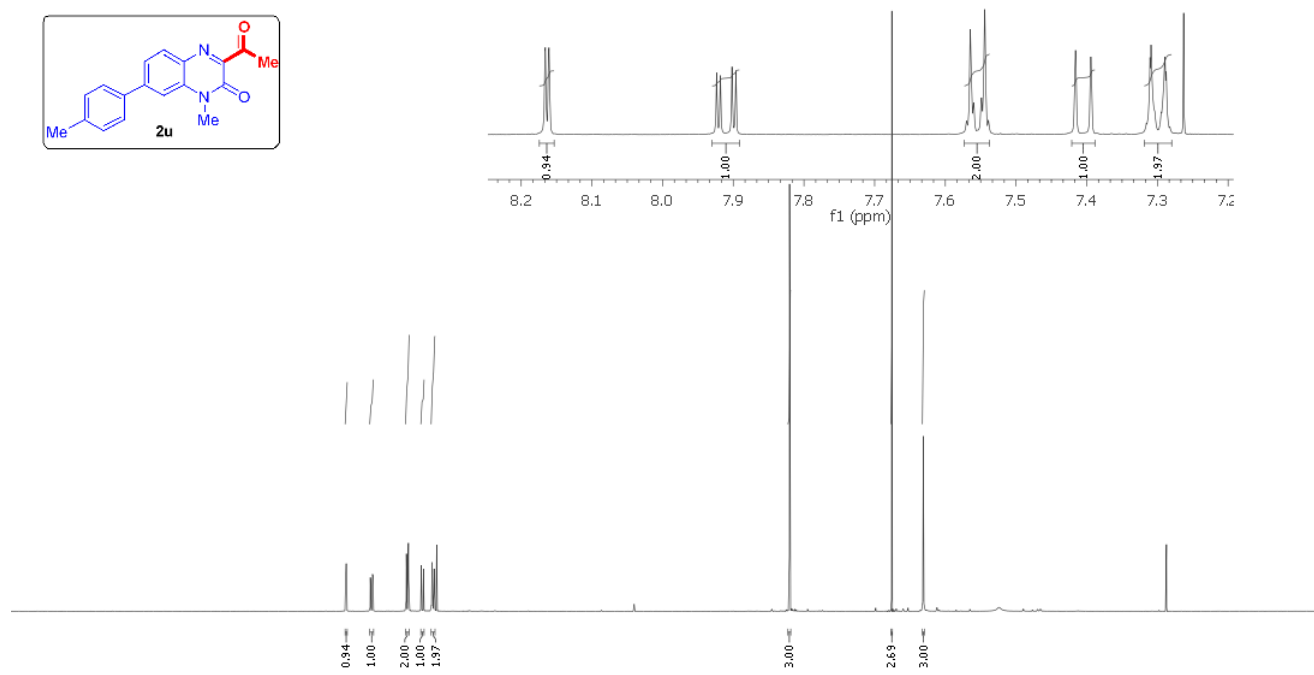

11.0  
10.5  
10.0  
9.5  
9.0  
8.5  
8.0  
7.5  
7.0  
6.5  
6.0  
5.5  
5.0  
4.5  
4.0  
3.5  
3.0  
2.5  
2.0  
1.5  
1.0  
0.5  
0.0  
-0.5  
-1.0  
f1 (ppm)

Solvent CDCl<sub>3</sub>  
Spectrometer Frequency 100.69

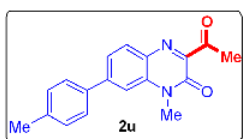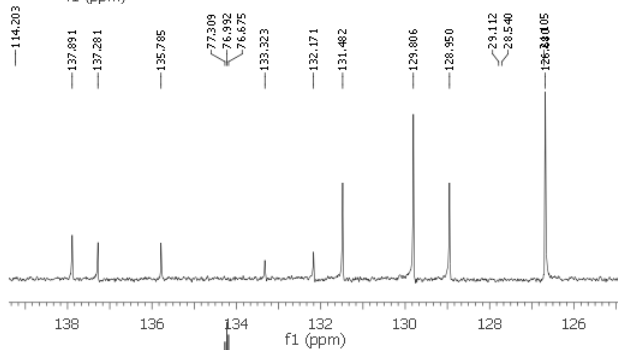

198.087  
152.762  
152.057  
137.891  
137.281  
135.785  
133.323  
132.171  
131.482  
129.806  
128.950  
126.680  
114.203  
137.891  
137.281  
135.785  
77.809  
76.992  
76.675  
133.323  
132.171  
131.482  
129.806  
128.950  
28.112  
28.546  
126.680

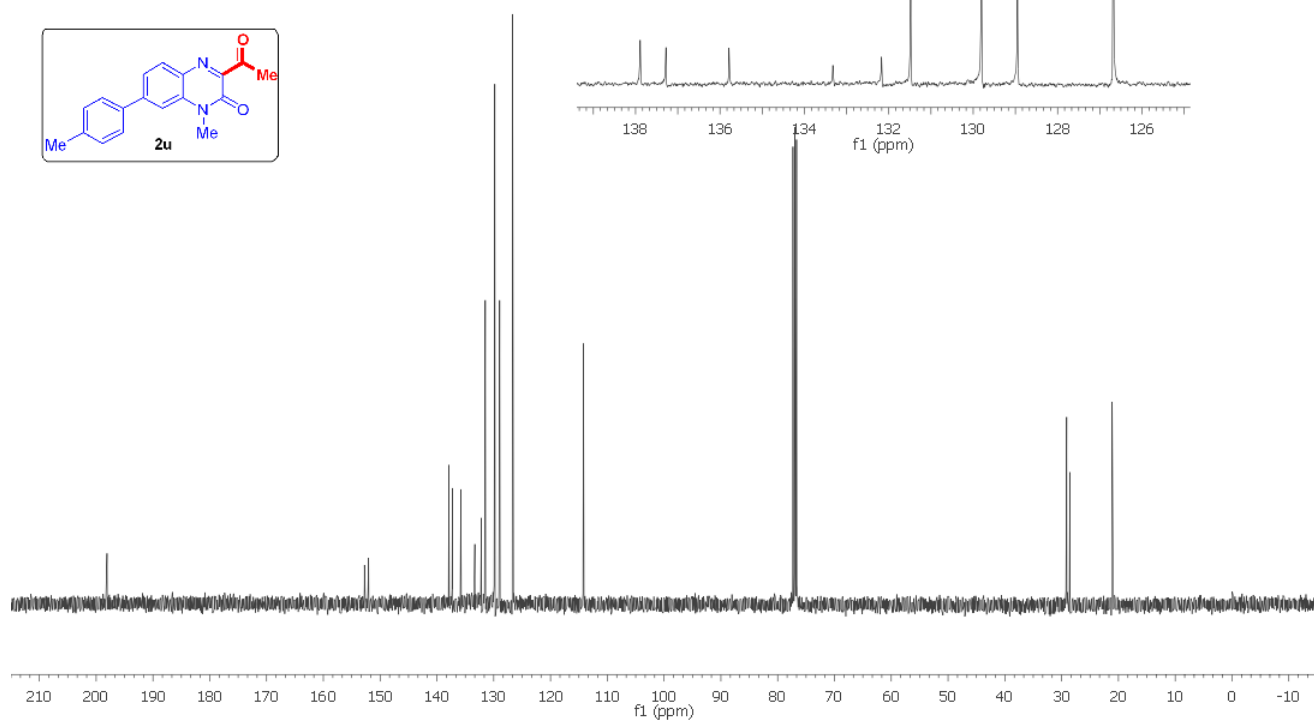

# checkCIF/PLATON report

Structure factors have been supplied for datablock(s) I

THIS REPORT IS FOR GUIDANCE ONLY. IF USED AS PART OF A REVIEW PROCEDURE FOR PUBLICATION, IT SHOULD NOT REPLACE THE EXPERTISE OF AN EXPERIENCED CRYSTALLOGRAPHIC REFEREE.

No syntax errors found.      CIF dictionary      Interpreting this report

## Datablock: I

---

Bond precision:    C-C = 0.0021 A                      Wavelength=0.71073

Cell:                      a=4.6921 (1)              b=21.3139 (7)              c=14.5759 (4)  
                                    alpha=90                      beta=97.032 (3)              gamma=90

Temperature:              113 K

|                        | Calculated    | Reported      |
|------------------------|---------------|---------------|
| Volume                 | 1446.73 (7)   | 1446.73 (7)   |
| Space group            | P 21/c        | P 1 21/c 1    |
| Hall group             | -P 2ybc       | -P 2ybc       |
| Moiety formula         | C18 H16 N2 O2 | C18 H16 N2 O2 |
| Sum formula            | C18 H16 N2 O2 | C18 H16 N2 O2 |
| Mr                     | 292.33        | 292.33        |
| Dx, g cm <sup>-3</sup> | 1.342         | 1.342         |
| Z                      | 4             | 4             |
| Mu (mm <sup>-1</sup> ) | 0.089         | 0.089         |
| F000                   | 616.0         | 616.0         |
| F000'                  | 616.26        |               |
| h, k, lmax             | 5, 25, 17     | 5, 25, 17     |
| Nref                   | 2555          | 2512          |
| Tmin, Tmax             | 0.978, 0.982  | 0.832, 1.000  |
| Tmin'                  | 0.978         |               |

Correction method= # Reported T Limits: Tmin=0.832 Tmax=1.000  
AbsCorr = MULTI-SCAN

Data completeness= 0.983                      Theta(max)= 24.997

R(reflections)= 0.0404 ( 2068)              wR2(reflections)= 0.1052 ( 2512)

S = 1.094                      Npar= 201

---

The following ALERTS were generated. Each ALERT has the format

**test-name\_ALERT\_alert-type\_alert-level.**

Click on the hyperlinks for more details of the test.

---

**Alert level C**

PLAT911\_ALERT\_3\_C Missing FCF Refl Between Thmin & STh/L= 0.595 43 Report  
PLAT918\_ALERT\_3\_C Reflection(s) with I(obs) much Smaller I(calc) . 1 Check

---

**Alert level G**

PLAT909\_ALERT\_3\_G Percentage of I>2sig(I) Data at Theta(Max) Still 65% Note  
PLAT933\_ALERT\_2\_G Number of OMIT Records in Embedded .res File ... 3 Note  
PLAT941\_ALERT\_3\_G Average HKL Measurement Multiplicity ..... 3.8 Low  
PLAT978\_ALERT\_2\_G Number C-C Bonds with Positive Residual Density. 5 Info

---

0 **ALERT level A** = Most likely a serious problem - resolve or explain  
0 **ALERT level B** = A potentially serious problem, consider carefully  
2 **ALERT level C** = Check. Ensure it is not caused by an omission or oversight  
4 **ALERT level G** = General information/check it is not something unexpected

0 ALERT type 1 CIF construction/syntax error, inconsistent or missing data  
2 ALERT type 2 Indicator that the structure model may be wrong or deficient  
4 ALERT type 3 Indicator that the structure quality may be low  
0 ALERT type 4 Improvement, methodology, query or suggestion  
0 ALERT type 5 Informative message, check

---

## checkCIF publication errors

---

**Alert level A**

PUBL004\_ALERT\_1\_A The contact author's name and address are missing,  
\_publ\_contact\_author\_name and \_publ\_contact\_author\_address.  
PUBL005\_ALERT\_1\_A \_publ\_contact\_author\_email, \_publ\_contact\_author\_fax and  
\_publ\_contact\_author\_phone are all missing.  
At least one of these should be present.  
PUBL006\_ALERT\_1\_A \_publ\_requested\_journal is missing  
e.g. 'Acta Crystallographica Section C'  
PUBL008\_ALERT\_1\_A \_publ\_section\_title is missing. Title of paper.  
PUBL009\_ALERT\_1\_A \_publ\_author\_name is missing. List of author(s) name(s).  
PUBL010\_ALERT\_1\_A \_publ\_author\_address is missing. Author(s) address(es).  
PUBL012\_ALERT\_1\_A \_publ\_section\_abstract is missing.  
Abstract of paper in English.

---

7 **ALERT level A** = Data missing that is essential or data in wrong format  
0 **ALERT level G** = General alerts. Data that may be required is missing

---

## Publication of your CIF

You should attempt to resolve as many as possible of the alerts in all categories. Often the minor alerts point to easily fixed oversights, errors and omissions in your CIF or refinement strategy, so attention to these fine details can be worthwhile. In order to resolve some of the more serious problems it may be necessary to carry out additional measurements or structure refinements. However, the nature of your study may justify the reported deviations from journal submission requirements and the more serious of these should be commented upon in the discussion or experimental section of a paper or in the "special\_details" fields of the CIF. *checkCIF* was carefully designed to identify outliers and unusual parameters, but every test has its limitations and alerts that are not important in a particular case may appear. Conversely, the absence of alerts does not guarantee there are no aspects of the results needing attention. It is up to the individual to critically assess their own results and, if necessary, seek expert advice.

If level A alerts remain, which you believe to be justified deviations, and you intend to submit this CIF for publication in a journal, you should additionally insert an explanation in your CIF using the Validation Reply Form (VRF) below. This will allow your explanation to be considered as part of the review process.

## Validation response form

Please find below a validation response form (VRF) that can be filled in and pasted into your CIF.

```
# start Validation Reply Form
_vrf_PUBL004_GLOBAL
;
PROBLEM: The contact author's name and address are missing,
RESPONSE: ...
;
_vrf_PUBL005_GLOBAL
;
PROBLEM: _publ_contact_author_email, _publ_contact_author_fax and
RESPONSE: ...
;
_vrf_PUBL006_GLOBAL
;
PROBLEM: _publ_requested_journal is missing
RESPONSE: ...
;
_vrf_PUBL008_GLOBAL
;
PROBLEM: _publ_section_title is missing. Title of paper.
RESPONSE: ...
;
_vrf_PUBL009_GLOBAL
;
PROBLEM: _publ_author_name is missing. List of author(s) name(s).
RESPONSE: ...
;
_vrf_PUBL010_GLOBAL
;
PROBLEM: _publ_author_address is missing. Author(s) address(es).
RESPONSE: ...
;
_vrf_PUBL012_GLOBAL
;
```

PROBLEM: \_publ\_section\_abstract is missing.  
RESPONSE: ...  
;  
# end Validation Reply Form

If you wish to submit your CIF for publication in Acta Crystallographica Section C or E, you should upload your CIF via the web. If you wish to submit your CIF for publication in IUCrData you should upload your CIF via the web. If your CIF is to form part of a submission to another IUCr journal, you will be asked, either during electronic submission or by the Co-editor handling your paper, to upload your CIF via our web site.

---

**PLATON version of 10/08/2020; check.def file version of 06/08/2020**

Datablock 1 - ellipsoid plot

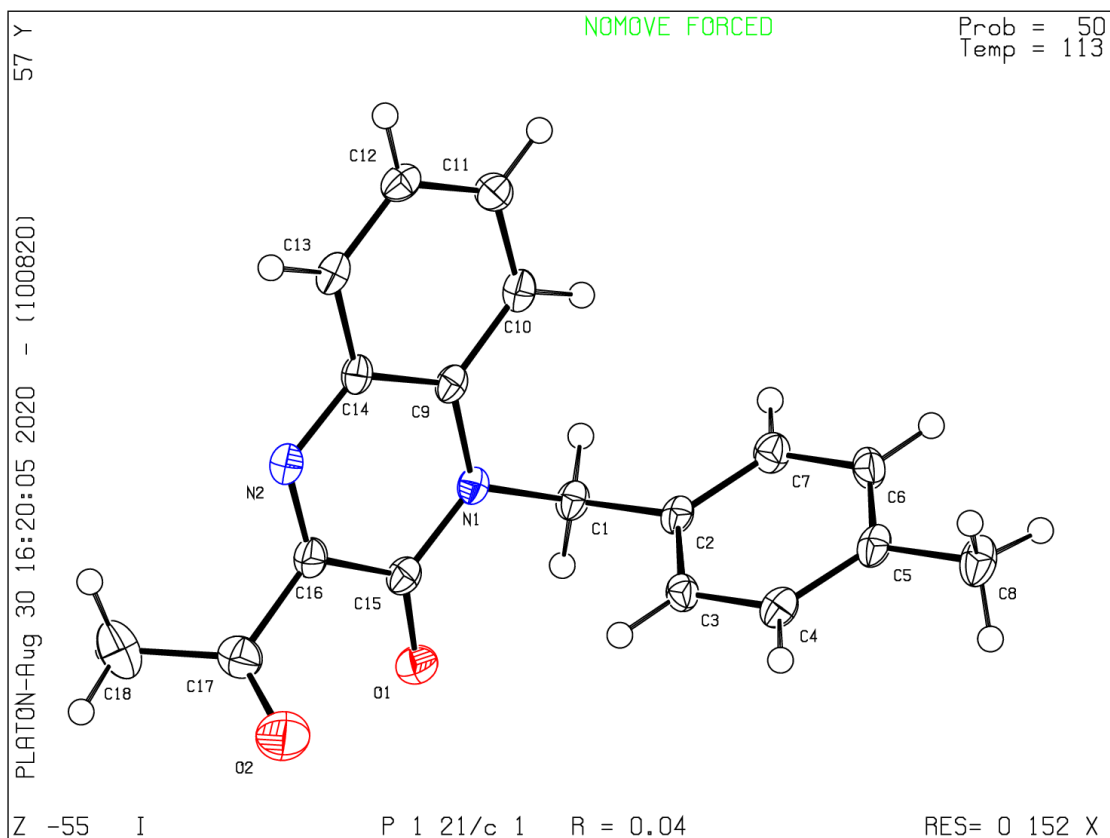



# checkCIF/PLATON report

Structure factors have been supplied for datablock(s) I

THIS REPORT IS FOR GUIDANCE ONLY. IF USED AS PART OF A REVIEW PROCEDURE FOR PUBLICATION, IT SHOULD NOT REPLACE THE EXPERTISE OF AN EXPERIENCED CRYSTALLOGRAPHIC REFEREE.

No syntax errors found.      CIF dictionary      Interpreting this report

## Datablock: I

---

|                        |                   |                       |               |
|------------------------|-------------------|-----------------------|---------------|
| Bond precision:        | C-C = 0.0020 A    | Wavelength=0.71073    |               |
| Cell:                  | a=7.7070 (1)      | b=17.6134 (2)         | c=22.5179 (2) |
|                        | alpha=90          | beta=93.088 (1)       | gamma=90      |
| Temperature:           | 113 K             |                       |               |
|                        | Calculated        | Reported              |               |
| Volume                 | 3052.29 (6)       | 3052.29 (6)           |               |
| Space group            | P 21/c            | P 1 21/c 1            |               |
| Hall group             | -P 2ybc           | -P 2ybc               |               |
| Moiety formula         | C17 H12 Cl2 N2 O2 | 2 (C17 H12 Cl2 N2 O2) |               |
| Sum formula            | C17 H12 Cl2 N2 O2 | C34 H24 Cl4 N4 O4     |               |
| Mr                     | 347.19            | 694.37                |               |
| Dx, g cm <sup>-3</sup> | 1.511             | 1.511                 |               |
| Z                      | 8                 | 4                     |               |
| Mu (mm <sup>-1</sup> ) | 0.436             | 0.436                 |               |
| F000                   | 1424.0            | 1424.0                |               |
| F000'                  | 1426.89           |                       |               |
| h, k, lmax             | 9, 22, 28         | 9, 22, 28             |               |
| Nref                   | 6693              | 6459                  |               |
| Tmin, Tmax             | 0.877, 0.897      | 0.638, 1.000          |               |
| Tmin'                  | 0.877             |                       |               |

Correction method= # Reported T Limits: Tmin=0.638 Tmax=1.000  
AbsCorr = MULTI-SCAN

Data completeness= 0.965      Theta (max)= 27.039

R(reflections)= 0.0305 ( 5716)      wR2(reflections)= 0.0777 ( 6459)

S = 1.059      Npar= 417

---

The following ALERTS were generated. Each ALERT has the format

**test-name\_ALERT\_alert-type\_alert-level.**

Click on the hyperlinks for more details of the test.

---

**Alert level C**

PLAT911\_ALERT\_3\_C Missing FCF Refl Between Thmin & STh/L= 0.600 5 Report

---

**Alert level G**

PLAT042\_ALERT\_1\_G Calc. and Reported MoietyFormula Strings Differ Please Check  
PLAT045\_ALERT\_1\_G Calculated and Reported Z Differ by a Factor ... 2.00 Check  
PLAT143\_ALERT\_4\_G s.u. on c - Axis Small or Missing ..... 0.00020 Ang.  
PLAT380\_ALERT\_4\_G Incorrectly? Oriented X(sp2)-Methyl Moiety ..... C17 Check  
PLAT432\_ALERT\_2\_G Short Inter X...Y Contact O1 ..C32 2.98 Ang.  
x,y,z = 1\_555 Check  
PLAT910\_ALERT\_3\_G Missing # of FCF Reflection(s) Below Theta(Min). 2 Note  
PLAT912\_ALERT\_4\_G Missing # of FCF Reflections Above STh/L= 0.600 227 Note  
PLAT933\_ALERT\_2\_G Number of OMIT Records in Embedded .res File ... 3 Note  
PLAT978\_ALERT\_2\_G Number C-C Bonds with Positive Residual Density. 15 Info

---

- 0 **ALERT level A** = Most likely a serious problem - resolve or explain  
0 **ALERT level B** = A potentially serious problem, consider carefully  
1 **ALERT level C** = Check. Ensure it is not caused by an omission or oversight  
9 **ALERT level G** = General information/check it is not something unexpected
- 2 ALERT type 1 CIF construction/syntax error, inconsistent or missing data  
3 ALERT type 2 Indicator that the structure model may be wrong or deficient  
2 ALERT type 3 Indicator that the structure quality may be low  
3 ALERT type 4 Improvement, methodology, query or suggestion  
0 ALERT type 5 Informative message, check
- 

## checkCIF publication errors

---

**Alert level A**

PUBL004\_ALERT\_1\_A The contact author's name and address are missing,  
\_publ\_contact\_author\_name and \_publ\_contact\_author\_address.  
PUBL005\_ALERT\_1\_A \_publ\_contact\_author\_email, \_publ\_contact\_author\_fax and  
\_publ\_contact\_author\_phone are all missing.  
At least one of these should be present.  
PUBL006\_ALERT\_1\_A \_publ\_requested\_journal is missing  
e.g. 'Acta Crystallographica Section C'  
PUBL008\_ALERT\_1\_A \_publ\_section\_title is missing. Title of paper.  
PUBL009\_ALERT\_1\_A \_publ\_author\_name is missing. List of author(s) name(s).  
PUBL010\_ALERT\_1\_A \_publ\_author\_address is missing. Author(s) address(es).  
PUBL012\_ALERT\_1\_A \_publ\_section\_abstract is missing.  
Abstract of paper in English.

---

- 7 **ALERT level A** = Data missing that is essential or data in wrong format  
0 **ALERT level G** = General alerts. Data that may be required is missing
-

## Publication of your CIF

You should attempt to resolve as many as possible of the alerts in all categories. Often the minor alerts point to easily fixed oversights, errors and omissions in your CIF or refinement strategy, so attention to these fine details can be worthwhile. In order to resolve some of the more serious problems it may be necessary to carry out additional measurements or structure refinements. However, the nature of your study may justify the reported deviations from journal submission requirements and the more serious of these should be commented upon in the discussion or experimental section of a paper or in the "special\_details" fields of the CIF. *checkCIF* was carefully designed to identify outliers and unusual parameters, but every test has its limitations and alerts that are not important in a particular case may appear. Conversely, the absence of alerts does not guarantee there are no aspects of the results needing attention. It is up to the individual to critically assess their own results and, if necessary, seek expert advice.

If level A alerts remain, which you believe to be justified deviations, and you intend to submit this CIF for publication in a journal, you should additionally insert an explanation in your CIF using the Validation Reply Form (VRF) below. This will allow your explanation to be considered as part of the review process.

## Validation response form

Please find below a validation response form (VRF) that can be filled in and pasted into your CIF.

```
# start Validation Reply Form
_vrf_PUBL004_GLOBAL
;
PROBLEM: The contact author's name and address are missing,
RESPONSE: ...
;
_vrf_PUBL005_GLOBAL
;
PROBLEM: _publ_contact_author_email, _publ_contact_author_fax and
RESPONSE: ...
;
_vrf_PUBL006_GLOBAL
;
PROBLEM: _publ_requested_journal is missing
RESPONSE: ...
;
_vrf_PUBL008_GLOBAL
;
PROBLEM: _publ_section_title is missing. Title of paper.
RESPONSE: ...
;
_vrf_PUBL009_GLOBAL
;
PROBLEM: _publ_author_name is missing. List of author(s) name(s).
RESPONSE: ...
;
_vrf_PUBL010_GLOBAL
;
PROBLEM: _publ_author_address is missing. Author(s) address(es).
RESPONSE: ...
;
_vrf_PUBL012_GLOBAL
;
```

PROBLEM: \_publ\_section\_abstract is missing.  
RESPONSE: ...  
;  
# end Validation Reply Form

If you wish to submit your CIF for publication in Acta Crystallographica Section C or E, you should upload your CIF via the web. If you wish to submit your CIF for publication in IUCrData you should upload your CIF via the web. If your CIF is to form part of a submission to another IUCr journal, you will be asked, either during electronic submission or by the Co-editor handling your paper, to upload your CIF via our web site.

**PLATON version of 22/04/2020; check.def file version of 09/03/2020**

Datablock 1 - ellipsoid plot

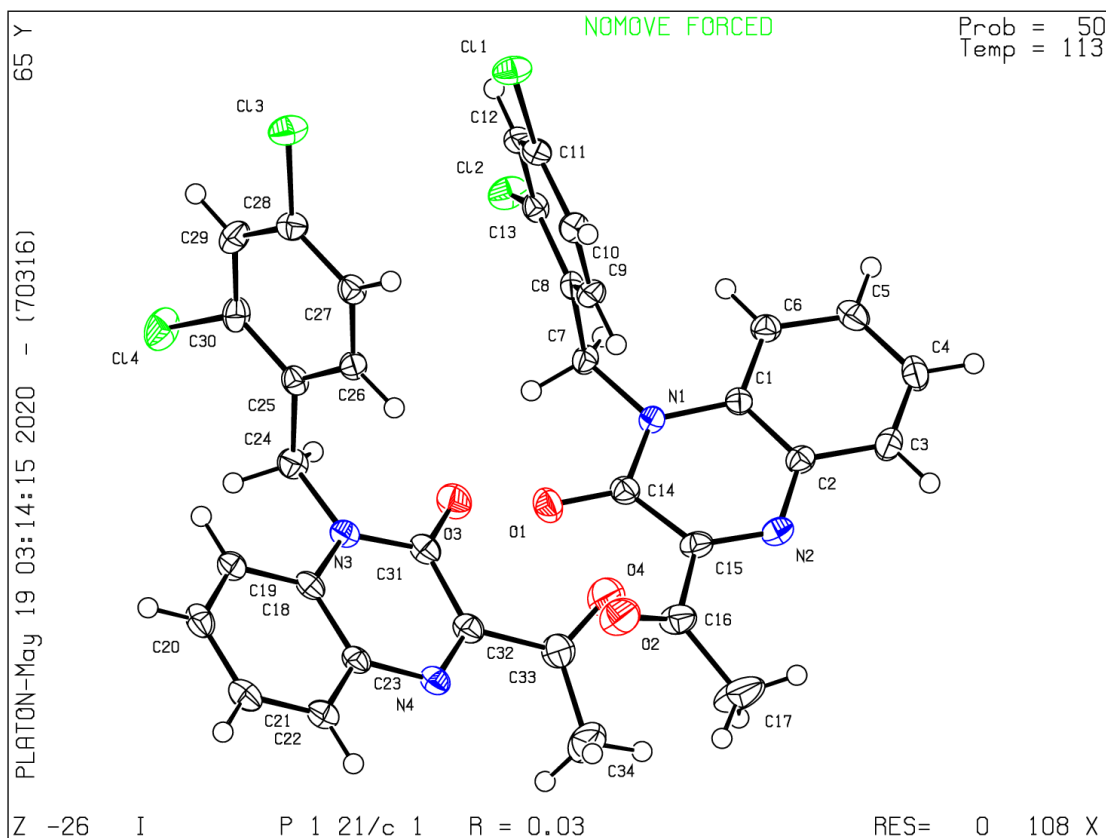

Supplement: d1ob00769f1.pdf [file d1ob00769f1.pdf]
